# Supplementary material for: Diels–Alder cycloadditions of N-arylpyrroles via aryne intermediates using diaryliodonium salts
Source: publisher site journal article supplement (doi:10.3762/bjoc.14.23), 2018-02-06
Supplement: Additional file 1 [file 1860-5397-14-23-S1.pdf]

## **Supporting Information**

**for**

# **Diels–Alder cycloadditions of *N*-arylpyrroles via ar-yne intermediates using diaryliodonium salts**

Huangguan Chen<sup>1</sup>, Jianwei Han<sup>\*1,2</sup> and Limin Wang<sup>\*1</sup>

Address: <sup>1</sup>Key Laboratory for Advanced Materials, Institute of Fine Chemicals, School of Chemistry & Molecular Engineering, East China University of Science and Technology, 130 Meilong Road, Shanghai 200237, P. R. China and <sup>2</sup>Shanghai–Hong Kong Joint Laboratory in Chemical Synthesis, Shanghai Institute of Organic Chemistry, The Chinese Academy of Sciences, 345 Lingling Road, Shanghai 200032, China

Email: Jianwei Han\* - jianweihan@ecust.edu.cn; Limin Wang\* - wanglimin@ecust.edu.cn.

\*Corresponding author

**Experimental procedures and characterization data of all products,  
copies of <sup>1</sup>H, <sup>13</sup>C, <sup>19</sup>F NMR and HRMS spectra of all compounds**

## Table of contents

|                                                                                                                                          |                |
|------------------------------------------------------------------------------------------------------------------------------------------|----------------|
| <b>Part 1. General information.....</b>                                                                                                  | <b>S3</b>      |
| a. Methods                                                                                                                               |                |
| b. Materials                                                                                                                             |                |
| <b>Part 2. Synthesis and characterization of <i>N</i>-substituted pyrroles.....</b>                                                      | <b>S4</b>      |
| <b>Part 3. Synthesis and characterization of products from cycloaddition reactions.....</b>                                              | <b>S8–S18</b>  |
| <b>Part 4. Synthesis and characterization of products from isomerization reactions.....</b>                                              | <b>S19</b>     |
| <b>Part 5. Synthesis and characterization of products from hydrogenation reactions.....</b>                                              | <b>S20</b>     |
| <b>Part 6. References.....</b>                                                                                                           | <b>S21</b>     |
| <b>Part 7. Copies of <math>^1\text{H}</math>, <math>^{13}\text{C}</math>, <math>^{19}\text{F}</math> NMR and HRMS (ESI) spectra.....</b> | <b>S22–S85</b> |

## Part 1. General nformation

### a. Methods:

$^1\text{H}$ ,  $^{13}\text{C}$ , and  $^{19}\text{F}$  NMR spectra were recorded in  $\text{CDCl}_3$  or  $\text{DMSO}-d_6$  (with tetramethylsilane as an internal standard) on a Bruker AVANCE 400 spectrometer, operating at 400 MHz, 100 MHz, and 376 MHz respectively. Chemical shifts ( $\delta$ ) are reported in ppm, and coupling constants ( $J$ ) are in Hertz (Hz). The following abbreviations were used to explain the multiplicities: s = singlet, d = doublet, t = triplet, q = quartet, m = multiplet, br = broad; High resolution mass spectrometry (HRMS) was performed on an ESI-TOF spectrometer; reactions were monitored by TLC (detection with UV light); Column chromatography was performed with silica gel (200–300 mesh ASTM).

### b. Materials:

All solvents were dried and/or distilled by standard methods. All reagents were purchased from commercial sources and used without further purification. The diaryliodonium salts were synthesized according to the literature procedures<sup>[1-3]</sup>. 1-Phenyl-1*H*-pyrrole, *tert*-butyl 1*H*-pyrrole-1-carboxylate, 1-tosyl-1*H*-pyrrole, and 1-methyl-1*H*-pyrrole were commercially available and were used as received. The preparation of all other materials is described in detail below.

## Part 2. Synthesis and characterization of *N*-substituted pyrroles.

### General procedure 1: Synthesis of *N*-aryl pyrroles.<sup>[4]</sup>

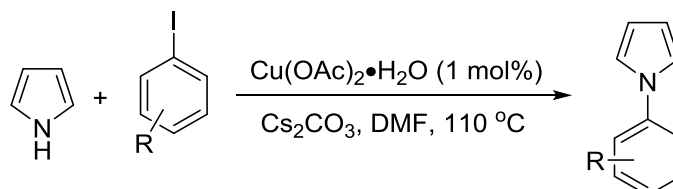

An oven-dried Schlenk tube was charged with  $\text{Cu}(\text{OAc})_2 \cdot \text{H}_2\text{O}$  (0.1 mmol, 0.01 equiv),  $\text{Cs}_2\text{CO}_3$  (20 mmol, 2 equiv), and aryl iodide (if solid, 12 mmol, 1.2 equiv). The tube was degassed with argon for three times. Then DMF (20 mL), pyrrole (10 mmol, 1 equiv), and aryl iodide (if liquid, 12 mmol, 1.2 equiv) were added via syringe under room temperature. The mixture was stirred at  $110^\circ\text{C}$  for 24 h, and then cooled down to room temperature. The reaction mixture was quenched with water (40 mL) and extracted with ethyl ether (20 mL) for three times. The combined organic layers were dried with  $\text{Na}_2\text{SO}_4$ , filtered and concentrated. The crude products were purified using flash column chromatography on silica gel to afford the desired product.

### 1-(*p*-Tolyl)-1*H*-pyrrole (**1b**)

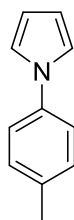

Prepared according to the **general procedure 1** on 10.0 mmol scale and obtained an isolated yield of 75% (1.18 g) as a white solid. Spectral data is consistent with that of previous reported.<sup>[5]</sup>

$^1\text{H}$  NMR (400 MHz,  $\text{CDCl}_3$ )  $\delta$  7.34 – 7.29 (m, 2H), 7.26 (t,  $J = 9.1$  Hz, 2H), 7.09 (t,  $J = 2.2$  Hz, 2H), 6.37 (t,  $J = 2.2$  Hz, 2H), 2.41 (s, 3H).

$^{13}\text{C}$  NMR (100 MHz,  $\text{CDCl}_3$ )  $\delta$  138.5, 135.4, 130.1, 120.6, 119.4, 110.1, 20.9.

### 1-(4-(*tert*-Butyl)phenyl)-1*H*-pyrrole (**1c**)

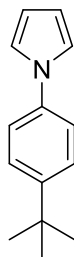

Prepared according to the **general procedure 1** on 10.0 mmol scale and obtained an isolated yield of 79% (1.58 g) as a white solid. Spectral data is consistent with that of previous reported.<sup>[6]</sup>

$^1\text{H}$  NMR (400 MHz,  $\text{CDCl}_3$ )  $\delta$  7.48 (d,  $J = 8.6$  Hz, 2H), 7.37 (d,  $J = 8.6$  Hz, 2H), 7.12 (t,  $J = 2.0$

Hz, 2H), 6.38 (t,  $J = 2.0$  Hz, 2H), 1.40 (s, 9H).

$^{13}\text{C}$  NMR (100 MHz,  $\text{CDCl}_3$ )  $\delta$  148.7, 138.4, 126.4, 120.3, 119.4, 110.1, 34.5, 31.4.

#### 1-(4-Methoxyphenyl)-1H-pyrrole (1d)

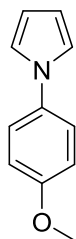

Prepared according to the **general procedure 1** on 10.0 mmol scale and obtained an isolated yield of 63% (1.09 g) as a white solid. Spectral data is consistent with that of previous reported.<sup>[5]</sup>

$^1\text{H}$  NMR (400 MHz,  $\text{CDCl}_3$ )  $\delta$  7.27 – 7.20 (m, 2H), 6.92 (t,  $J = 2.2$  Hz, 2H), 6.90 – 6.83 (m, 2H), 6.25 (t,  $J = 2.2$  Hz, 2H), 3.76 (s, 3H).

$^{13}\text{C}$  NMR (100 MHz,  $\text{CDCl}_3$ )  $\delta$  157.7, 134.5, 122.2, 119.7, 114.6, 109.9, 55.6.

#### 1-(4-Fluorophenyl)-1H-pyrrole (1e)

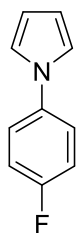

Prepared according to the **general procedure 1** on 10.0 mmol scale and obtained an isolated yield of 83% (1.33 g) as a white solid. Spectral data is consistent with that of previous reported.<sup>[7]</sup>

$^1\text{H}$  NMR (400 MHz,  $\text{CDCl}_3$ )  $\delta$  7.46 – 7.30 (m, 2H), 7.23 – 7.09 (m, 2H), 7.05 (t,  $J = 2.2$  Hz, 2H), 6.38 (t,  $J = 2.2$  Hz, 2H).

$^{13}\text{C}$  NMR (100 MHz,  $\text{CDCl}_3$ )  $\delta$  160.6 (d,  $J_{\text{C-F}} = 243.4$  Hz), 137.16, 122.3 (d,  $J_{\text{C-F}} = 8.1$  Hz), 119.64, 116.3 (d,  $J_{\text{C-F}} = 22.7$  Hz), 110.47.

$^{19}\text{F}$  NMR (376 MHz,  $\text{CDCl}_3$ )  $\delta$  -117.10 (s, 1F).

#### 1-(4-Chlorophenyl)-1H-pyrrole (1f)

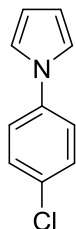

Prepared according to the **general procedure 1** on 10.0 mmol scale and obtained an isolated yield of 87% (1.54 g) as a colorless solid. Spectral data is consistent with that of previous reported.<sup>[5]</sup>

$^1\text{H}$  NMR (400 MHz,  $\text{CDCl}_3$ )  $\delta$  7.42 – 7.34 (m, 2H), 7.34 – 7.28 (m, 2H), 7.04 (t,  $J = 2.2$  Hz, 2H), 6.35 (t,  $J = 2.2$  Hz, 2H).

$^{13}\text{C}$  NMR (100 MHz,  $\text{CDCl}_3$ )  $\delta$  139.3, 131.0, 129.6, 121.6, 119.3, 110.8.

### 1-(4-Bromophenyl)-1*H*-pyrrole (1g)

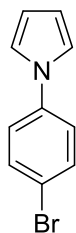

Prepared according to the **general procedure 1** on 10.0 mmol scale and obtained an isolated yield of 83% (1.85 g) as a white solid. Spectral data is consistent with that of previous reported.<sup>[8]</sup>

<sup>1</sup>H NMR (400 MHz, CDCl<sub>3</sub>) δ 7.58 – 7.48 (m, 2H), 7.32 – 7.20 (m, 2H), 7.04 (t, *J* = 2.2 Hz, 2H), 6.35 (t, *J* = 2.2 Hz, 2H).

<sup>13</sup>C NMR (100 MHz, CDCl<sub>3</sub>) δ 139.8, 132.6, 122.0, 119.2, 118.7, 110.9.

### 1-(4-(Trifluoromethyl)phenyl)-1*H*-pyrrole (1h)

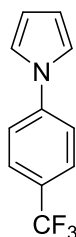

Prepared according to the **general procedure 1** on 10.0 mmol scale and obtained an isolated yield of 95% (2.00 g) as a white solid. Spectral data is consistent with that of previous reported.<sup>[9]</sup>

<sup>1</sup>H NMR (400 MHz, CDCl<sub>3</sub>) δ 7.72 (d, *J* = 8.4 Hz, 2H), 7.52 (d, *J* = 8.4 Hz, 2H), 7.17 (t, *J* = 2.2 Hz, 2H), 6.43 (t, *J* = 2.2 Hz, 2H).

<sup>13</sup>C NMR (100 MHz, CDCl<sub>3</sub>) δ 143.2, 127.4 (q, *J*<sub>C-F</sub> = 32.7 Hz), 126.9 (q, *J*<sub>C-F</sub> = 3.7 Hz), 124.0 (q, *J*<sub>C-F</sub> = 270.1 Hz), 120.0, 119.1, 111.5.

<sup>19</sup>F NMR (376 MHz, CDCl<sub>3</sub>) δ -62.20 (s, 3F).

### 1-(4-(Trifluoromethoxy)phenyl)-1*H*-pyrrole (1i)

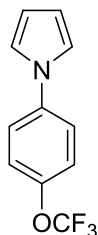

Prepared according to the **general procedure 1** on 10.0 mmol scale and obtained an isolated yield of 95% (2.15 g) as a white solid.

<sup>1</sup>H NMR (400 MHz, CDCl<sub>3</sub>) δ 7.46 – 7.32 (m, 2H), 7.27 (d, *J* = 8.6 Hz, 2H), 7.05 (t, *J* = 2.1 Hz, 2H), 6.36 (t, *J* = 2.1 Hz, 2H).

<sup>13</sup>C NMR (100 MHz, CDCl<sub>3</sub>) δ 146.7, 139.4, 122.3, 121.6, 120.5 (q, *J*<sub>C-F</sub> = 255.7 Hz), 119.2, 110.9.

<sup>19</sup>F NMR (376 MHz, CDCl<sub>3</sub>) δ -58.10 (s, 3F).

**4-(1*H*-Pyrrol-1-yl)benzonitrile (1j)**

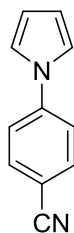

Prepared according to the **general procedure 1** on 10.0 mmol scale and obtained an isolated yield of 89% (1.50 g) as a white solid. Spectral data is consistent with that of previous reported.<sup>[7]</sup>

<sup>1</sup>H NMR (400 MHz, CDCl<sub>3</sub>) δ 7.79 – 7.61 (m, 2H), 7.57 – 7.37 (m, 2H), 7.13 (t, *J* = 2.2 Hz, 2H), 6.40 (t, *J* = 2.2 Hz, 2H).

<sup>13</sup>C NMR (100 MHz, CDCl<sub>3</sub>) δ 143.7, 133.8, 120.0, 118.9, 118.5, 112.2, 108.6.

**1-([1,1'-Biphenyl]-4-yl)-1*H*-pyrrole (1k)**

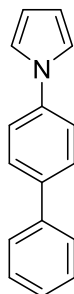

Prepared according to the **general procedure 1** on 10.0 mmol scale and obtained an isolated yield of 82% (1.79 g) as a white solid. Spectral data is consistent with that of previous reported.<sup>[5]</sup>

<sup>1</sup>H NMR (400 MHz, CDCl<sub>3</sub>) δ 7.73 – 7.59 (m, 4H), 7.51 (m, 4H), 7.46 – 7.36 (m, 1H), 7.19 (t, *J* = 2.2 Hz, 2H), 6.44 (t, *J* = 2.2 Hz, 2H).

<sup>13</sup>C NMR (100 MHz, CDCl<sub>3</sub>) δ 140.2, 140.0, 138.6, 128.9, 128.2, 127.4, 127.0, 120.7, 119.3, 110.6.

### Part 3. Synthesis and characterization of products from cycloaddition reactions.

#### General procedure 2: Synthesis of Diels–Alder reaction products.

To an oven-dried Schlenk tube was added iodonium salts (0.5 mmol, 1 equiv) and substituted pyrrole (if solid, 2.5 mmol, 5 equiv). The tube was degassed with argon for three times. Then the tube was placed in an ice bath. Toluene (4.25 mL) and substituted pyrrole (if liquid, 2.5 mmol, 5 equiv) were added sequentially via syringe. After being stirred for approximately 10 minutes, LiHMDS (0.75 mL (1 M in toluene), 0.75 mmol, 1.5 equiv) was added via syringe and the mixture was allowed to warm up to room temperature gradually. After TLC indicated that the iodonium salts were completely consumed, the reaction mixture was quenched by addition of an aqueous solution of ammonium chloride (5 mL) and extracted with DCM (10 mL) for three times. The combined organic layers were dried with Na<sub>2</sub>SO<sub>4</sub>, filtered and concentrated. The crude products were purified using flash column chromatography on silica gel to afford the desired product.

#### 9-Phenyl-1,4-dihydro-1,4-epiminonaphthalene (3aa)

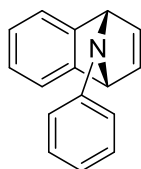

Prepared according to the **general procedure 2** on 0.5 mmol scale and obtained an isolated yield of 85% (93 mg) as a pale brown solid. Spectral data is consistent with that of previous reported.

<sup>1</sup>H NMR (400 MHz, CDCl<sub>3</sub>) δ 7.26 (m, 2H), 7.17 (m, 2H), 6.97 – 6.88 (m, 4H), 6.87 – 6.78 (m, 3H), 5.43 (t, *J* = 1.4 Hz, 2H).

<sup>13</sup>C NMR (100 MHz, CDCl<sub>3</sub>) δ 148.6, 146.9, 141.9, 128.8, 124.9, 121.5, 120.8, 118.0, 69.3.

HRMS (ESI) calculated for C<sub>16</sub>H<sub>14</sub>N [M+H]<sup>+</sup> 220.1126, found 220.1127.

#### 6-Methyl-9-phenyl-1,4-dihydro-1,4-epiminonaphthalene (3ab)

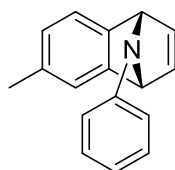

Prepared according to the **general procedure 2** on 0.5 mmol scale and obtained an isolated yield of 63% (74 mg) as a pale brown oil.

<sup>1</sup>H NMR (400 MHz, CDCl<sub>3</sub>) δ 7.08 (ddd, *J* = 13.6, 6.2, 4.8 Hz, 1H), 7.01 (s, 1H), 6.90 – 6.80 (m, 2H), 6.79 – 6.68 (m, 3H), 6.64 (dd, *J* = 7.2, 0.5 Hz, 1H), 5.36 – 5.24 (m, 2H), 2.16 (s, 3H).

<sup>13</sup>C NMR (100 MHz, CDCl<sub>3</sub>) δ 148.8, 147.0, 145.6, 142.2, 141.7, 134.6, 128.8, 125.0, 122.9, 121.2, 120.8, 118.0, 69.3, 69.0, 21.3.

HRMS (ESI) calculated for C<sub>17</sub>H<sub>16</sub>N [M+H]<sup>+</sup> 234.1283, found 234.1276.



**6-(*tert*-Butyl)-9-phenyl-1,4-dihydro-1,4-epiminonaphthalene (3ac)**

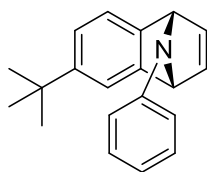

Prepared according to the **general procedure 2** on 0.5 mmol scale and obtained an isolated yield of 57% (78 mg) as a pale yellow oil.

$^1\text{H}$  NMR (400 MHz,  $\text{CDCl}_3$ )  $\delta$  7.27 (d,  $J = 1.5$  Hz, 1H), 7.10 (m, 3H), 6.86 (dd,  $J = 7.5, 1.7$  Hz, 1H), 6.80 (m, 2H), 6.78 – 6.73 (m, 3H), 5.33 (m, 2H), 1.19 (s, 9H).

$^{13}\text{C}$  NMR (100 MHz,  $\text{CDCl}_3$ )  $\delta$  148.5, 148.1, 147.0, 145.4, 141.6, 141.4, 128.8, 121.2, 120.8, 120.6, 119.1, 118.1, 69.6, 69.2, 34.7, 31.6.

HRMS (ESI) calculated for  $\text{C}_{20}\text{H}_{22}\text{N}$   $[\text{M}+\text{H}]^+$  276.1752, found 276.1749.

**6-Fluoro-9-phenyl-1,4-dihydro-1,4-epiminonaphthalene (3ad)**

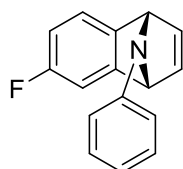

Prepared according to the **general procedure 2** on 0.5 mmol scale and obtained an isolated yield of 77% (92 mg) as a pale yellow oil.

$^1\text{H}$  NMR (400 MHz,  $\text{CDCl}_3$ )  $\delta$  7.13 – 7.03 (m, 3H), 6.92 (dd,  $J = 7.8, 2.3$  Hz, 1H), 6.90 – 6.81 (m, 2H), 6.80 – 6.68 (m, 3H), 6.50 (ddd,  $J = 10.0, 7.8, 2.3$  Hz, 1H), 5.38 – 5.24 (m, 2H).

$^{13}\text{C}$  NMR (100 MHz,  $\text{CDCl}_3$ )  $\delta$  160.5 (d,  $J_{\text{C-F}} = 242.9$  Hz), 151.4 (d,  $J_{\text{C-F}} = 9.0$  Hz), 146.63, 143.8 (d,  $J_{\text{C-F}} = 3.0$  Hz), 142.45, 141.44, 128.91, 121.9 (d,  $J_{\text{C-F}} = 9.0$  Hz), 121.07, 117.95, 110.7 (d,  $J_{\text{C-F}} = 25.0$  Hz), 110.4 (d,  $J_{\text{C-F}} = 22.0$  Hz), 69.3 (d,  $J_{\text{C-F}} = 3.0$  Hz), 68.78.

$^{19}\text{F}$  NMR (376 MHz,  $\text{CDCl}_3$ )  $\delta$  -117.76 (s, 1F).

HRMS (ESI) calculated for  $\text{C}_{16}\text{H}_{13}\text{NF}$   $[\text{M}+\text{H}]^+$  238.1032, found 238.1038.

**6-Chloro-9-phenyl-1,4-dihydro-1,4-epiminonaphthalene (3ae)**

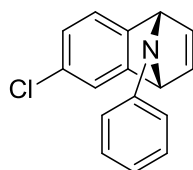

Prepared according to the **general procedure 2** on 0.5 mmol scale and obtained an isolated yield of 87% (110 mg) as a pale brown oil.

$^1\text{H}$  NMR (400 MHz,  $\text{CDCl}_3$ )  $\delta$  7.15 (m, 1H), 7.12 – 7.04 (m, 3H), 6.88 – 6.79 (m, 3H), 6.79 – 6.74 (m, 1H), 6.72 (m, 2H), 5.31 (m, 2H).

$^{13}\text{C}$  NMR (100 MHz,  $\text{CDCl}_3$ )  $\delta$  150.9, 147.1, 146.5, 142.2, 141.6, 130.6, 128.9, 124.6, 122.5, 122.3, 121.1, 117.9, 69.1, 68.8.

HRMS (ESI) calculated for  $\text{C}_{16}\text{H}_{13}\text{NCl}$   $[\text{M}+\text{H}]^+$  254.0737, found 254.0730.

### 6-Bromo-9-phenyl-1,4-dihydro-1,4-epiminonaphthalene (3af)

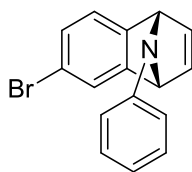

Prepared according to the **general procedure 2** on 0.5 mmol scale and obtained an isolated yield of 96% (143 mg) as a yellow oil.

$^1\text{H}$  NMR (400 MHz,  $\text{CDCl}_3$ )  $\delta$  7.30 (d,  $J = 1.6$  Hz, 1H), 7.13 – 7.06 (m, 2H), 7.03 (d,  $J = 7.5$  Hz, 1H), 6.98 (dd,  $J = 7.5, 1.7$  Hz, 1H), 6.90 – 6.81 (m, 2H), 6.80 – 6.74 (m, 1H), 6.74 – 6.69 (m, 2H), 5.35 – 5.24 (m, 2H).

$^{13}\text{C}$  NMR (100 MHz,  $\text{CDCl}_3$ )  $\delta$  151.2, 147.7, 146.4, 142.2, 141.7, 128.9, 127.6, 125.2, 122.8, 121.1, 118.6, 117.9, 69.1, 68.9.

HRMS (ESI) calculated for  $\text{C}_{16}\text{H}_{13}\text{NBr}$   $[\text{M}+\text{H}]^+$  298.0231, found 298.0231.

### 9-Phenyl-1,4-dihydro-1,4-epiminonaphthalene-6-carbonitrile (3ag)

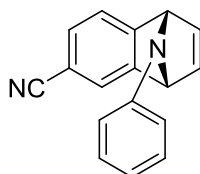

Prepared according to the **general procedure 2** on 0.5 mmol scale and obtained an isolated yield of 71% (87 mg) as a white solid.

m.p.: 187-188 °C.

$^1\text{H}$  NMR (400 MHz,  $\text{CDCl}_3$ )  $\delta$  7.39 (s, 1H), 7.26 (m, 1H), 7.22 (m, 1H), 7.15 – 7.06 (m, 2H), 6.94 – 6.85 (m, 2H), 6.79 (t,  $J = 7.4$  Hz, 1H), 6.72 (dd,  $J = 8.6, 0.9$  Hz, 2H), 5.54 – 5.10 (m, 2H).

$^{13}\text{C}$  NMR (100 MHz,  $\text{CDCl}_3$ )  $\delta$  154.2, 150.0, 145.9, 142.1, 141.5, 130.8, 129.0, 124.1, 122.0, 121.5, 119.3, 117.8, 108.6, 69.2, 68.8.

HRMS (ESI) calculated for  $\text{C}_{17}\text{H}_{13}\text{N}_2$   $[\text{M}+\text{H}]^+$  245.1079, found 245.1070.

### 6-Nitro-9-phenyl-1,4-dihydro-1,4-epiminonaphthalene (3ah)

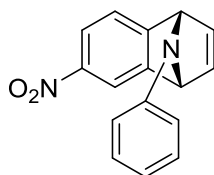

Prepared according to the **general procedure 2** on 0.5 mmol scale and obtained an isolated yield of 70% (92 mg) as a yellow oil.

$^1\text{H}$  NMR (400 MHz,  $\text{CDCl}_3$ )  $\delta$  7.97 (d,  $J = 1.9$  Hz, 1H), 7.83 (m, 1H), 7.27 (d,  $J = 7.8$  Hz, 1H), 7.17 – 7.04 (m, 2H), 6.93 (d,  $J = 2.4$  Hz, 1H), 6.89 (d,  $J = 2.4$  Hz, 1H), 6.78 (t,  $J = 7.4$  Hz, 1H), 6.72 (m, 2H), 5.43 (m, 2H).

$^{13}\text{C}$  NMR (100 MHz,  $\text{CDCl}_3$ )  $\delta$  156.2, 150.8, 145.9, 145.7, 142.5, 141.4, 129.1, 122.3, 121.5, 121.4, 117.8, 116.5, 69.0, 69.0.

HRMS (ESI) calculated for  $\text{C}_{16}\text{H}_{11}\text{N}_2\text{O}_2$   $[\text{M}-\text{H}]^+$  263.0821, found 263.0825.

**9-Phenyl-6-(trifluoromethyl)-1,4-dihydro-1,4-epiminonaphthalene (3ai)**

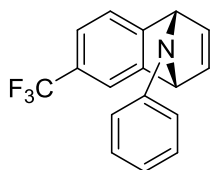

Prepared according to the **general procedure 2** on 0.5 mmol scale and obtained an isolated yield of 77% (110 mg) as a pale yellow oil.

$^1\text{H}$  NMR (400 MHz,  $\text{CDCl}_3$ )  $\delta$  7.39 (s, 1H), 7.24 (d,  $J = 7.4$  Hz, 1H), 7.18 – 7.13 (m, 1H), 7.10 (t,  $J = 7.9$  Hz, 2H), 6.90 – 6.81 (m, 2H), 6.81 – 6.69 (m, 3H), 5.39 (m, 2H).

$^{13}\text{C}$  NMR (100 MHz,  $\text{CDCl}_3$ )  $\delta$  152.8, 149.8, 146.3, 142.0, 141.6, 129.0, 127.3 (q,  $J_{\text{C-F}} = 31.7$  Hz), 124.3 (q,  $J_{\text{C-F}} = 270.5$  Hz), 122.9 (q,  $J_{\text{C-F}} = 4.0$  Hz), 121.3, 121.2, 118.1 (q,  $J_{\text{C-F}} = 4.0$  Hz), 117.9, 69.1.

$^{19}\text{F}$  NMR (376 MHz,  $\text{CDCl}_3$ )  $\delta$  -61.84 (s, 3F).

HRMS (ESI) calculated for  $\text{C}_{17}\text{H}_{13}\text{NF}_3$   $[\text{M}+\text{H}]^+$  288.1000, found 288.1003.

**9-Phenyl-6-(trifluoromethoxy)-1,4-dihydro-1,4-epiminonaphthalene (3aj)**

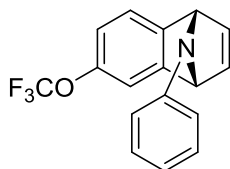

Prepared according to the **general procedure 2** on 0.5 mmol scale and obtained an isolated yield of 88% (134 mg) as a yellow oil.

$^1\text{H}$  NMR (400 MHz,  $\text{CDCl}_3$ )  $\delta$  7.14 – 7.07 (m, 3H), 7.05 (s, 1H), 6.87 – 6.80 (m, 2H), 6.80 – 6.75 (m, 1H), 6.75 – 6.66 (m, 3H), 5.34 (m, 2H).

$^{13}\text{C}$  NMR (100 MHz,  $\text{CDCl}_3$ )  $\delta$  151.2, 147.2, 146.5, 146.4, 142.0, 141.6, 129.0, 121.7, 121.2, 120.5 (q,  $J_{\text{C-F}} = 255.1$  Hz), 118.0, 117.1, 115.6, 69.3, 69.0.

$^{19}\text{F}$  NMR (376 MHz,  $\text{CDCl}_3$ )  $\delta$  -57.88 (s, 3F).

HRMS (ESI) calculated for  $\text{C}_{17}\text{H}_{13}\text{NOF}_3$   $[\text{M}+\text{H}]^+$  304.0949, found 304.0944.

**6,9-Diphenyl-1,4-dihydro-1,4-epiminonaphthalene (3ak)**

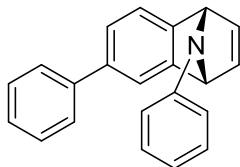

Prepared according to the **general procedure 2** on 0.5 mmol scale and obtained an isolated yield of 89% (131 mg) as a yellow oil.

$^1\text{H}$  NMR (400 MHz,  $\text{CDCl}_3$ )  $\delta$  7.42 (m, 3H), 7.30 (m, 2H), 7.20 (m, 2H), 7.14 – 7.01 (m, 3H), 6.91 – 6.81 (m, 2H), 6.75 (m, 3H), 5.42 – 5.31 (m, 2H).

$^{13}\text{C}$  NMR (100 MHz,  $\text{CDCl}_3$ )  $\delta$  149.5, 147.6, 146.9, 141.9, 141.8, 141.4, 138.4, 128.9, 128.7, 127.2, 127.1, 124.0, 121.6, 121.0, 120.8, 118.1, 69.4, 69.2.

HRMS (ESI) calculated for  $\text{C}_{22}\text{H}_{18}\text{N}$   $[\text{M}+\text{H}]^+$  296.1439, found 296.1432.

### 5,9-Diphenyl-1,4-dihydro-1,4-epiminonaphthalene (3al)

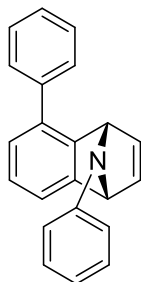

Prepared according to the **general procedure 2** on 0.5 mmol scale and obtained an isolated yield of 82% (121 mg) as a yellow oil.

$^1\text{H}$  NMR (400 MHz,  $\text{CDCl}_3$ )  $\delta$  7.44 – 7.35 (m, 2H), 7.35 – 7.27 (m, 3H), 7.17 (dd,  $J$  = 5.4, 2.6 Hz, 1H), 7.08 – 7.00 (m, 2H), 6.96 (dd,  $J$  = 5.4, 2.2 Hz, 1H), 6.95 – 6.88 (m, 3H), 6.76 – 6.69 (m, 1H), 6.66 (dd,  $J$  = 8.6, 1.0 Hz, 2H), 5.46 (m, 1H), 5.42 – 5.37 (m, 1H).

$^{13}\text{C}$  NMR (100 MHz,  $\text{CDCl}_3$ )  $\delta$  148.7, 146.8, 146.4, 142.2, 141.6, 140.0, 135.9, 128.8, 128.8, 128.3, 127.4, 125.2, 120.9, 120.5, 118.0, 69.6, 68.4.

HRMS (ESI) calculated for  $\text{C}_{22}\text{H}_{18}\text{N}$   $[\text{M}+\text{H}]^+$  296.1439, found 296.1436.

### 3-Chloro-9-phenyl-5,8-dihydro-5,8-epiminoisoquinoline (3am)

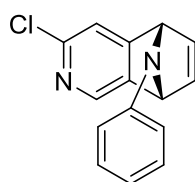

Prepared according to the **general procedure 2** on 0.5 mmol scale and obtained an isolated yield of 80% (102 mg) as a yellow oil.

$^1\text{H}$  NMR (400 MHz,  $\text{CDCl}_3$ )  $\delta$  8.07 (s, 1H), 7.14 (s, 1H), 7.14 – 7.08 (m, 2H), 6.91 (m, 1H), 6.85 – 6.76 (m, 2H), 6.70 (m, 2H), 5.40 (m, 1H), 5.34 (m, 1H).

$^{13}\text{C}$  NMR (100 MHz,  $\text{CDCl}_3$ )  $\delta$  162.1, 148.4, 145.6, 143.2, 142.7, 140.5, 140.1, 129.1, 121.7, 118.6, 117.7, 68.6, 66.7.

HRMS (ESI) calculated for  $\text{C}_{15}\text{H}_{10}\text{N}_2\text{Cl}$   $[\text{M}-\text{H}]^+$  253.0533, found 253.0536.

### 9-Phenyl-1,4-dihydro-1,4-epiminonaphthalene-5-carbonitrile (3an)

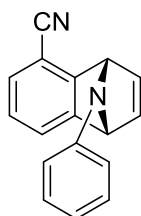

Prepared according to the **general procedure 2** on 0.5 mmol scale and obtained an isolated yield of 71% (86 mg) as a pale yellow oil.

$^1\text{H}$  NMR (400 MHz,  $\text{CDCl}_3$ )  $\delta$  7.33 (d,  $J$  = 7.1 Hz, 1H), 7.15 – 7.07 (m, 2H), 7.06 – 7.01 (m, 1H), 6.96 – 6.86 (m, 3H), 6.83 – 6.75 (m, 1H), 6.75 – 6.70 (m, 2H), 5.60 (m, 1H), 5.41 (m, 1H).

$^{13}\text{C}$  NMR (100 MHz,  $\text{CDCl}_3$ )  $\delta$  154.3, 150.3, 145.8, 142.8, 141.2, 129.1, 127.0, 126.0, 125.2, 121.5,

117.8, 117.2, 106.3, 69.5, 68.3.

HRMS (ESI) calculated for  $C_{17}H_{13}N_2$   $[M+H]^+$  245.1079, found 245.1070.

### 5-Fluoro-9-phenyl-1,4-dihydro-1,4-epiminonaphthalene (3ao)

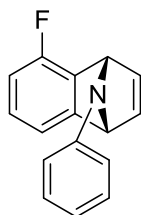

Prepared according to the **general procedure 2** on 0.5 mmol scale and obtained an isolated yield of 78% (92 mg) as a yellow oil.

$^1H$  NMR (400 MHz,  $CDCl_3$ )  $\delta$  7.12 – 7.03 (m, 2H), 6.95 (d,  $J$  = 7.0 Hz, 1H), 6.90 – 6.86 (m, 2H), 6.82 – 6.76 (m, 1H), 6.76 – 6.70 (m, 3H), 6.54 (td,  $J$  = 8.4, 0.6 Hz, 1H), 5.60 (m, 1H), 5.35 (m, 1H).

$^{13}C$  NMR (100 MHz,  $CDCl_3$ )  $\delta$  157.4 (d,  $J_{C-F}$  = 244.3 Hz), 152.3 (d,  $J_{C-F}$  = 4.6 Hz), 146.5, 142.3, 141.6, 133.0 (d,  $J_{C-F}$  = 20.5 Hz), 129.0, 127.3 (d,  $J_{C-F}$  = 6.0 Hz), 121.2, 117.9, 117.7 (d,  $J_{C-F}$  = 2.6 Hz), 113.6 (d,  $J_{C-F}$  = 22.1 Hz), 69.6, 65.7.

$^{19}F$  NMR (376 MHz,  $CDCl_3$ )  $\delta$  -121.42 (s, 1F).

HRMS (ESI) calculated for  $C_{16}H_{13}NF$   $[M+H]^+$  238.1032, found 238.1026.

### 5-Methyl-9-phenyl-1,4-dihydro-1,4-epiminonaphthalene (3ap)

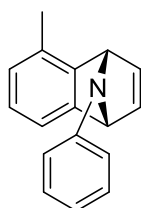

Prepared according to the **general procedure 2** on 0.5 mmol scale and obtained an isolated yield of 60% (70 mg) as a yellow oil.

$^1H$  NMR (400 MHz,  $CDCl_3$ )  $\delta$  7.08 (m, 2H), 7.00 (d,  $J$  = 6.8 Hz, 1H), 6.84 (s, 2H), 6.74 (m, 4H), 6.65 (d,  $J$  = 7.7 Hz, 1H), 5.44 (m, 1H), 5.33 (m, 1H), 2.26 (s, 3H).

$^{13}C$  NMR (100 MHz,  $CDCl_3$ )  $\delta$  148.2, 147.1, 146.9, 142.0, 141.4, 130.8, 128.8, 126.6, 124.9, 120.8, 119.0, 118.0, 69.7, 67.4, 18.2.

HRMS (ESI) calculated for  $C_{17}H_{16}N$   $[M+H]^+$  234.1283, found 234.1281.

### 5,7-Difluoro-9-phenyl-1,4-dihydro-1,4-epiminonaphthalene (3aq)

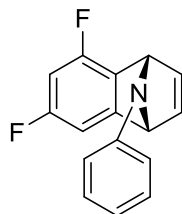

Prepared according to the **general procedure 2** on 0.5 mmol scale and obtained an isolated yield of 48% (62 mg) as a yellow oil.

$^1\text{H}$  NMR (400 MHz,  $\text{CDCl}_3$ )  $\delta$  7.13 – 7.06 (m, 2H), 6.90 (qdd,  $J = 5.5, 2.4, 0.4$  Hz, 2H), 6.80 – 6.74 (m, 2H), 6.73 – 6.69 (m, 2H), 6.29 (ddd,  $J = 9.6, 8.2, 1.9$  Hz, 1H), 5.62 – 5.49 (m, 1H), 5.38 – 5.25 (m, 1H).

$^{13}\text{C}$  NMR (100 MHz,  $\text{CDCl}_3$ )  $\delta$  161.0 (dd,  $J_{\text{C-F}} = 246.9, 9.2$  Hz), 156.4 (dd,  $J_{\text{C-F}} = 246.2, 12.7$  Hz), 153.9 (dd,  $J_{\text{C-F}} = 9.4, 6.0$  Hz), 146.2, 142.1, 141.8, 129.0, 128.6 (dd,  $J_{\text{C-F}} = 21.1, 3.2$  Hz), 121.4, 117.8, 107.3 (dd,  $J_{\text{C-F}} = 25.0, 4.0$  Hz), 100.6 (t,  $J_{\text{C-F}} = 26.2$  Hz), 69.7, 65.4 (d,  $J_{\text{C-F}} = 1.4$  Hz).

$^{19}\text{F}$  NMR (376 MHz,  $\text{CDCl}_3$ )  $\delta$  -113.42 (d,  $J = 5.6$  Hz, 1F), -117.91 (d,  $J = 5.6$  Hz, 1F).

HRMS (ESI) calculated for  $\text{C}_{16}\text{H}_{12}\text{NF}_2$   $[\text{M}+\text{H}]^+$  256.0938, found 256.0947.

### 5,6-Dimethyl-9-phenyl-1,4-dihydro-1,4-epiminonaphthalene (3ar)

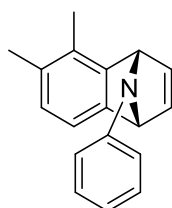

Prepared according to the **general procedure 2** on 0.5 mmol scale and obtained an isolated yield of 62% (76 mg) as a yellow oil.

$^1\text{H}$  NMR (400 MHz,  $\text{CDCl}_3$ )  $\delta$  7.16 (m, 2H), 6.99 (d,  $J = 7.1$  Hz, 1H), 6.95 – 6.87 (m, 2H), 6.85 – 6.76 (m, 3H), 6.69 (d,  $J = 7.1$  Hz, 1H), 5.52 (m, 1H), 5.37 (m, 1H), 2.25 (s, 3H), 2.15 (s, 3H).

$^{13}\text{C}$  NMR (100 MHz,  $\text{CDCl}_3$ )  $\delta$  147.2, 145.6, 142.3, 141.3, 133.6, 130.2, 128.8, 125.6, 120.7, 118.8, 118.0, 69.6, 67.7, 19.6, 15.6.

HRMS (ESI) calculated for  $\text{C}_{18}\text{H}_{18}\text{N}$   $[\text{M}+\text{H}]^+$  248.1439, found 248.1448.

### 5,7-Dimethyl-9-phenyl-1,4-dihydro-1,4-epiminonaphthalene (3as)

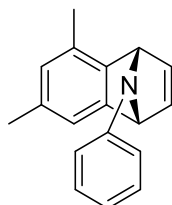

Prepared according to the **general procedure 2** on 0.5 mmol scale and obtained an isolated yield of 58% (72 mg) as a yellow oil.

$^1\text{H}$  NMR (400 MHz,  $\text{CDCl}_3$ )  $\delta$  7.20 – 7.12 (m, 2H), 6.94 – 6.89 (m, 3H), 6.84 – 6.77 (m, 3H), 6.54 (s, 1H), 5.47 (m, 1H), 5.36 (m, 1H), 2.29 (s, 3H), 2.20 (s, 3H).

$^{13}\text{C}$  NMR (100 MHz,  $\text{CDCl}_3$ )  $\delta$  148.5, 147.2, 143.9, 141.8, 141.7, 134.5, 130.5, 128.8, 126.8, 120.7, 120.4, 118.0, 69.6, 67.1, 21.2, 18.1.

HRMS (ESI) calculated for  $\text{C}_{18}\text{H}_{18}\text{N}$   $[\text{M}+\text{H}]^+$  248.1439, found 248.1442.

**9-(*p*-Tolyl)-1,4-dihydro-1,4-epiminonaphthalene (3ba)**

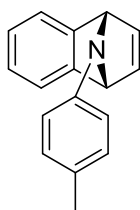

Prepared according to the **general procedure 2** on 0.5 mmol scale and obtained an isolated yield of 81% (94 mg) as a pale brown solid.

m.p.: 123-125 °C.

<sup>1</sup>H NMR (400 MHz, CDCl<sub>3</sub>) δ 7.34 – 7.25 (m, 2H), 7.02 (d, *J* = 8.2 Hz, 2H), 6.99 – 6.93 (m, 4H), 6.78 (d, *J* = 8.4 Hz, 2H), 5.43 (t, *J* = 1.3 Hz, 2H), 2.25 (s, 3H).

<sup>13</sup>C NMR (100 MHz, CDCl<sub>3</sub>) δ 148.6, 144.6, 141.8, 130.1, 129.4, 124.9, 121.5, 118.1, 69.5, 20.6.

HRMS (ESI) calculated for C<sub>17</sub>H<sub>16</sub>N [M+H]<sup>+</sup> 234.1283, found 234.1281.

**9-(4-(*tert*-Butyl)phenyl)-1,4-dihydro-1,4-epiminonaphthalene (3ca)**

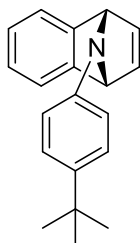

Prepared according to the **general procedure 2** on 0.5 mmol scale and obtained an isolated yield of 83% (114 mg) as a white solid.

m.p.: 107-109 °C.

<sup>1</sup>H NMR (400 MHz, CDCl<sub>3</sub>) δ 7.33 – 7.28 (m, 2H), 7.24 – 7.22 (m, 1H), 7.22 – 7.19 (m, 1H), 6.97 (dd, *J* = 5.1, 3.0 Hz, 2H), 6.95 (t, *J* = 1.4 Hz, 2H), 6.82 – 6.80 (m, 1H), 6.79 – 6.77 (m, 1H), 5.44 (t, *J* = 1.3 Hz, 2H), 1.28 (s, 9H).

<sup>13</sup>C NMR (100 MHz, CDCl<sub>3</sub>) δ 148.8, 144.3, 143.4, 141.8, 125.6, 124.8, 121.4, 117.7, 69.5, 34.0, 31.4.

HRMS (ESI) calculated for C<sub>20</sub>H<sub>22</sub>N [M+H]<sup>+</sup> 276.1752, found 276.1745.

**9-(4-Methoxyphenyl)-1,4-dihydro-1,4-epiminonaphthalene (3da)**

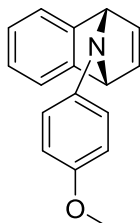

Prepared according to the **general procedure 2** on 0.5 mmol scale and obtained an isolated yield of 62% (77 mg) as a yellow oil.

<sup>1</sup>H NMR (400 MHz, CDCl<sub>3</sub>) δ 7.16 (dd, *J* = 5.1, 3.0 Hz, 2H), 6.86 – 6.80 (m, 4H), 6.70 – 6.62 (m, 4H), 5.24 (t, *J* = 1.4 Hz, 2H), 3.61 (s, 3H).

<sup>13</sup>C NMR (100 MHz, CDCl<sub>3</sub>) δ 154.1, 148.6, 141.7, 140.7, 124.9, 121.5, 119.4, 114.2, 69.9, 55.4.

HRMS (ESI) calculated for C<sub>17</sub>H<sub>16</sub>NO [M+H]<sup>+</sup> 250.1232, found 250.1233.

**9-(4-Fluorophenyl)-1,4-dihydro-1,4-epiminonaphthalene (3ea)**

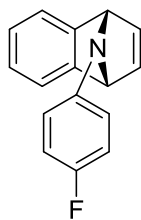

Prepared according to the **general procedure 2** on 0.5 mmol scale and obtained an isolated yield of 82% (97 mg) as a yellow oil.

$^1\text{H}$  NMR (400 MHz,  $\text{CDCl}_3$ )  $\delta$  7.20 – 7.10 (m, 2H), 6.87 – 6.82 (m, 4H), 6.78 (t,  $J$  = 8.7 Hz, 2H), 6.73 – 6.61 (m, 2H), 5.26 (t,  $J$  = 1.4 Hz, 2H).

$^{13}\text{C}$  NMR (100 MHz,  $\text{CDCl}_3$ )  $\delta$  157.7 (d,  $J_{\text{C-F}}$  = 237.7 Hz), 148.3, 143.3 (d,  $J_{\text{C-F}}$  = 2.4 Hz), 141.8, 125.0, 121.6, 119.2 (d,  $J_{\text{C-F}}$  = 7.6 Hz), 115.4 (d,  $J_{\text{C-F}}$  = 22.1 Hz), 69.8.

$^{19}\text{F}$  NMR (376 MHz,  $\text{CDCl}_3$ )  $\delta$  -123.68 (s, 1F).

HRMS (ESI) calculated for  $\text{C}_{16}\text{H}_{13}\text{NF}$   $[\text{M}+\text{H}]^+$  238.1032, found 238.1042.

**9-(4-Chlorophenyl)-1,4-dihydro-1,4-epiminonaphthalene (3fa)**

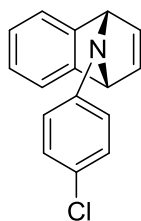

Prepared according to the **general procedure 2** on 0.5 mmol scale and obtained an isolated yield of 81% (103 mg) as a yellow solid.

m.p.: 139-141 °C.

$^1\text{H}$  NMR (400 MHz,  $\text{CDCl}_3$ )  $\delta$  7.21 – 7.14 (m, 2H), 7.06 – 7.04 (m, 1H), 7.03 – 7.01 (m, 1H), 6.90 – 6.81 (m, 4H), 6.70 – 6.66 (m, 1H), 6.66 – 6.64 (m, 1H), 5.29 (t,  $J$  = 1.4 Hz, 2H).

$^{13}\text{C}$  NMR (100 MHz,  $\text{CDCl}_3$ )  $\delta$  148.2, 145.6, 141.9, 128.8, 125.9, 125.1, 121.6, 119.2, 69.4.

HRMS (ESI) calculated for  $\text{C}_{16}\text{H}_{13}\text{NCl}$   $[\text{M}+\text{H}]^+$  254.0737, found 254.0739.

**9-(4-Bromophenyl)-1,4-dihydro-1,4-epiminonaphthalene (3ga)**

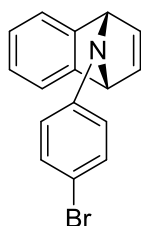

Prepared according to the **general procedure 2** on 0.5 mmol scale and obtained an isolated yield of 71% (106 mg) as a yellow solid.

m.p.: 147-148 °C.



$^1\text{H}$  NMR (400 MHz,  $\text{CDCl}_3$ )  $\delta$  7.35 – 7.06 (m, 4H), 6.98 – 6.77 (m, 4H), 6.64 – 6.61 (m, 1H), 6.61 – 6.59 (m, 1H), 5.29 (t,  $J$  = 1.4 Hz, 2H).

$^{13}\text{C}$  NMR (100 MHz,  $\text{CDCl}_3$ )  $\delta$  148.2, 146.1, 141.9, 131.7, 125.1, 121.6, 119.6, 113.3, 69.3.

HRMS (ESI) calculated for  $\text{C}_{16}\text{H}_{13}\text{NBr}$   $[\text{M}+\text{H}]^+$  298.0231, found 298.0223.

**9-(4-(Trifluoromethyl)phenyl)-1,4-dihydro-1,4-epiminonaphthalene (3ha)**

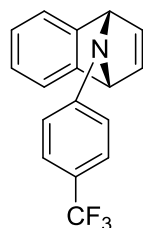

Prepared according to the **general procedure 2** on 0.5 mmol scale and obtained an isolated yield of 90% (129 mg) as a pale yellow solid.

m.p.: 97-99 °C.

$^1\text{H}$  NMR (400 MHz,  $\text{CDCl}_3$ )  $\delta$  7.33 (d,  $J$  = 8.5 Hz, 2H), 7.20 (dd,  $J$  = 5.1, 3.0 Hz, 2H), 6.93 – 6.84 (m, 4H), 6.79 (d,  $J$  = 8.4 Hz, 2H), 5.40 (t,  $J$  = 1.4 Hz, 2H).

$^{13}\text{C}$  NMR (100 MHz,  $\text{CDCl}_3$ )  $\delta$  149.7, 148.0, 142.0, 126.2 (q,  $J_{\text{C-F}}$  = 3.7 Hz), 125.2, 124.5 (q,  $J_{\text{C-F}}$  = 269.4 Hz), 122.4 (q,  $J_{\text{C-F}}$  = 32.4 Hz), 121.6, 117.2, 68.9.

$^{19}\text{F}$  NMR (376 MHz,  $\text{CDCl}_3$ )  $\delta$  -61.57 (s, 3F).

HRMS (ESI) calculated for  $\text{C}_{17}\text{H}_{13}\text{NF}_3$   $[\text{M}+\text{H}]^+$  288.1000, found 288.0992.

**9-(4-(Trifluoromethoxy)phenyl)-1,4-dihydro-1,4-epiminonaphthalene (3ia)**

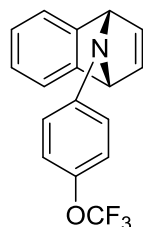

Prepared according to the **general procedure 2** on 0.5 mmol scale and obtained an isolated yield of 83% (126 mg) as a pale yellow solid.

m.p.: 74-76 °C.

$^1\text{H}$  NMR (400 MHz,  $\text{CDCl}_3$ )  $\delta$  7.29 – 7.21 (m, 2H), 7.01 (d,  $J$  = 8.4 Hz, 2H), 6.98 – 6.90 (m, 4H), 6.81 – 6.79 (m, 1H), 6.79 – 6.75 (m, 1H), 5.38 (t,  $J$  = 1.3 Hz, 2H).

$^{13}\text{C}$  NMR (100 MHz,  $\text{CDCl}_3$ )  $\delta$  148.20, 145.71, 143.02, 141.86, 125.09, 121.83, 121.67, 121.56, 119.28, 118.69, 69.45.

$^{13}\text{C}$  NMR (100 MHz,  $\text{CDCl}_3$ )  $\delta$  148.2, 145.7, 143.0, 141.9, 125.1, 121.7, 121.6, 120.6 (q,  $J_{\text{C-F}}$  = 254.4 Hz), 118.7, 69.4.

$^{19}\text{F}$  NMR (376 MHz,  $\text{CDCl}_3$ )  $\delta$  -58.16 (s, 3F).

HRMS (ESI) calculated for  $\text{C}_{17}\text{H}_{13}\text{NOF}_3$   $[\text{M}+\text{H}]^+$  304.0949, found 304.0950.

**4-(1,4-Dihydro-1,4-epiminonaphthalen-9-yl)benzonitrile (3ja)**

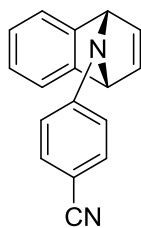

Prepared according to the **general procedure 2** on 0.5 mmol scale and obtained an isolated yield of 93% (114 mg) as a white solid.

m.p.: 191-193 °C.

$^1\text{H}$  NMR (400 MHz,  $\text{CDCl}_3$ )  $\delta$  7.47 – 7.42 (m, 1H), 7.42 – 7.39 (m, 1H), 7.31 – 7.22 (m, 2H), 6.98 (t,  $J$  = 1.5 Hz, 2H), 6.94 (dd,  $J$  = 5.1, 3.0 Hz, 2H), 6.86 – 6.82 (m, 1H), 6.82 – 6.79 (m, 1H), 5.49 (t,  $J$  = 1.4 Hz, 2H).

$^{13}\text{C}$  NMR (100 MHz,  $\text{CDCl}_3$ )  $\delta$  150.4, 147.8, 142.1, 133.2, 125.3, 121.6, 119.6, 117.3, 103.0, 68.5.

HRMS (ESI) calculated for  $\text{C}_{17}\text{H}_{13}\text{N}_2$   $[\text{M}+\text{H}]^+$  245.1079, found 245.1080.

**9-([1,1'-Biphenyl]-4-yl)-1,4-dihydro-1,4-epiminonaphthalene (3ka)**

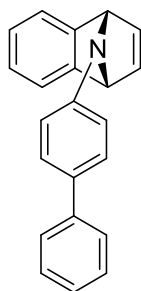

Prepared according to the **general procedure 2** on 0.5 mmol scale and obtained an isolated yield of 40% (59 mg) as a pale brown solid.

m.p.: 146-148 °C.

$^1\text{H}$  NMR (400 MHz,  $\text{CDCl}_3$ )  $\delta$  7.53 – 7.46 (m, 2H), 7.41 (dd,  $J$  = 8.6, 1.9 Hz, 2H), 7.35 (m, 2H), 7.29 – 7.25 (m, 2H), 7.25 – 7.21 (m, 1H), 6.98 – 6.91 (m, 4H), 6.88 (dd,  $J$  = 8.6, 1.6 Hz, 2H), 5.45 (m, 2H).

$^{13}\text{C}$  NMR (100 MHz,  $\text{CDCl}_3$ )  $\delta$  148.6, 146.3, 142.0, 140.8, 133.6, 128.7, 127.5, 126.6, 125.0, 121.5, 118.3, 69.3.

HRMS (ESI) calculated for  $\text{C}_{22}\text{H}_{18}\text{N}$   $[\text{M}+\text{H}]^+$  296.1439, found 296.1440.

## Part 4. Synthesis and characterization of products from isomerization reaction.

### General procedure 3: Synthesis of *N*-phenylamine derivatives.

To an oven-dried Schlenk tube was added 9-phenyl-1,4-dihydro-1,4-epiminonaphthalene (0.5 mmol, 1 equiv) and TsOH·H<sub>2</sub>O (0.1 mmol, 0.2 equiv). The tube was degassed with argon for three times. Then DCE (4 mL) was added via syringe under room temperature. The mixture was stirred at 80 °C until TLC indicated that the starting materials were completely consumed. Then the reaction mixture was cooled down to room temperature and it was quenched with water (20 mL) and extracted with ethyl ether (10 mL) for three times. The combined organic layers were dried with Na<sub>2</sub>SO<sub>4</sub>, filtered and concentrated. The crude products were purified using flash column chromatography on silica gel to afford the desired product.

#### *N*-Phenylisoquinolin-1-amine (4)

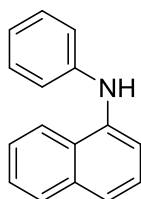

Prepared according to the **general procedure 3** on 0.5 mmol scale and obtained an isolated yield of 93% (102 mg) as a light gray solid. Spectral data is consistent with that of previous reported.<sup>[10]</sup>

<sup>1</sup>H NMR (400 MHz, DMSO) δ 8.30 – 8.08 (m, 2H), 7.89 (m, 1H), 7.59 – 7.44 (m, 3H), 7.40 (t, *J* = 7.8 Hz, 1H), 7.33 (d, *J* = 7.4 Hz, 1H), 7.22 (t, *J* = 7.9 Hz, 2H), 7.13 – 6.99 (m, 2H), 6.82 (t, *J* = 7.3 Hz, 1H).

<sup>13</sup>C NMR (100 MHz, DMSO) δ 145.0, 139.4, 134.4, 129.0, 128.1, 127.0, 126.1, 126.0, 125.0, 122.8, 121.4, 119.5, 117.0, 114.1.

#### 3-Chloro-*N*-phenylisoquinolin-5-amine (5)

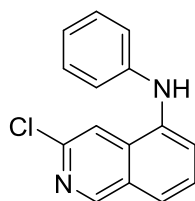

Prepared according to the **general procedure 3** on 0.5 mmol scale and obtained an isolated yield of 75% (96 mg) as a yellow solid.

m.p.: 157-159 °C.

<sup>1</sup>H NMR (400 MHz, DMSO) δ 9.16 (s, 1H), 8.45 (s, 1H), 8.25 (s, 1H), 7.67 (m, 1H), 7.60 – 7.50 (m, 2H), 7.31 (t, *J* = 7.9 Hz, 2H), 7.23 – 7.13 (m, 2H), 6.95 (t, *J* = 7.3 Hz, 1H).

<sup>13</sup>C NMR (100 MHz, DMSO) δ 153.1, 144.0, 143.1, 138.7, 130.4, 129.2, 128.4, 128.3, 121.1, 119.3, 118.5, 115.5, 115.0.

HRMS (ESI) calculated for C<sub>15</sub>H<sub>12</sub>N<sub>2</sub>Cl [M+H]<sup>+</sup> 255.0689, found 255.0692.

## Part 5. Synthesis and characterization of products from hydrogenation reaction.

### General procedure 4: Synthesis of hydrogenation products.

To a stirred solution of 9-phenyl-1,4-dihydro-1,4-epiminonaphthalene (0.5 mmol) in EtOH (20 mL) was carefully added wet Pd/C catalyst (0.05 mmol) under argon atmosphere. The tube was degassed with hydrogen for three times. The mixture was stirred at room temperature until TLC indicated that the starting materials were completely consumed. Then the solid was filtered off and the filtrate was concentrated in vacuo. The crude products were purified using flash column chromatography on silica gel to afford the desired product.

### 9-Phenyl-1,2,3,4-tetrahydro-1,4-epiminonaphthalene (6)

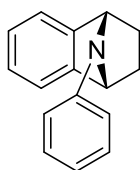

Prepared according to the **general procedure 4** on 0.5 mmol scale and obtained an isolated yield of 63% (70 mg) as a yellow oil.

$^1\text{H}$  NMR (400 MHz,  $\text{CDCl}_3$ )  $\delta$  7.29 – 7.19 (m, 2H), 7.19 – 7.05 (m, 4H), 6.94 – 6.81 (m, 2H), 6.81 – 6.70 (m, 1H), 5.06 (dd,  $J$  = 2.5, 1.8 Hz, 2H), 2.26 – 2.08 (m, 2H), 1.37 – 1.29 (m, 2H).

$^{13}\text{C}$  NMR (100 MHz,  $\text{CDCl}_3$ )  $\delta$  147.4, 145.0, 129.0, 126.4, 120.1, 120.1, 117.2, 63.7, 26.0.

HRMS (ESI) calculated for  $\text{C}_{16}\text{H}_{16}\text{N}$   $[\text{M}+\text{H}]^+$  222.1283, found 222.1277.

## Part 6. References

1. Sundalam, S. K.; Nilova, A.; Seidl, T. L.; Stuart, D. R. *Angew. Chem. Int. Ed.* **2016**, *55*, 8431-8434.
2. Li, J.; Wang, H.; Sun, J.; Yang, Y.; Liu, L. *Org. Biomol. Chem.* **2014**, *12*, 7904-7908.
3. Allen, A. E.; MacMillan, D. C. *J. Am. Chem. Soc.* **2011**, *133*, 4260-4263.
4. Xu, Z.; Li, H.; Ren, Z.; Du, W.; Xu, W.; Lang, J. *Tetrahedron* **2011**, *67*, 5282-5288.
5. Li, Z.; Meng, F.; Zhang, J.; Xie, J.; Dai, B. *Org. Biomol. Chem.* **2016**, *14*, 10861-10865.
6. So, C. M.; Zhou, Z.; Lau, C. P.; Kwong, F. Y. *Angew. Chem. Int. Ed.* **2008**, *47*, 6402-6406.
7. Sarvari, M. H.; Razmi, Z. *RSC Adv.* **2014**, *4*, 44105-44116.
8. Naeimi, H.; Dadaei, M. *RSC Adv.* **2015**, *5*, 76221-76228.
9. Sreedhar, B.; Arundhathi, R.; Reddy, P. L.; Kantam, M. L. *J. Org. Chem.* **2009**, *74*, 7951-7954.
10. Topchiy, M. A.; Dzhevakov, P. B.; Rubina, M. S.; Morozov, O. S.; Asachenko, A. F.; Nechaev, M. S. *Eur. J. Org. Chem.* **2016**, *2016*, 1908-1914.

Part 7. Copies of  $^1\text{H}$ ,  $^{13}\text{C}$ ,  $^{19}\text{F}$  NMR and HRMS (ESI) spectra

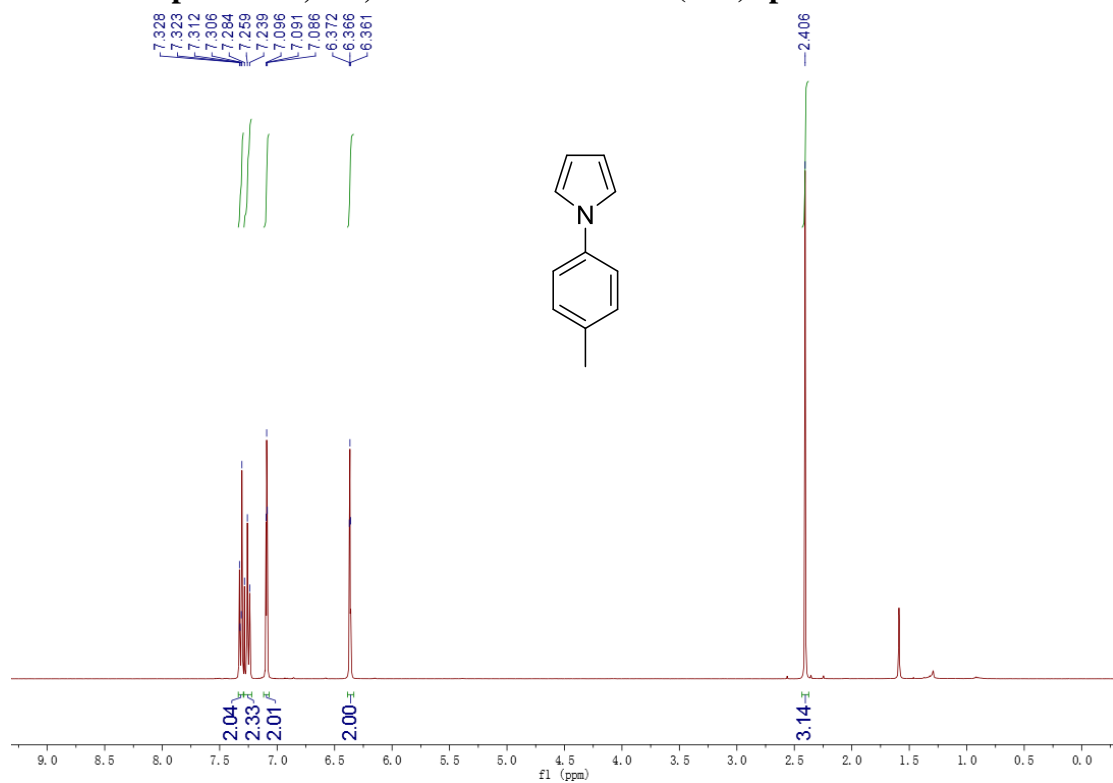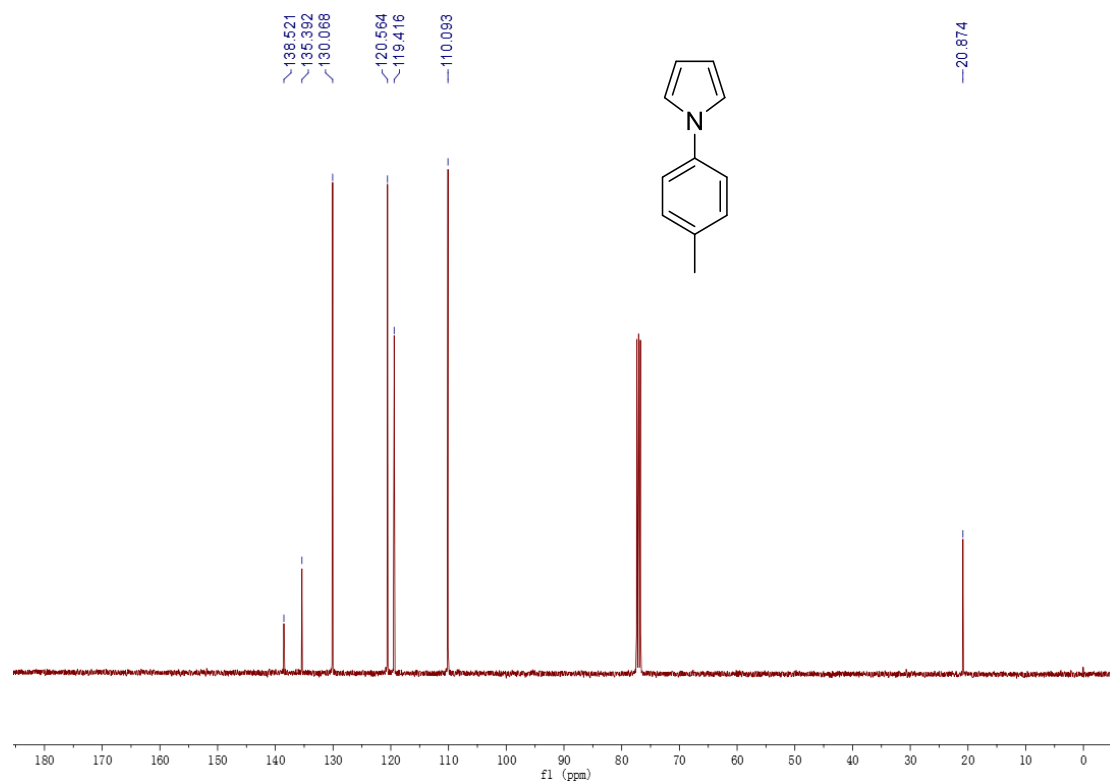

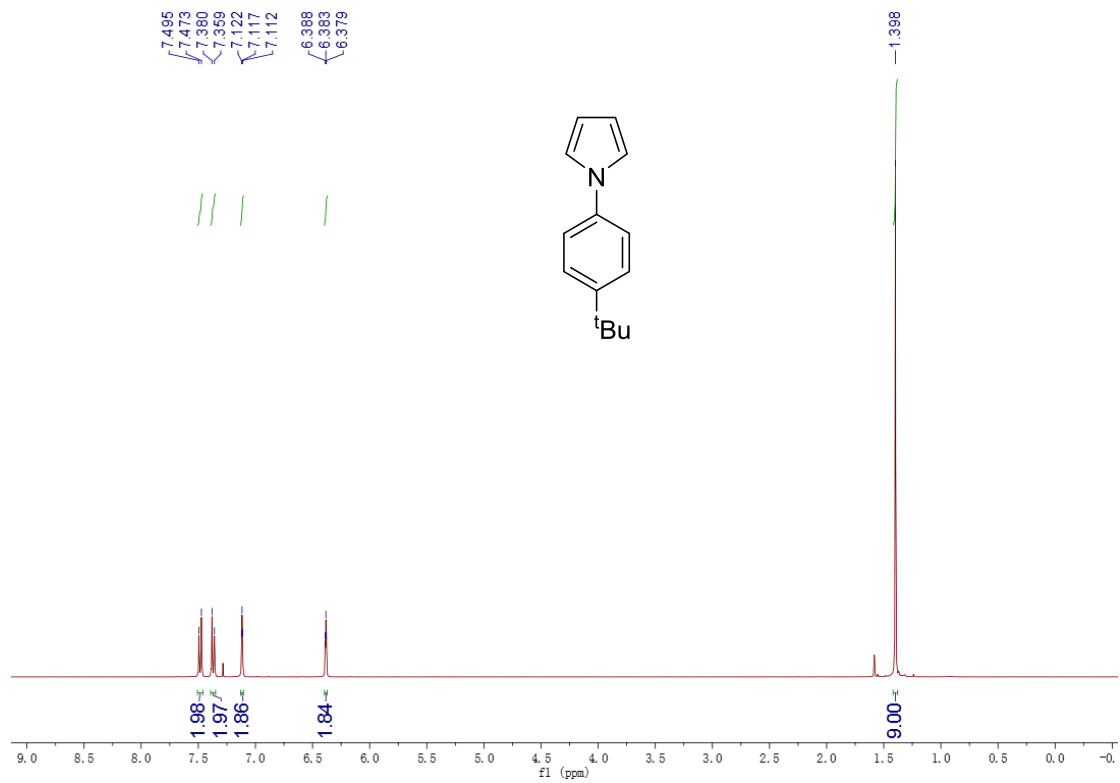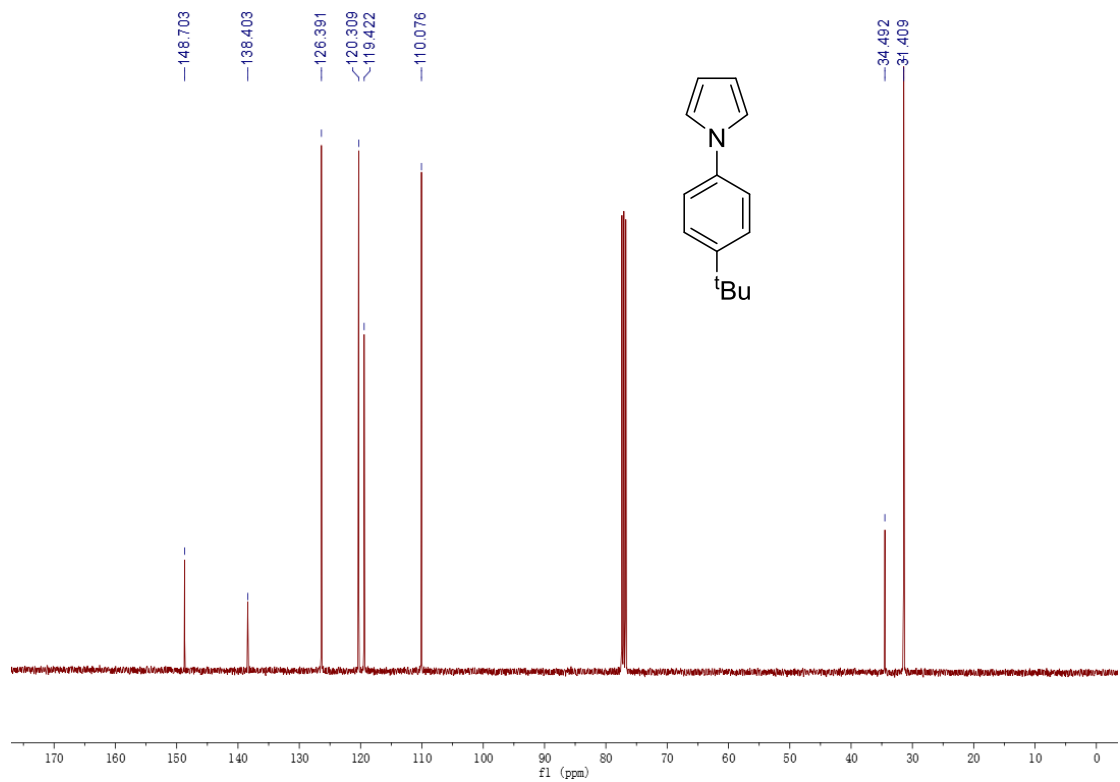

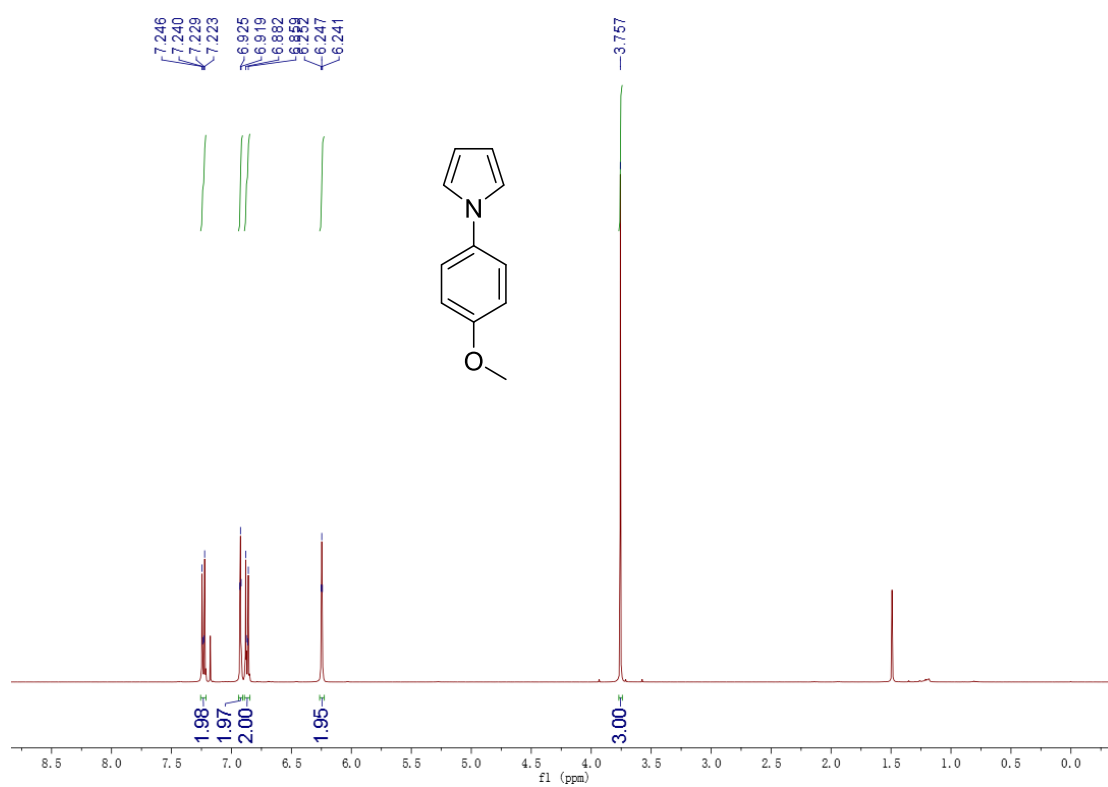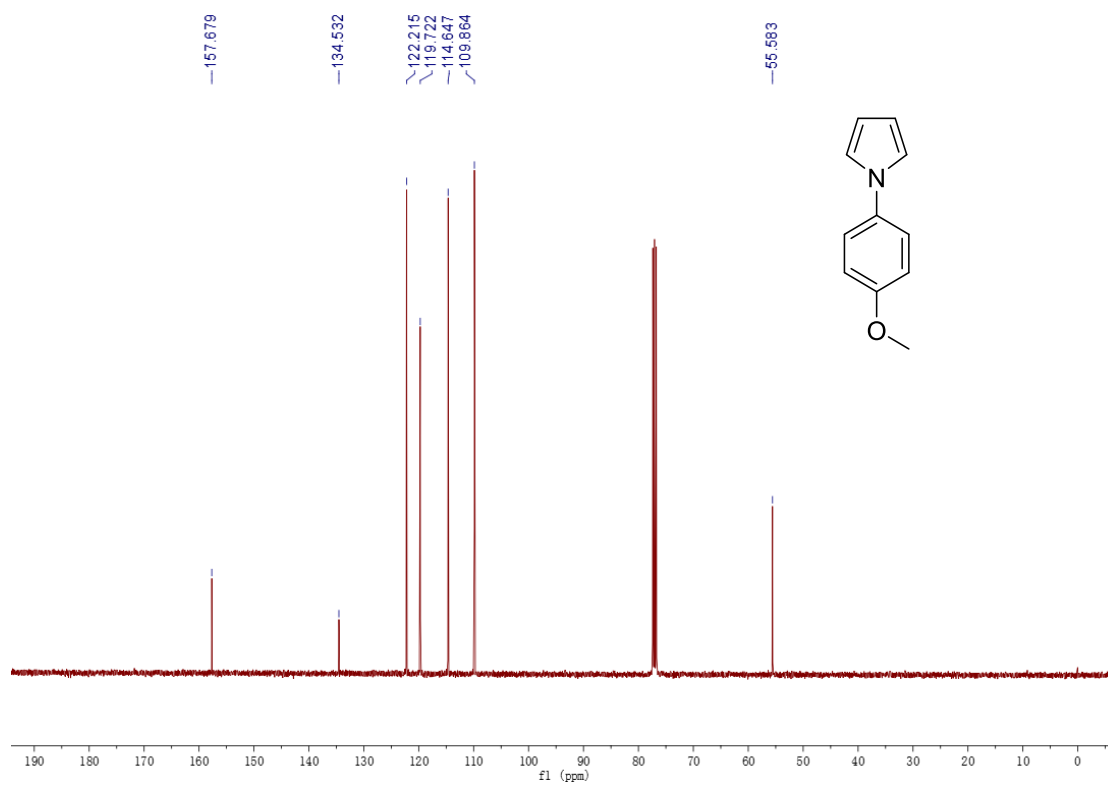



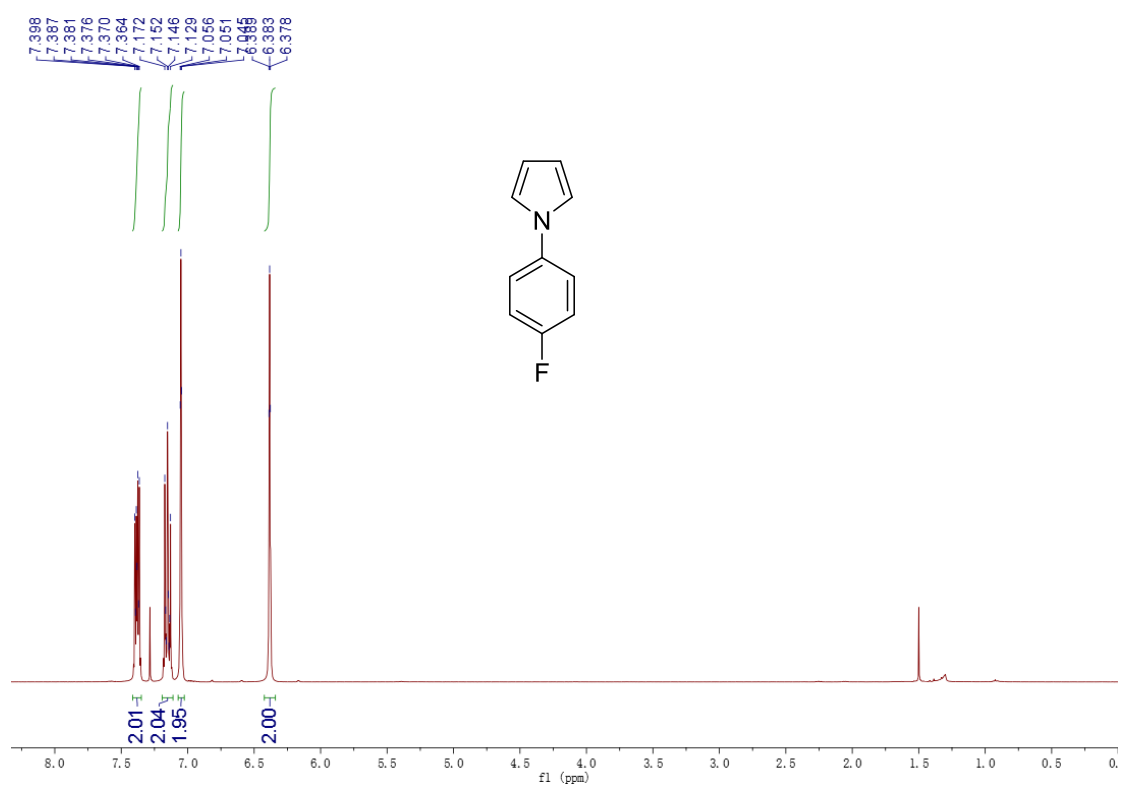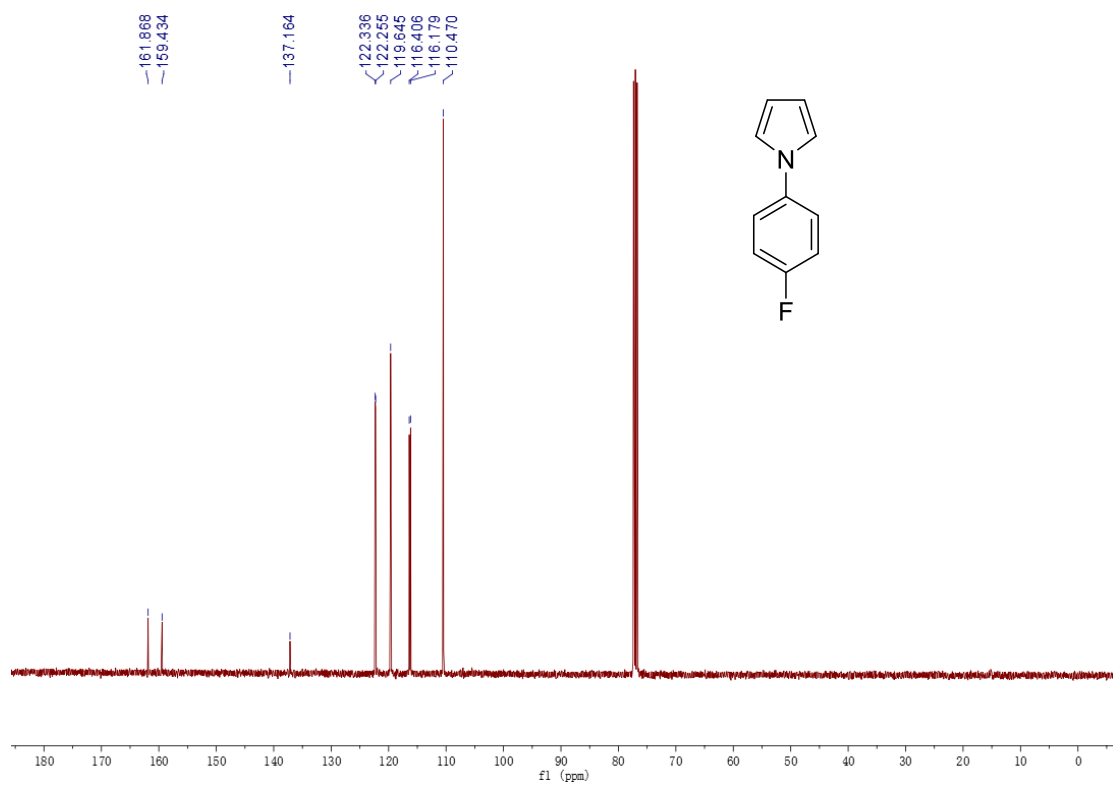

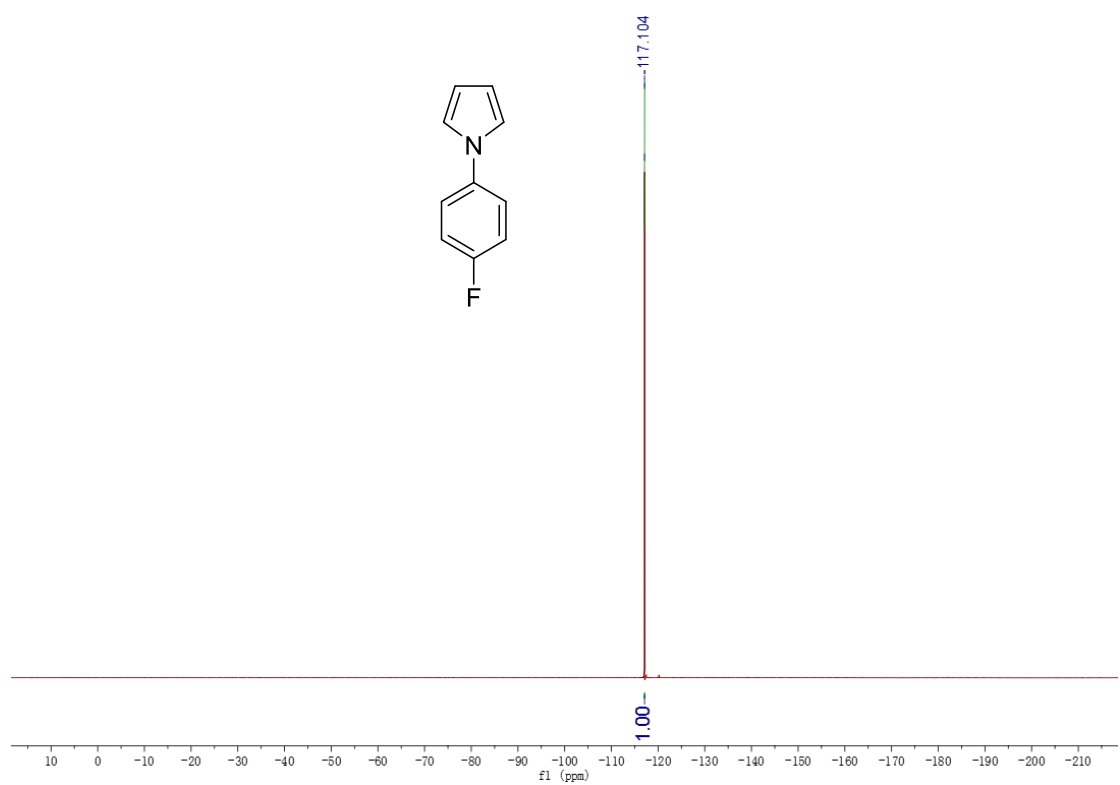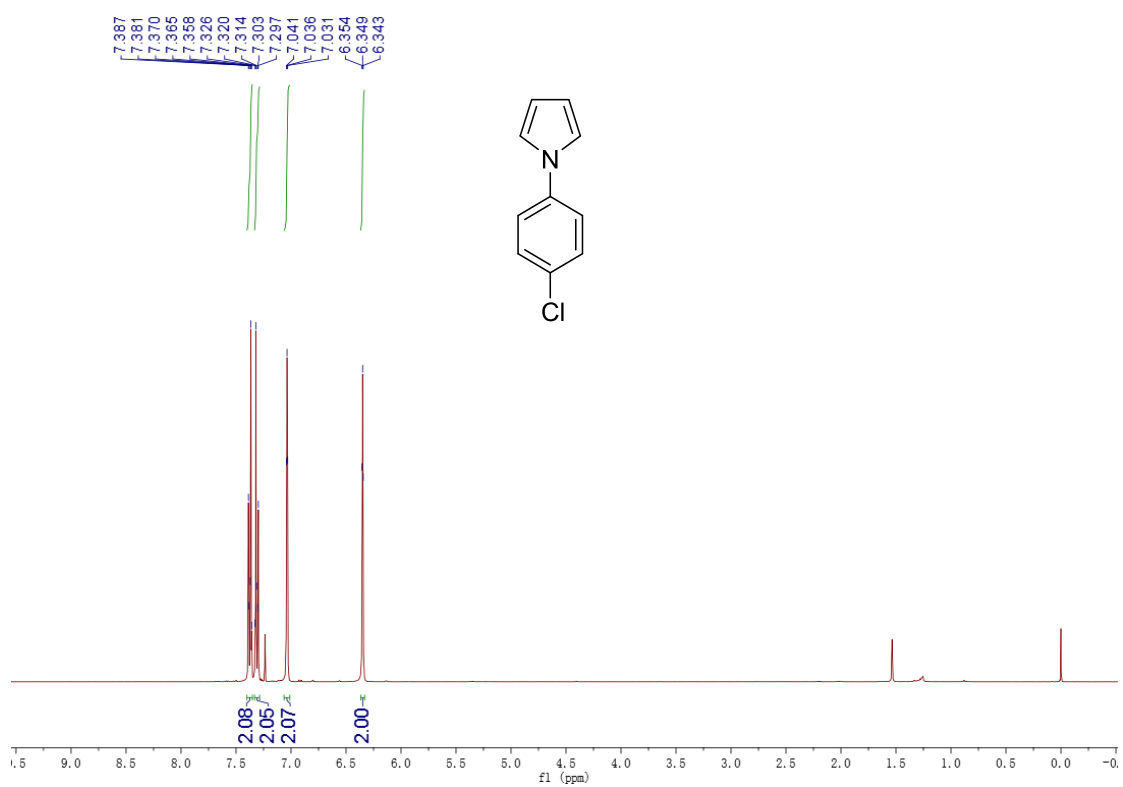

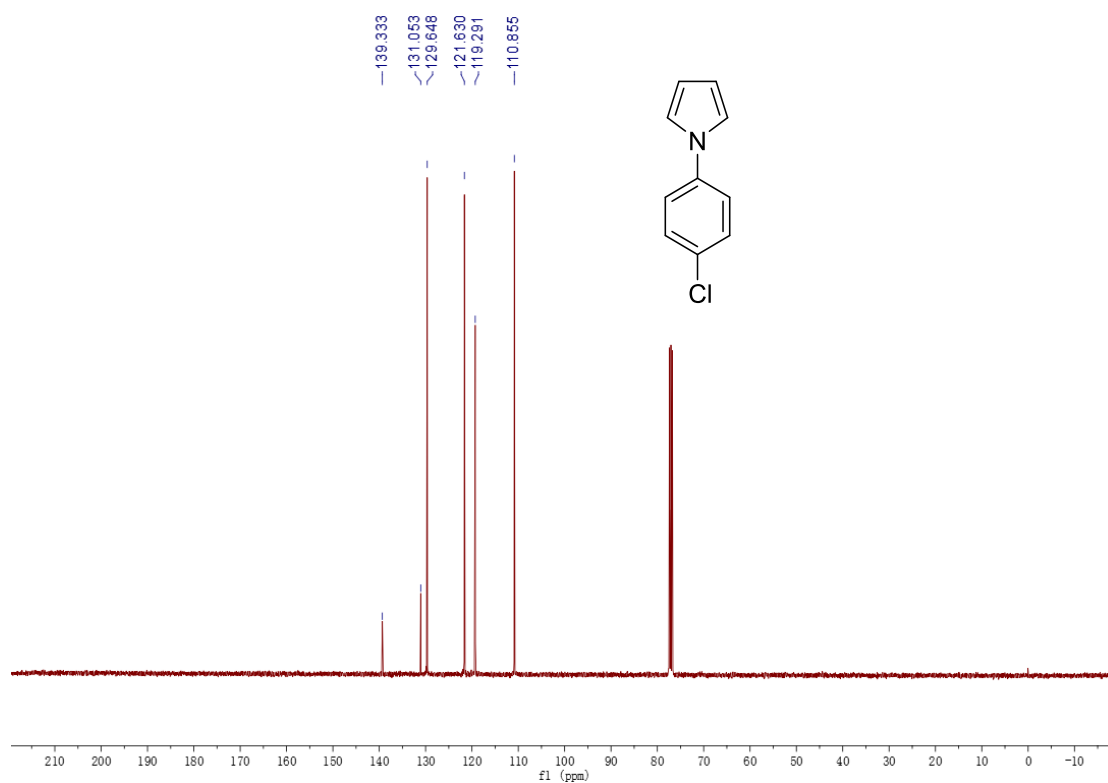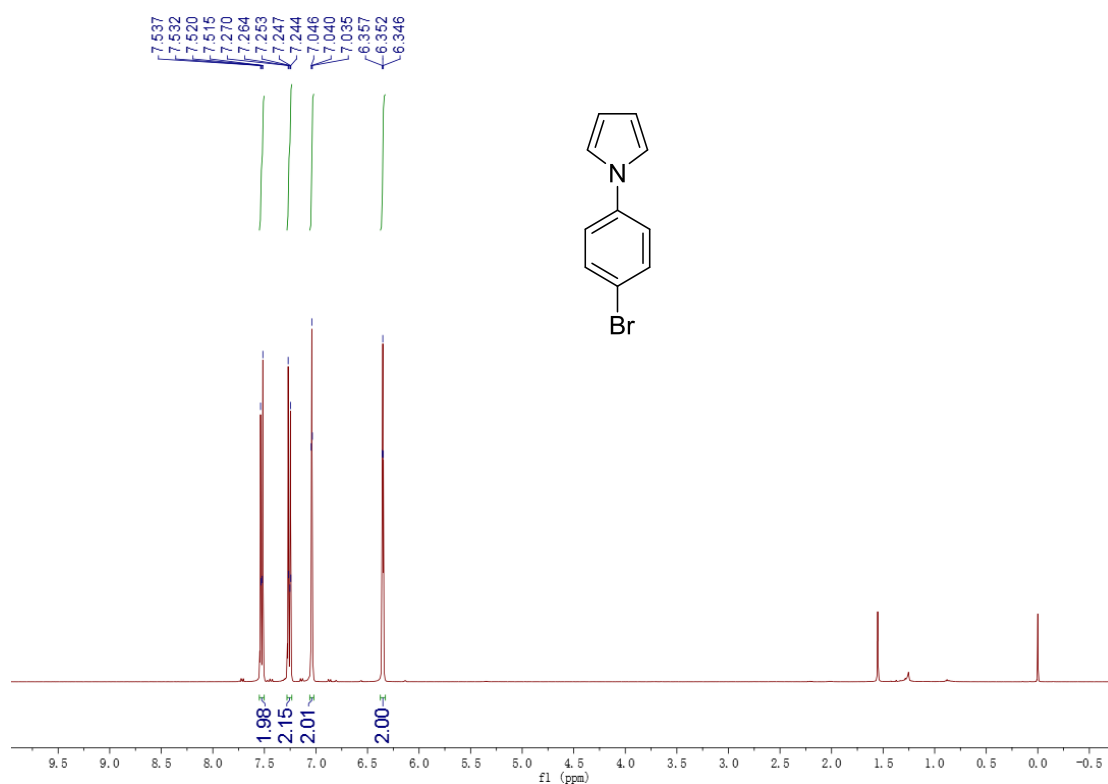

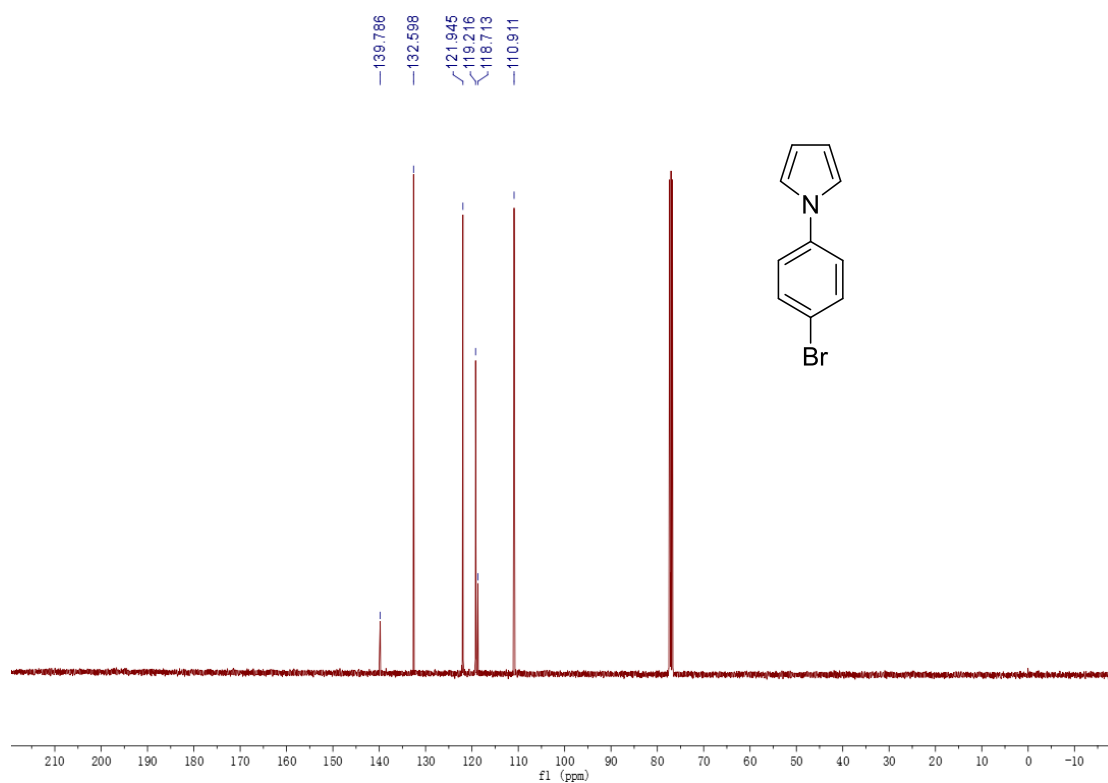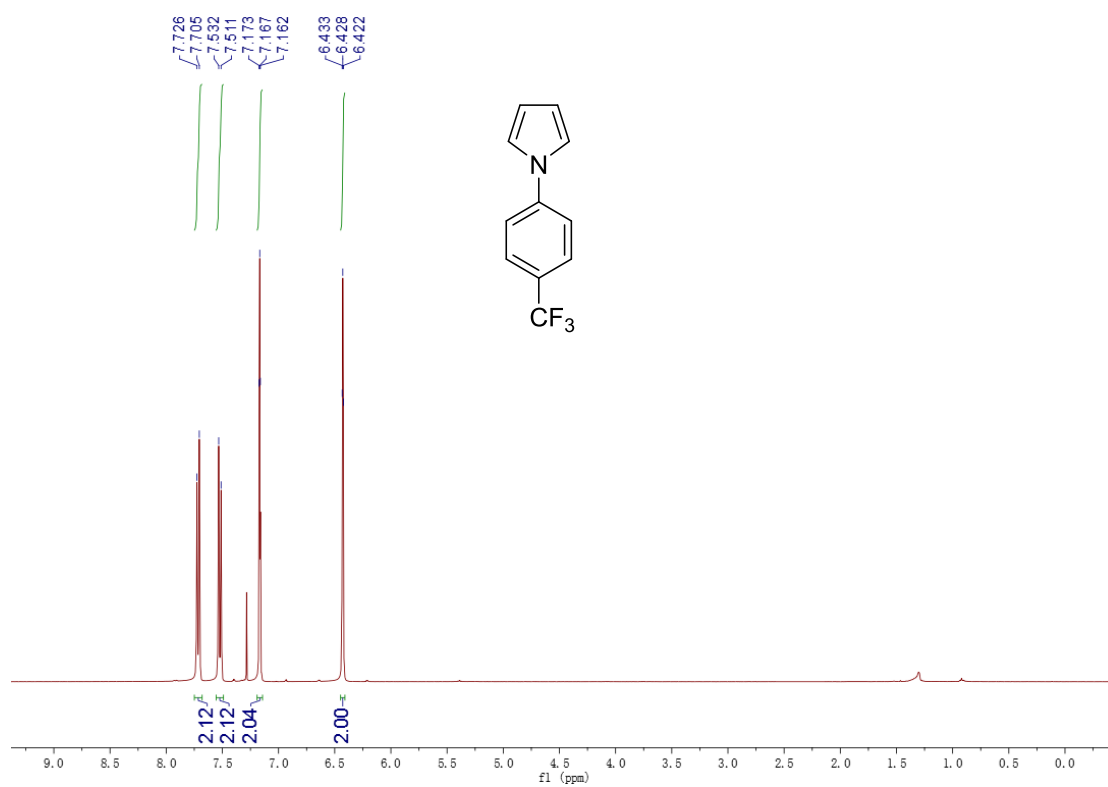

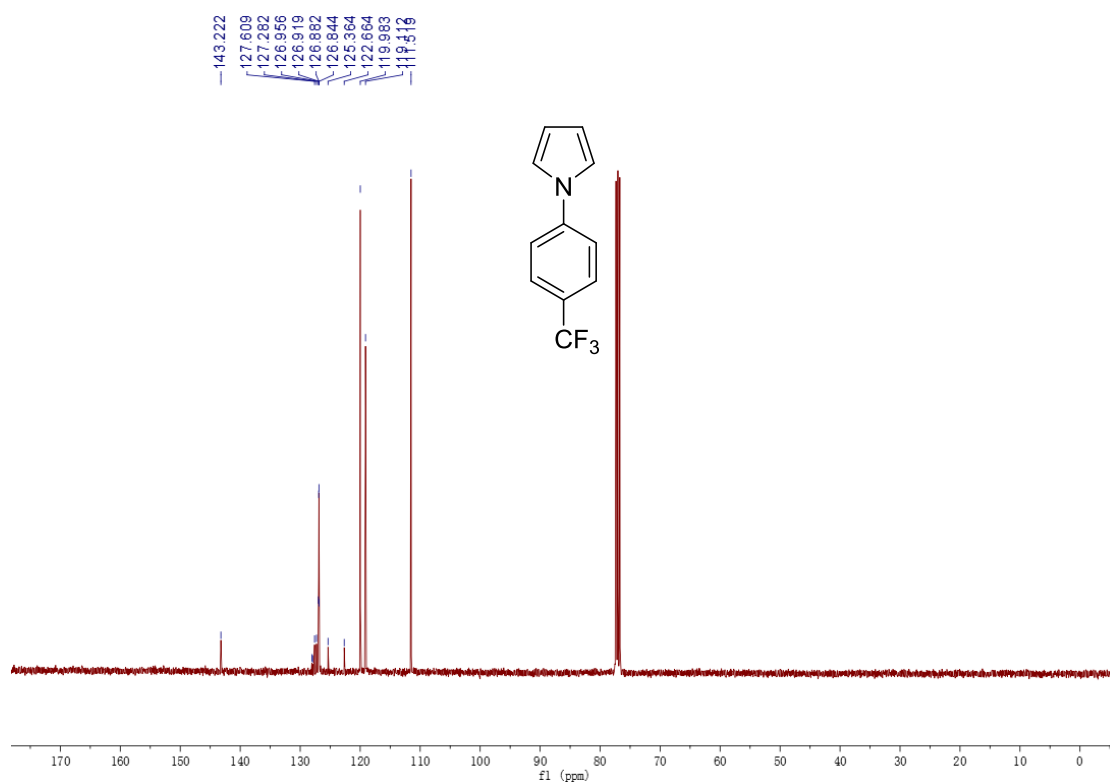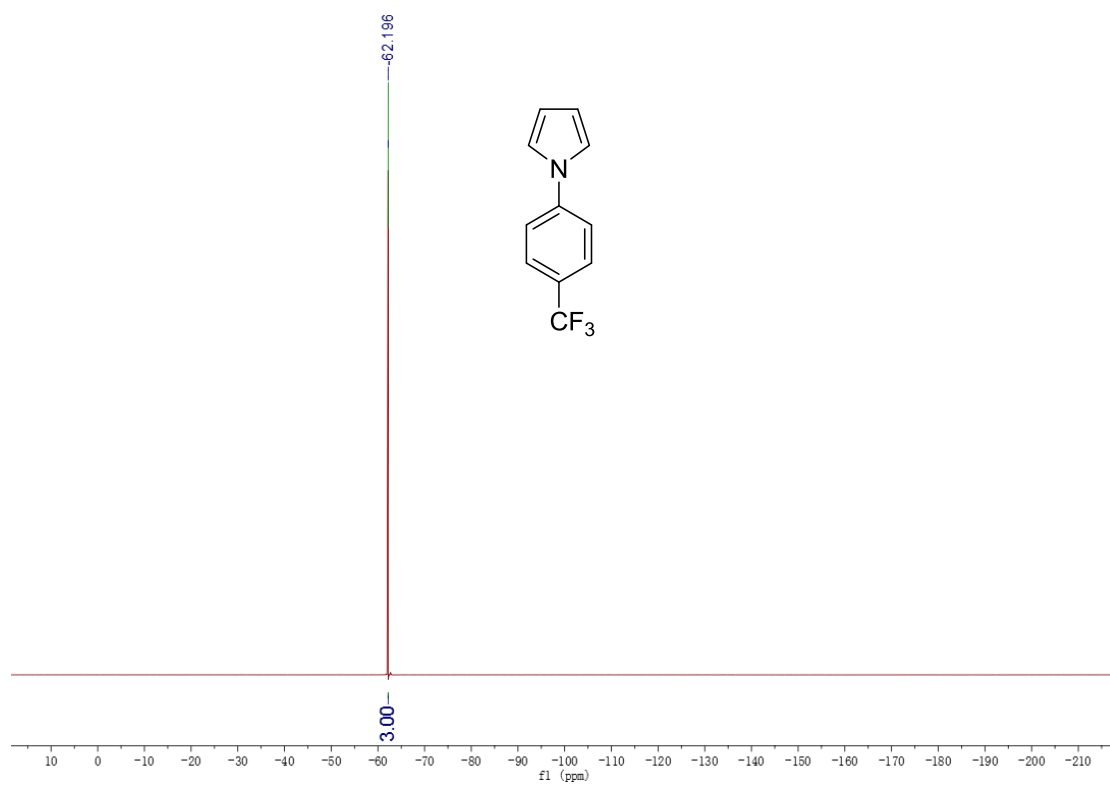

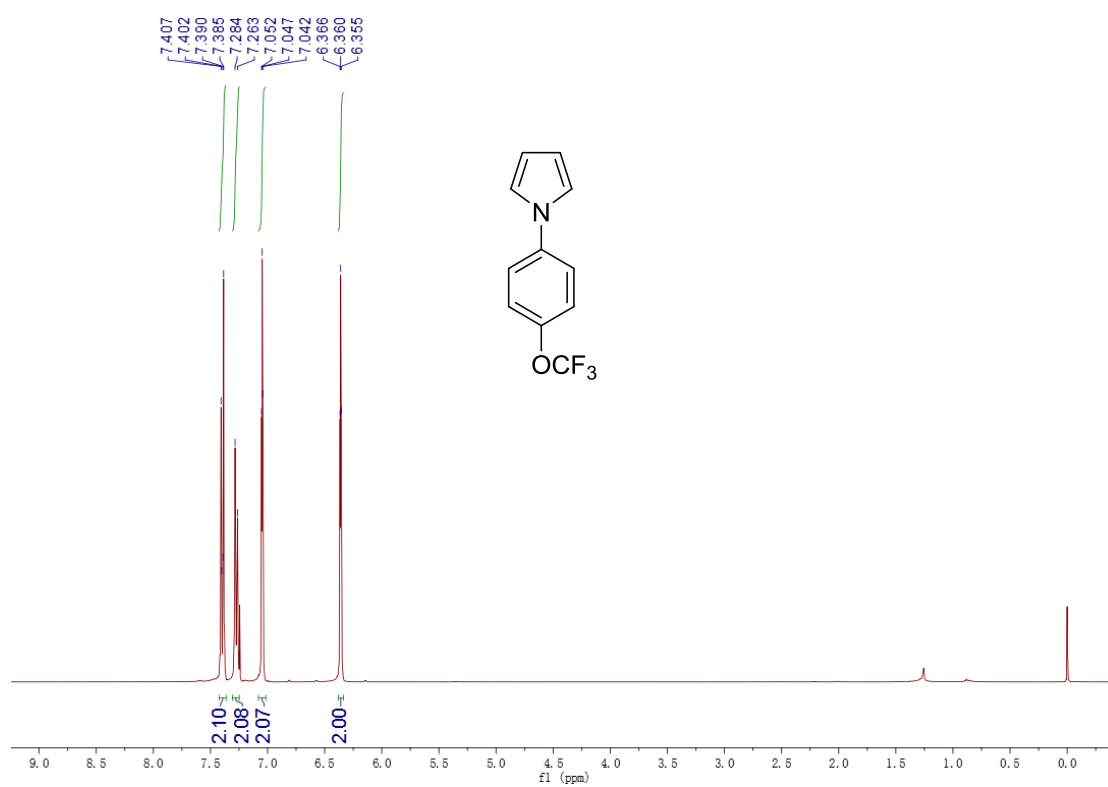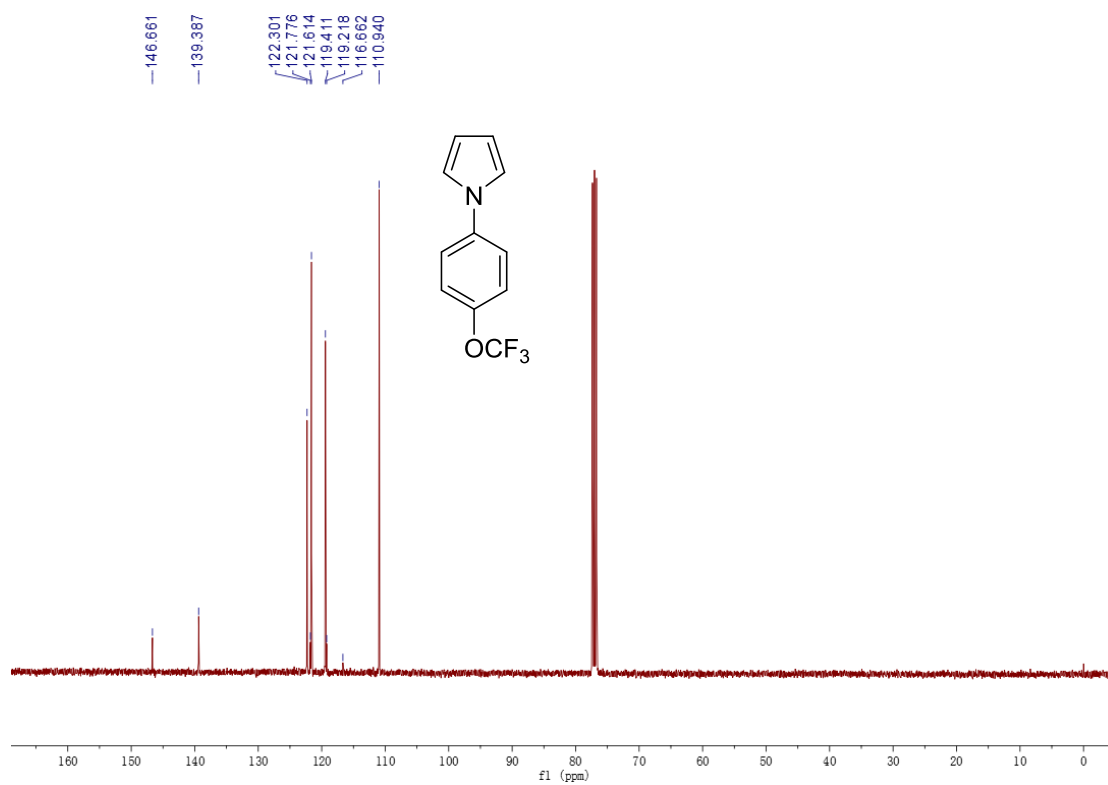

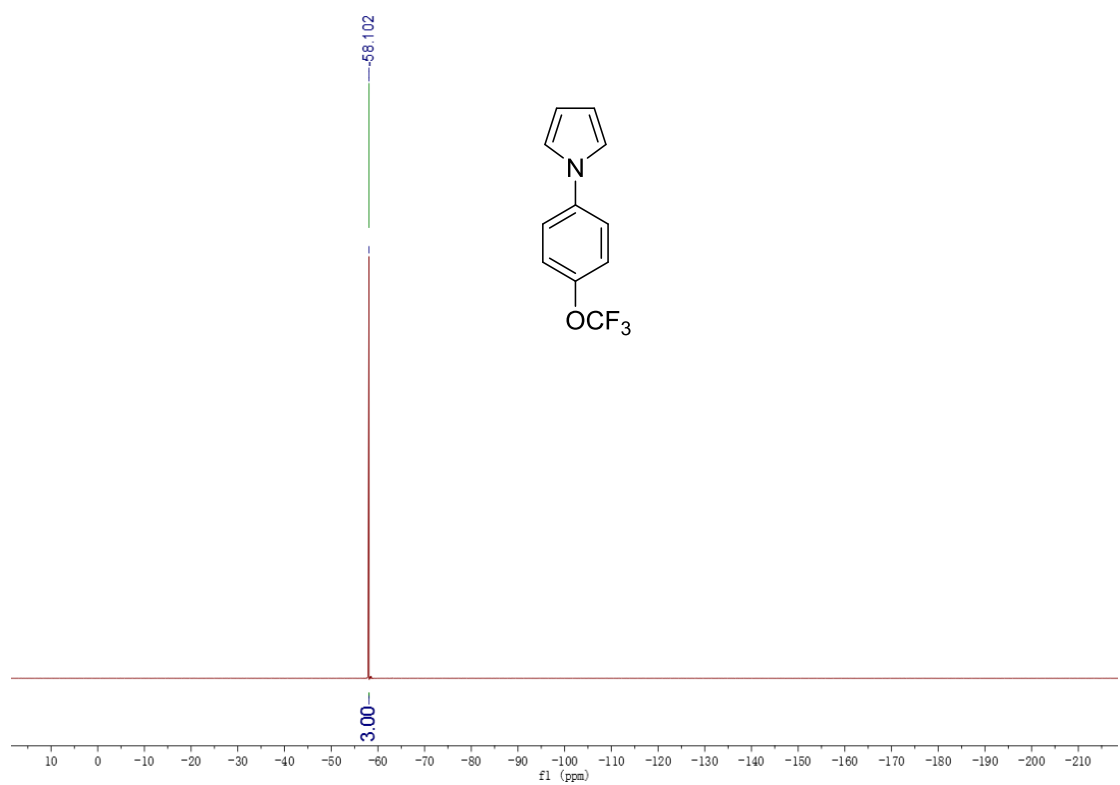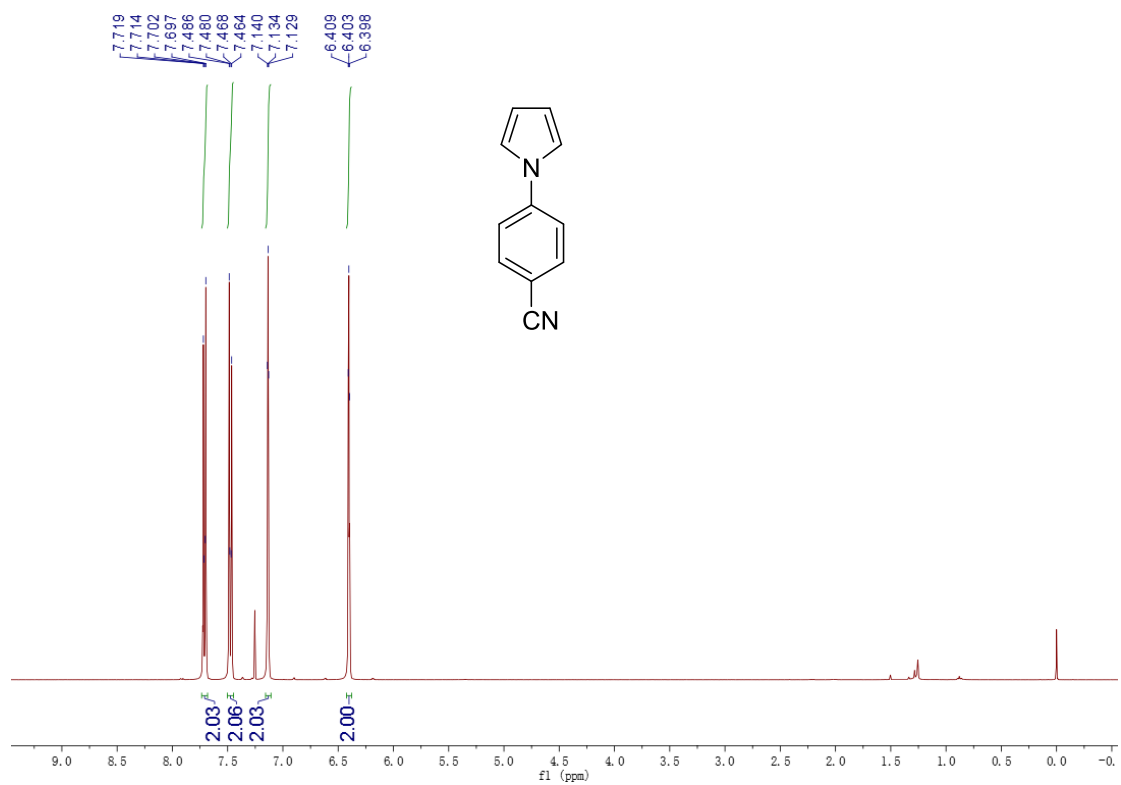

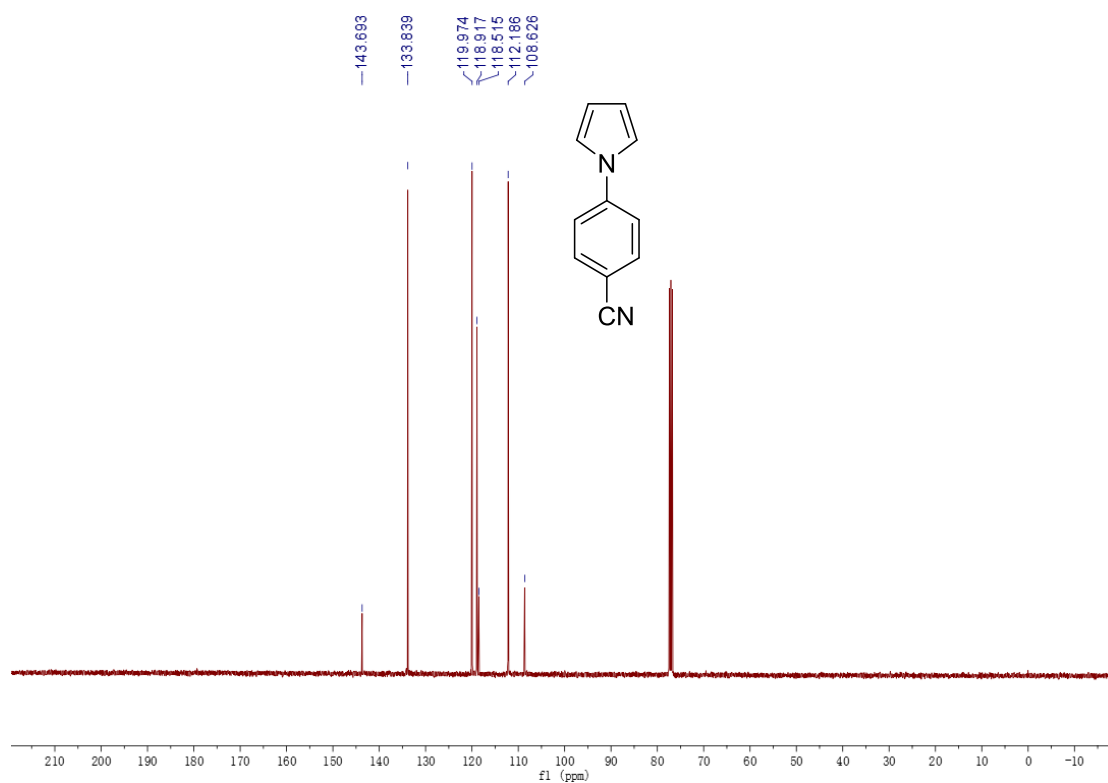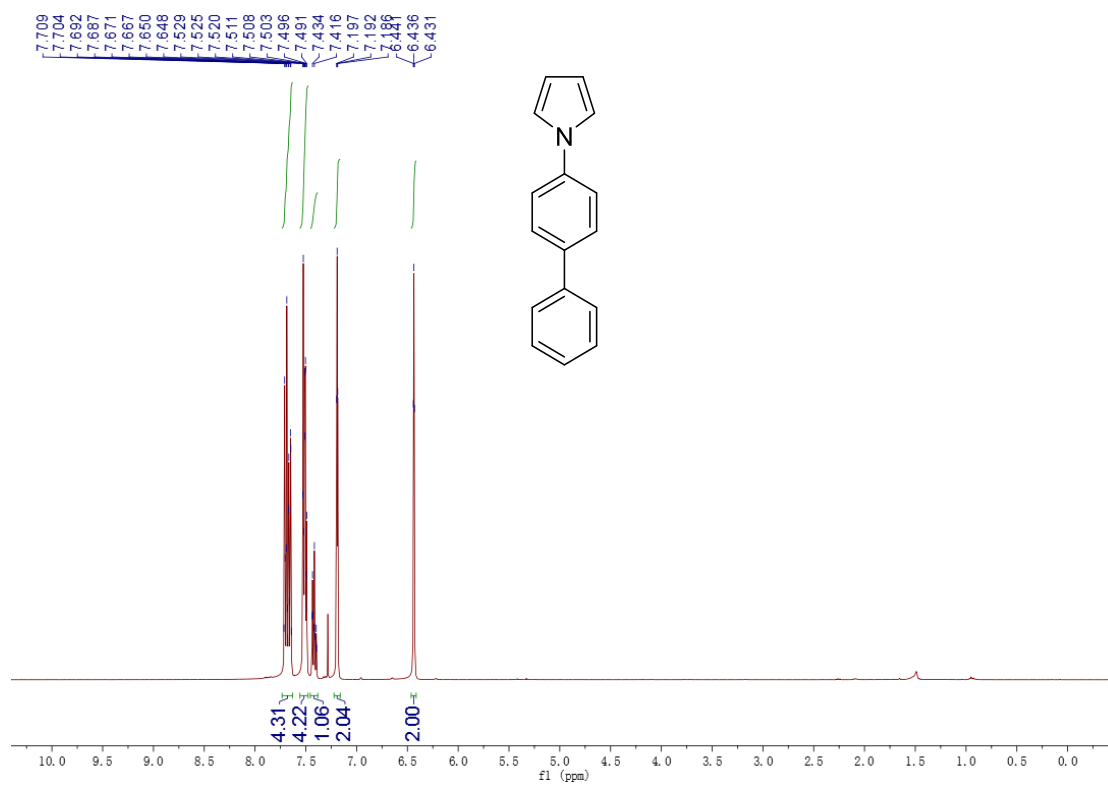



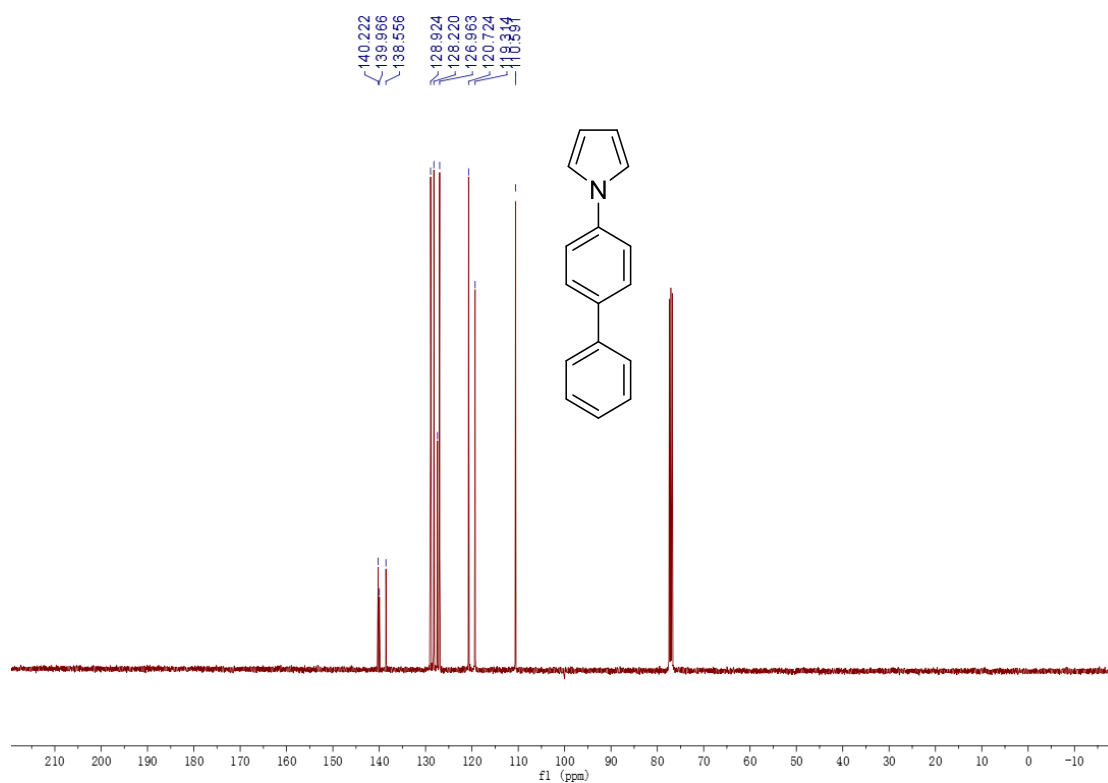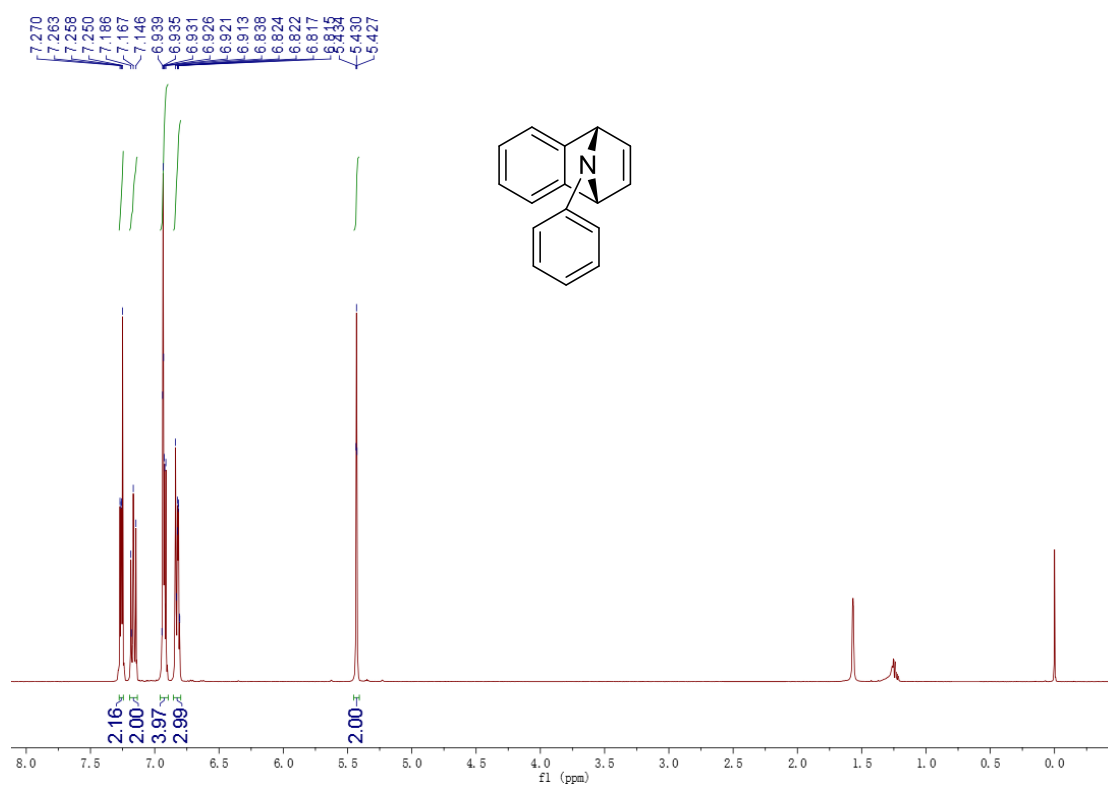

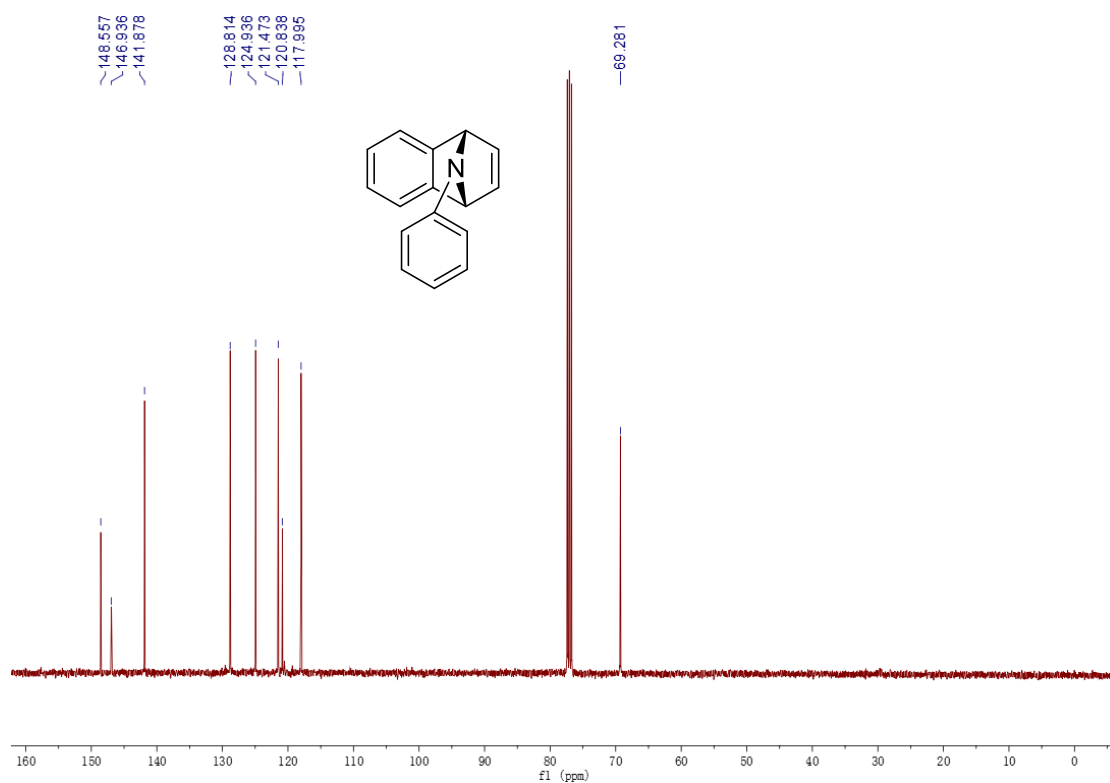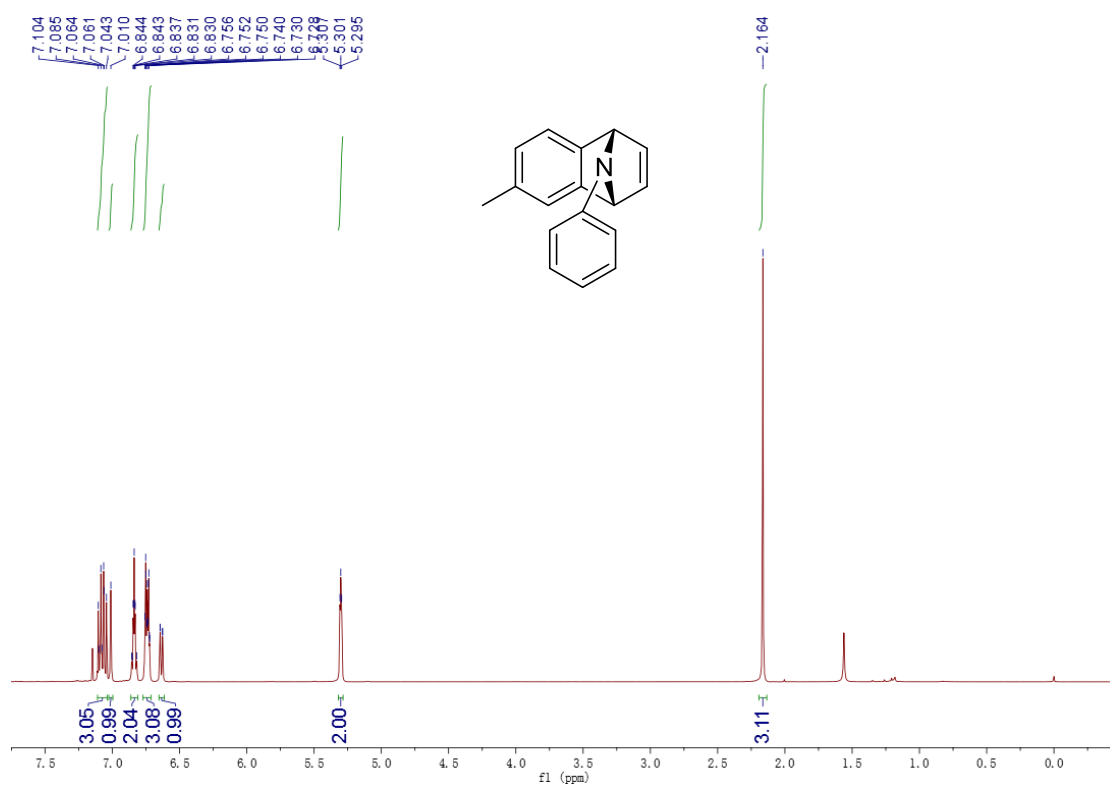

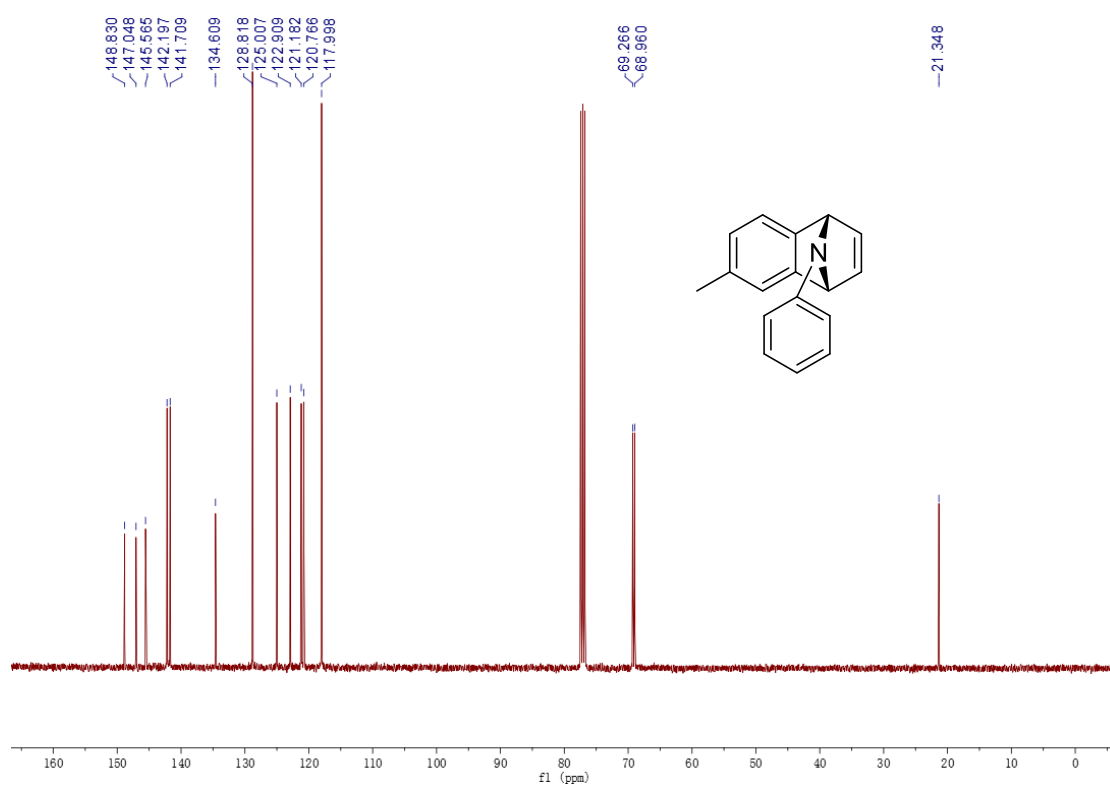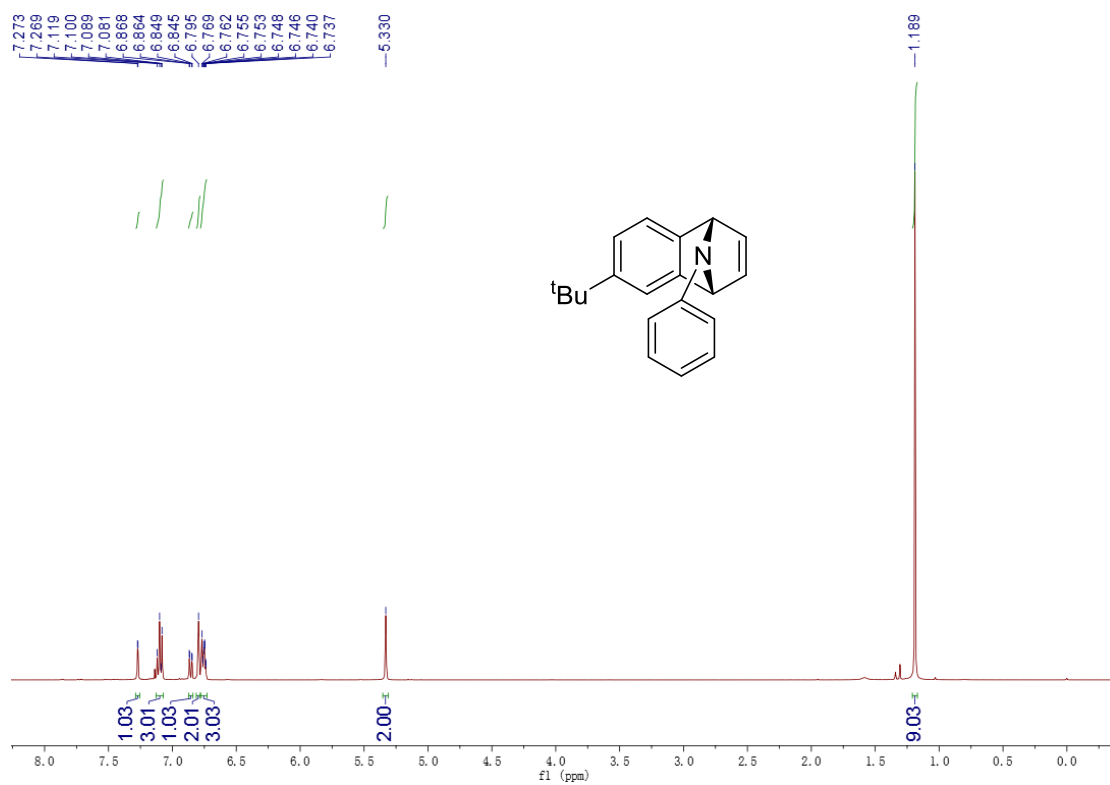

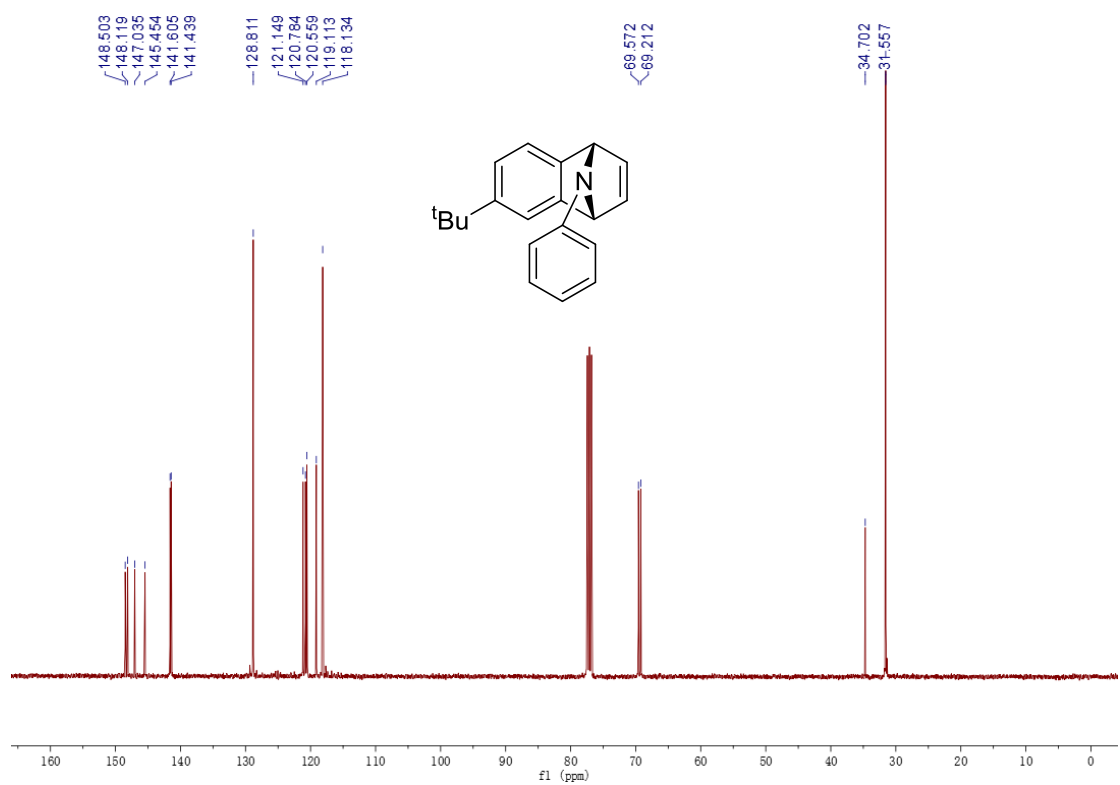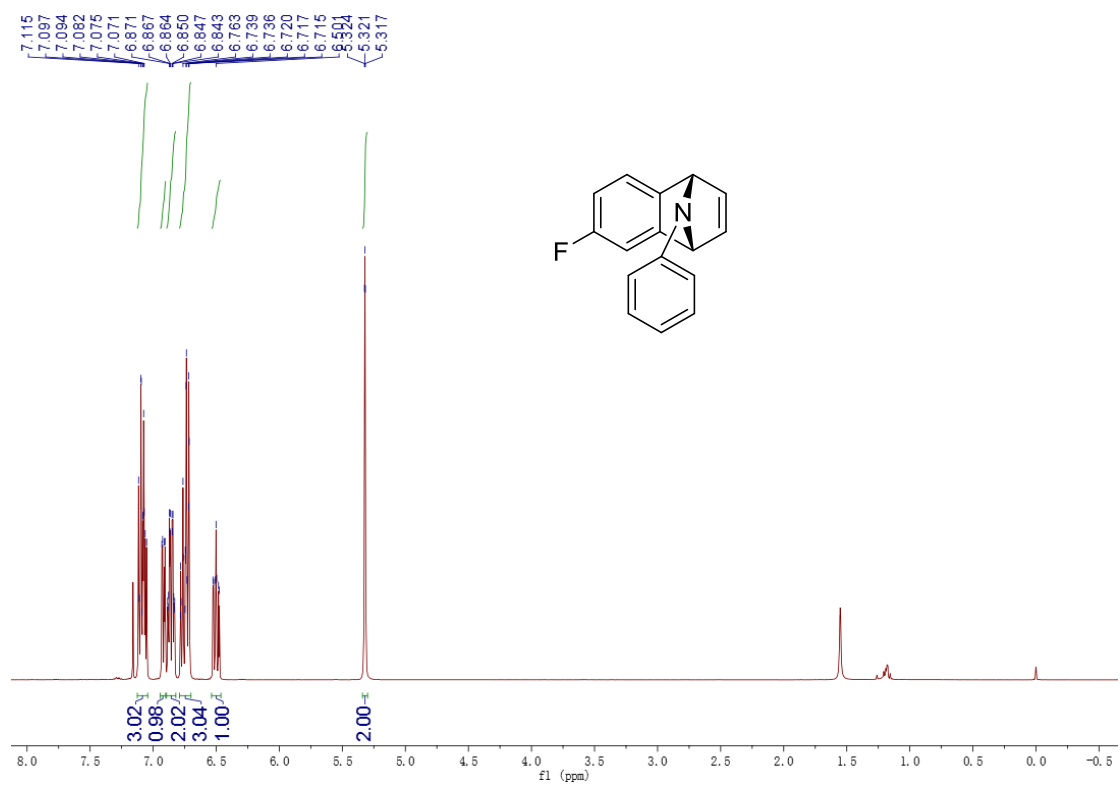

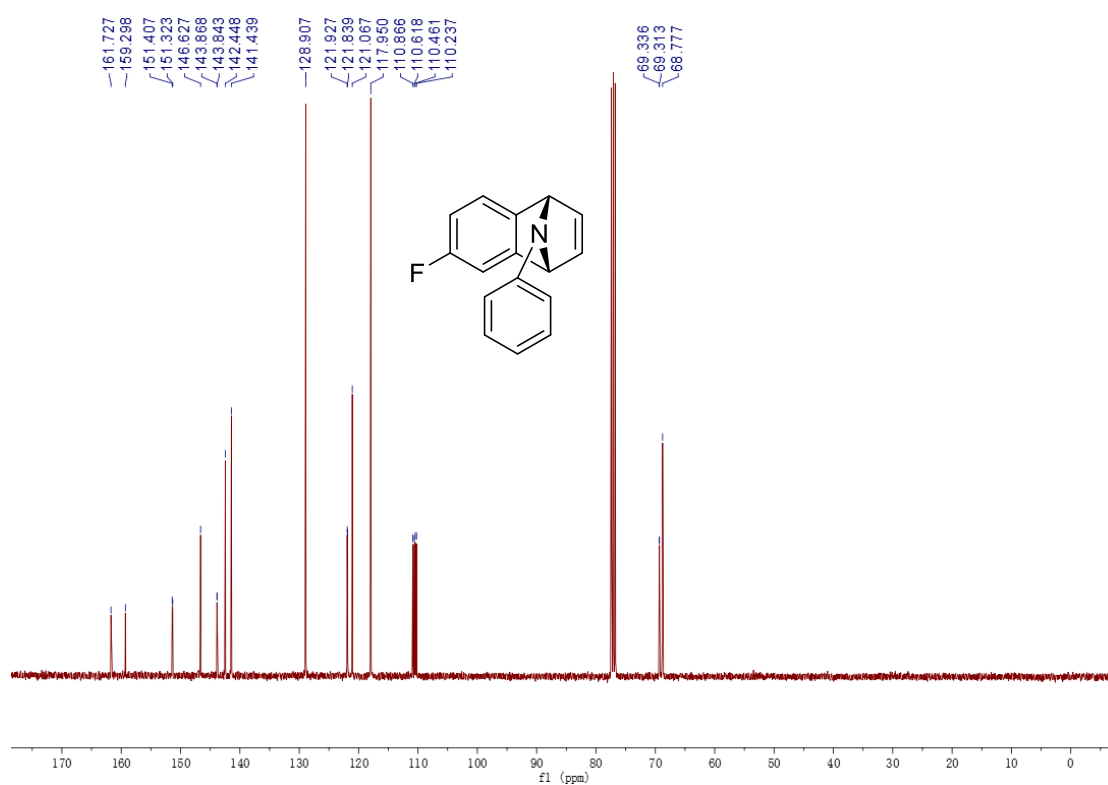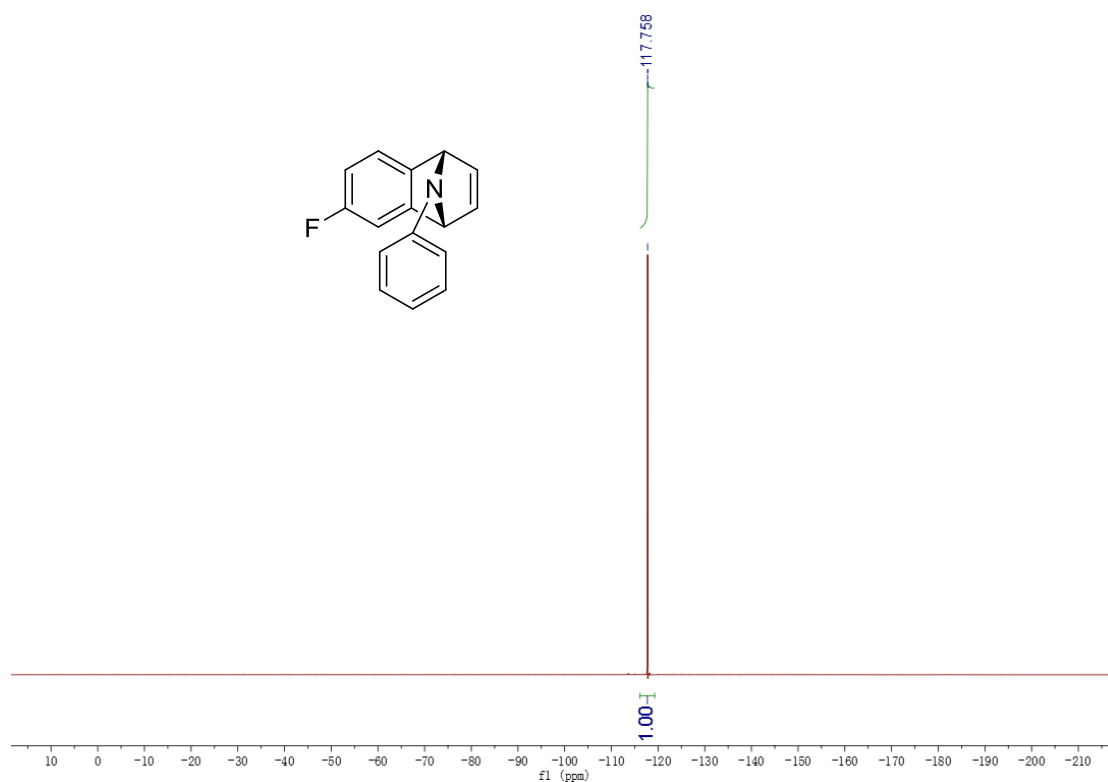

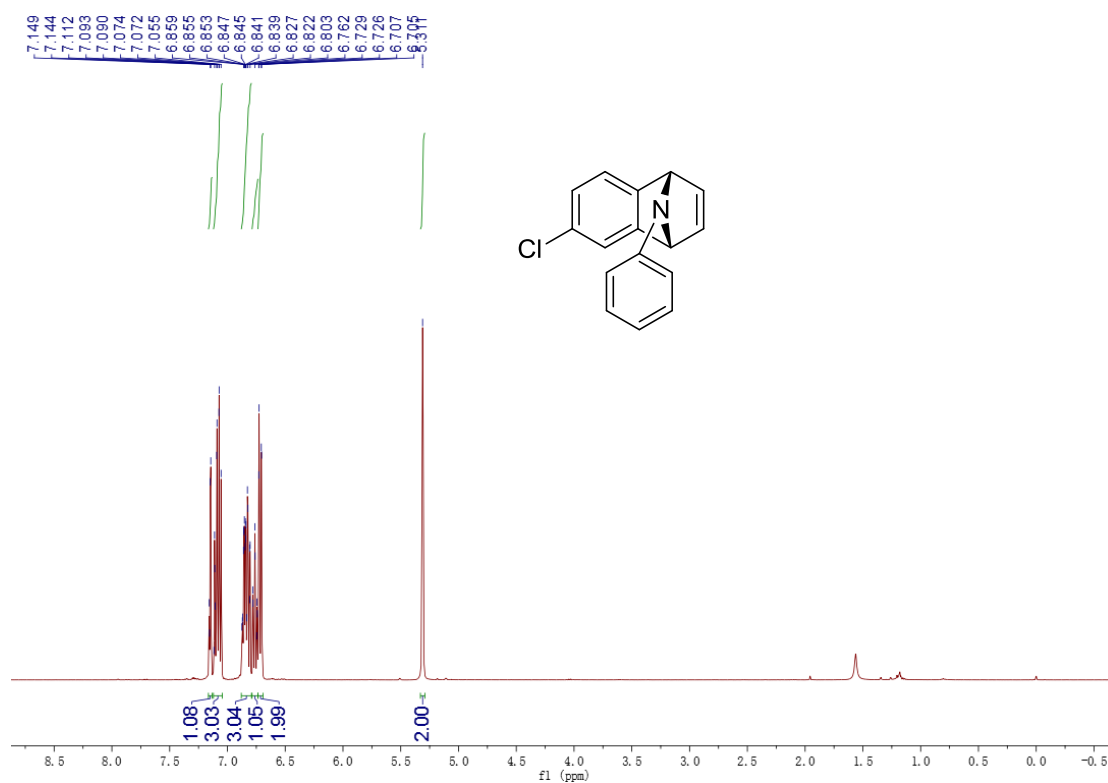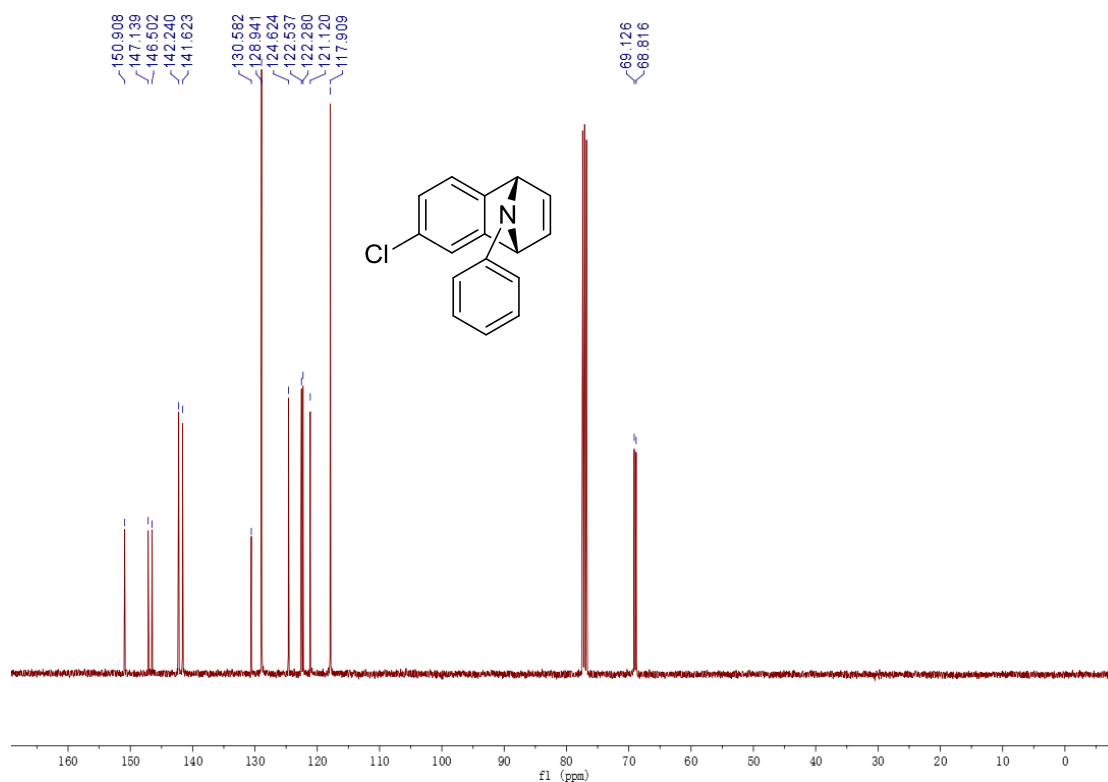

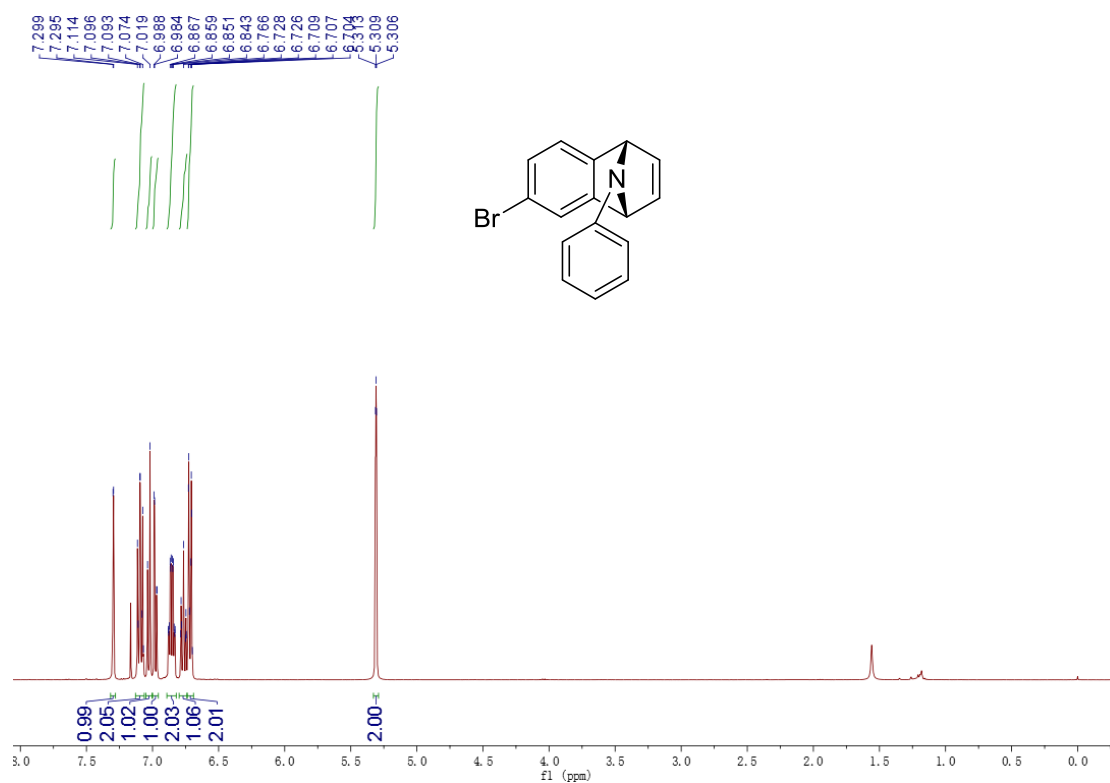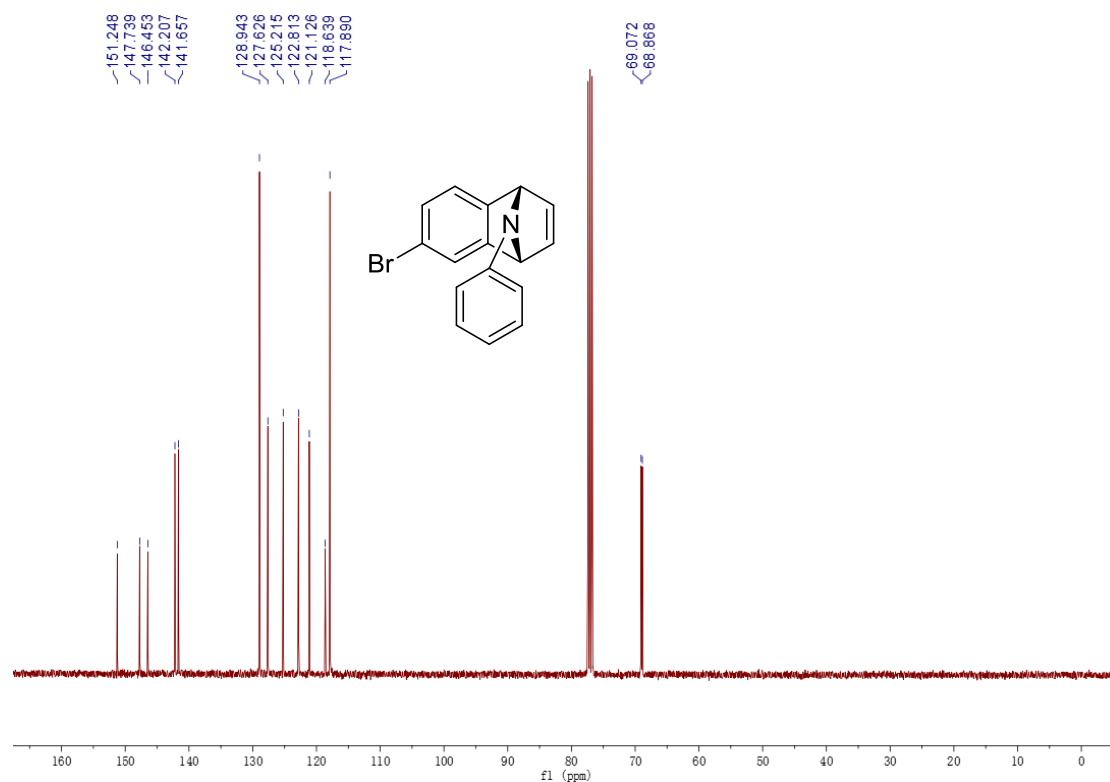

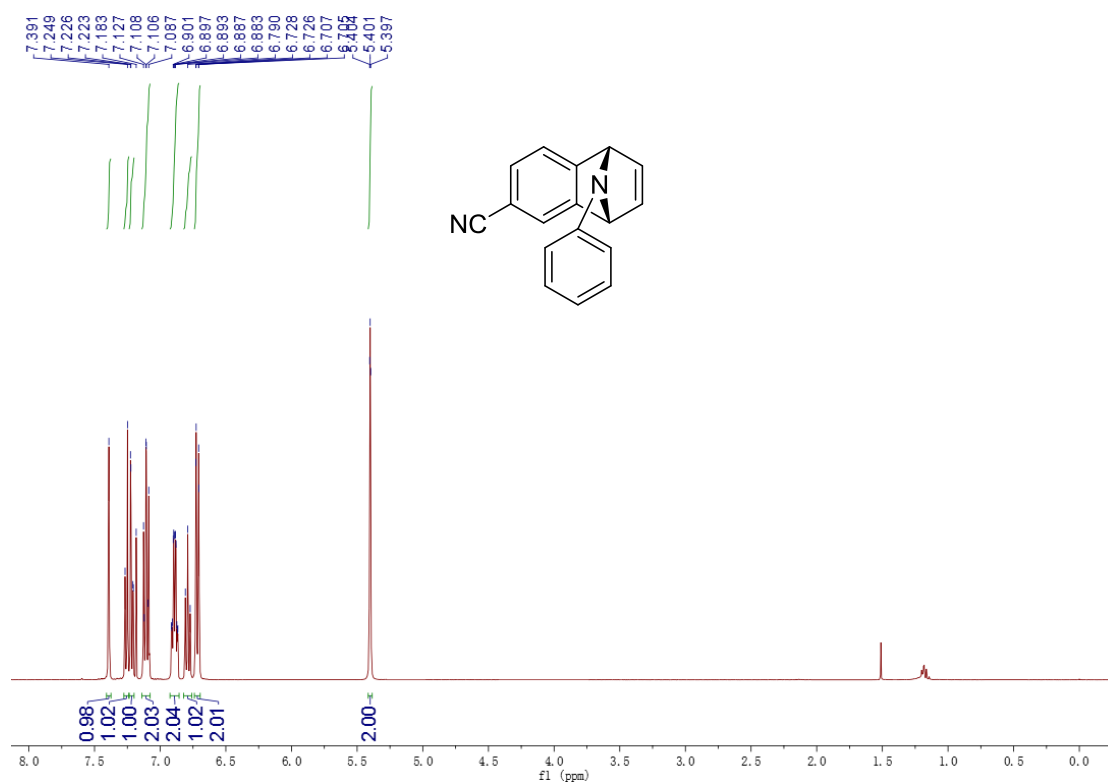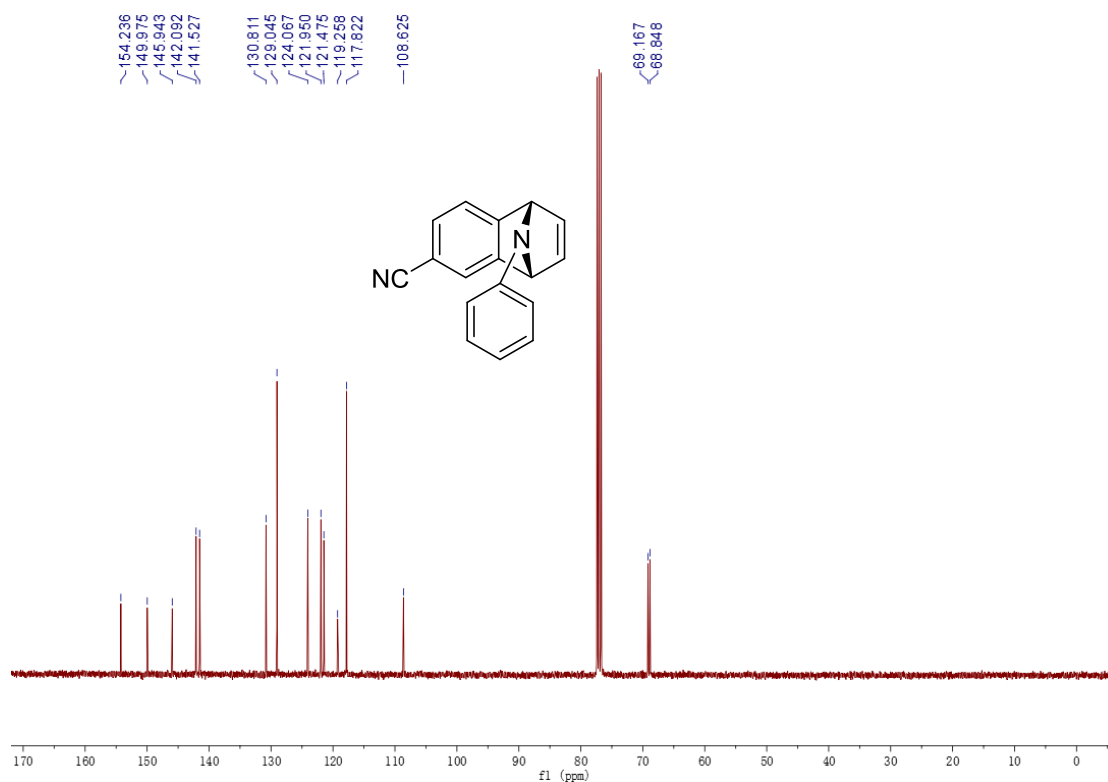



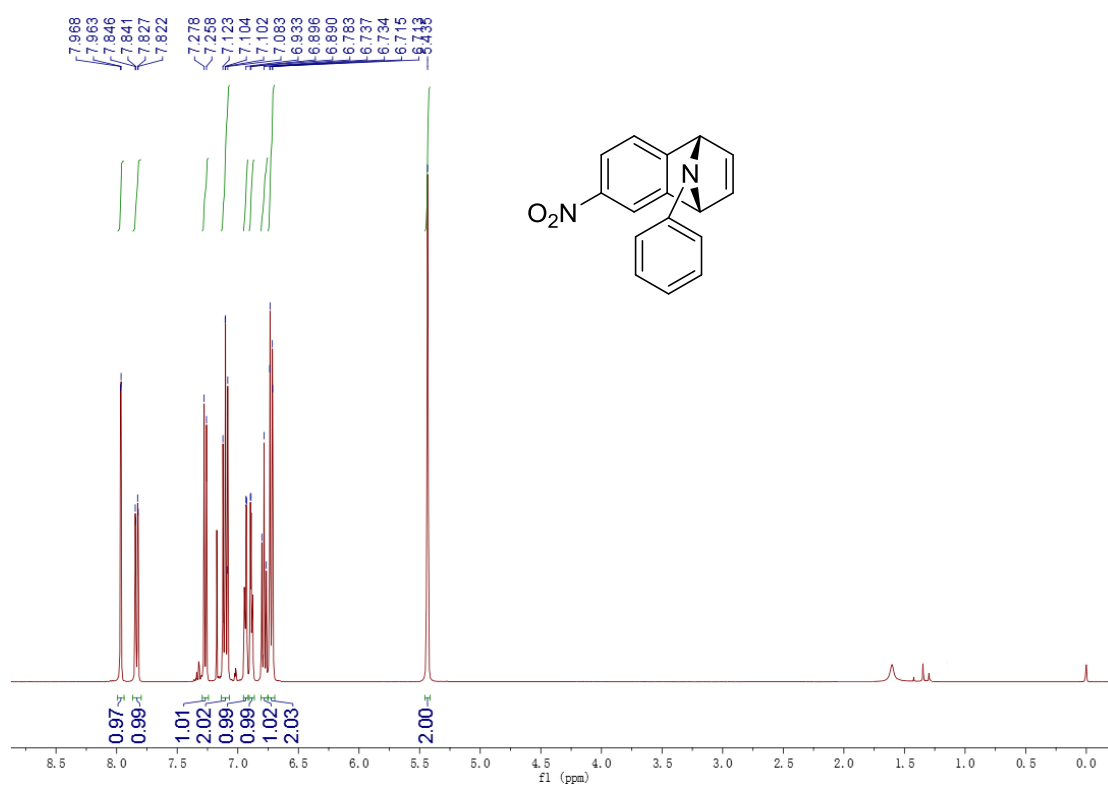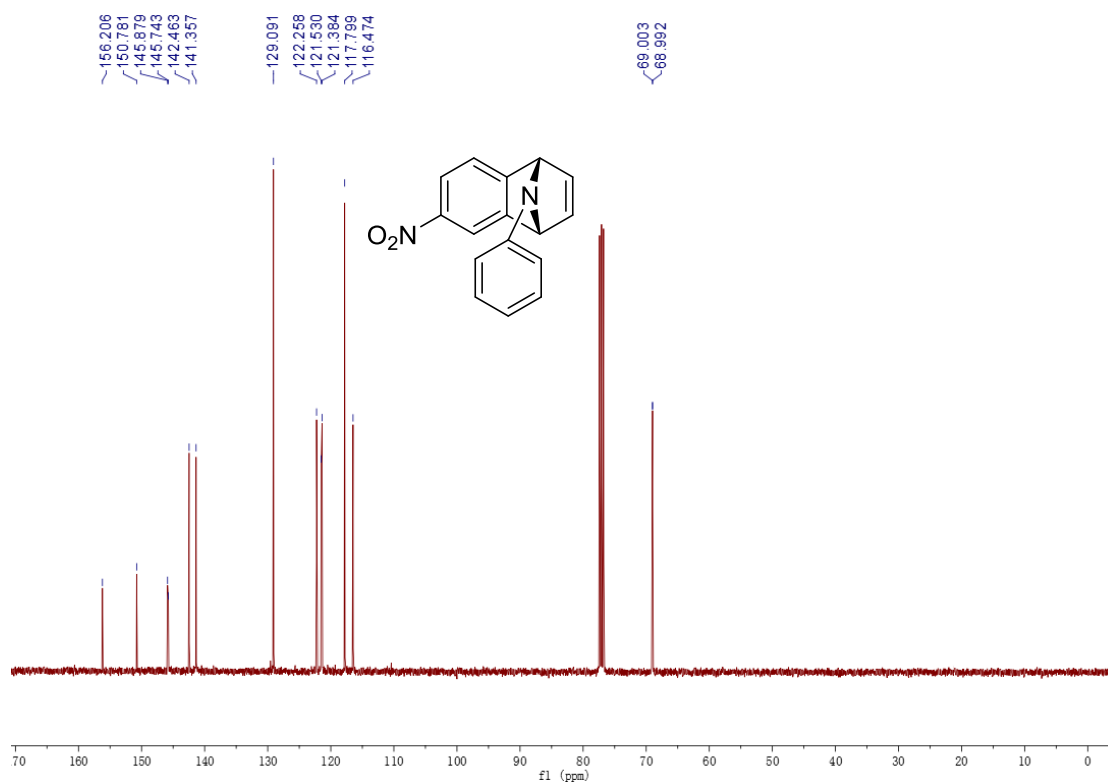

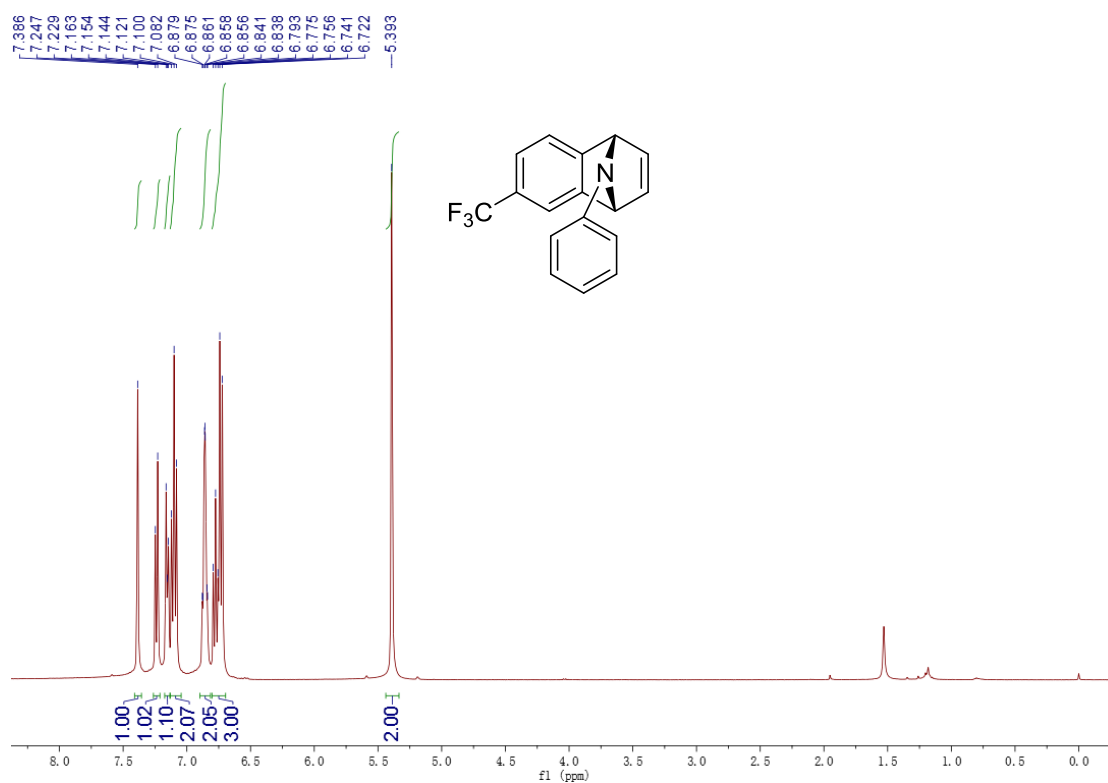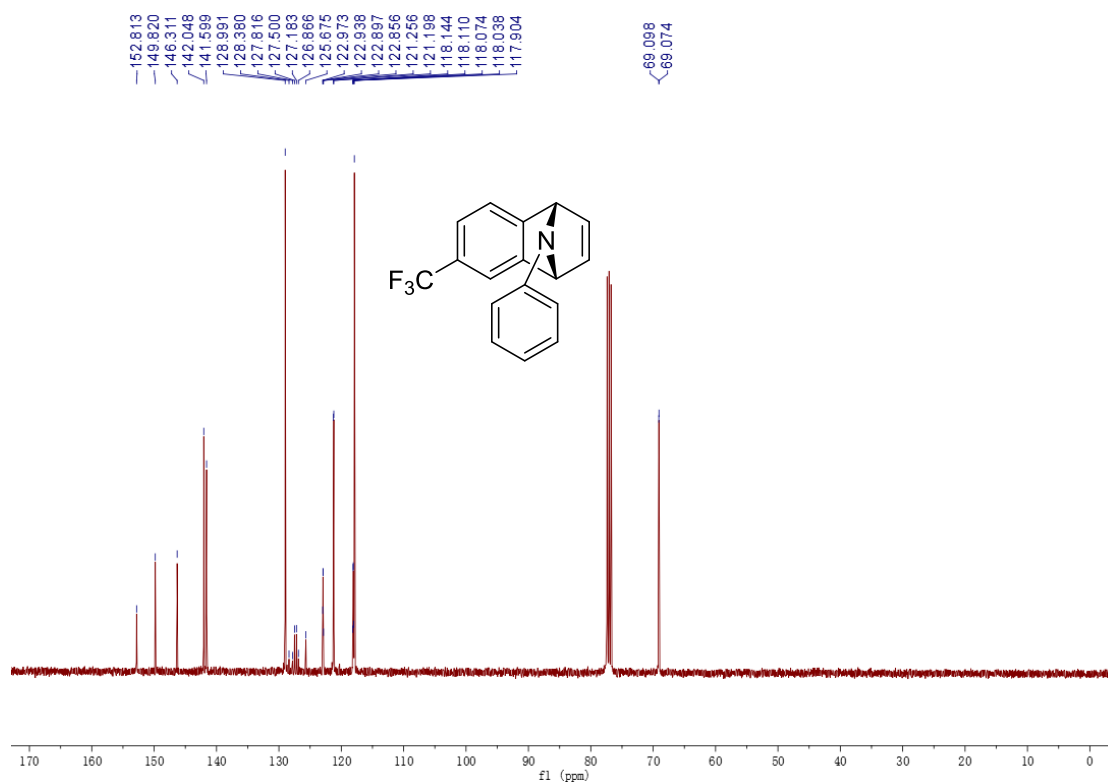

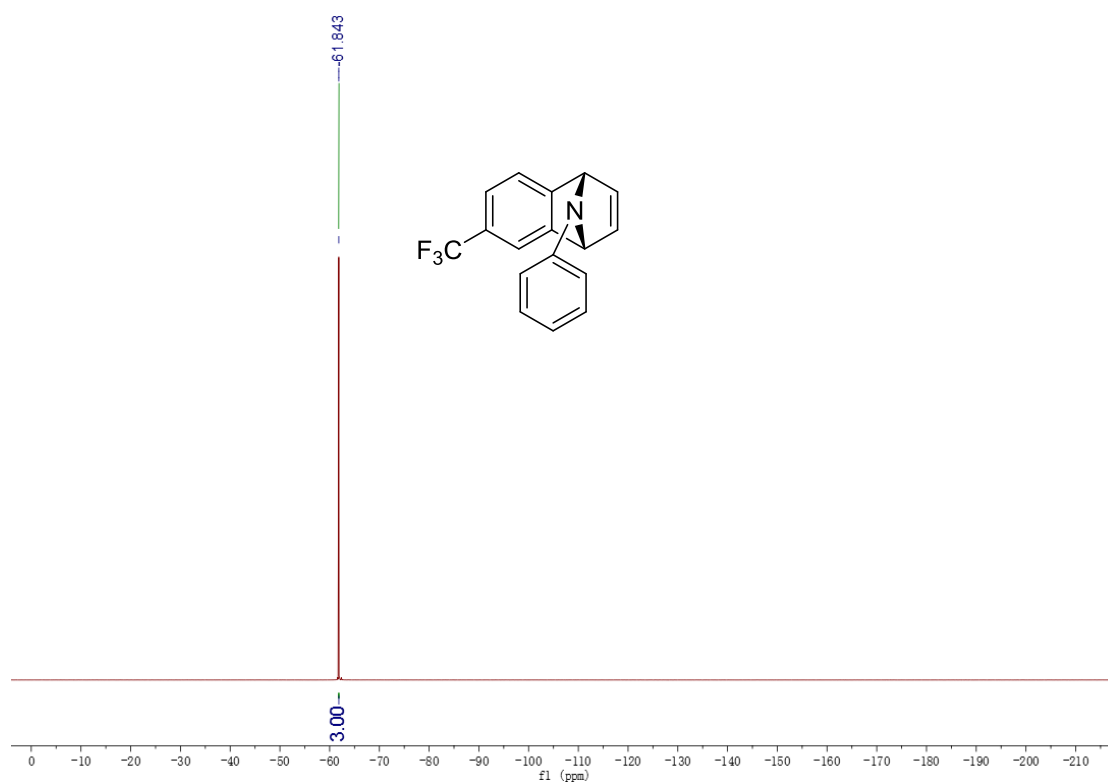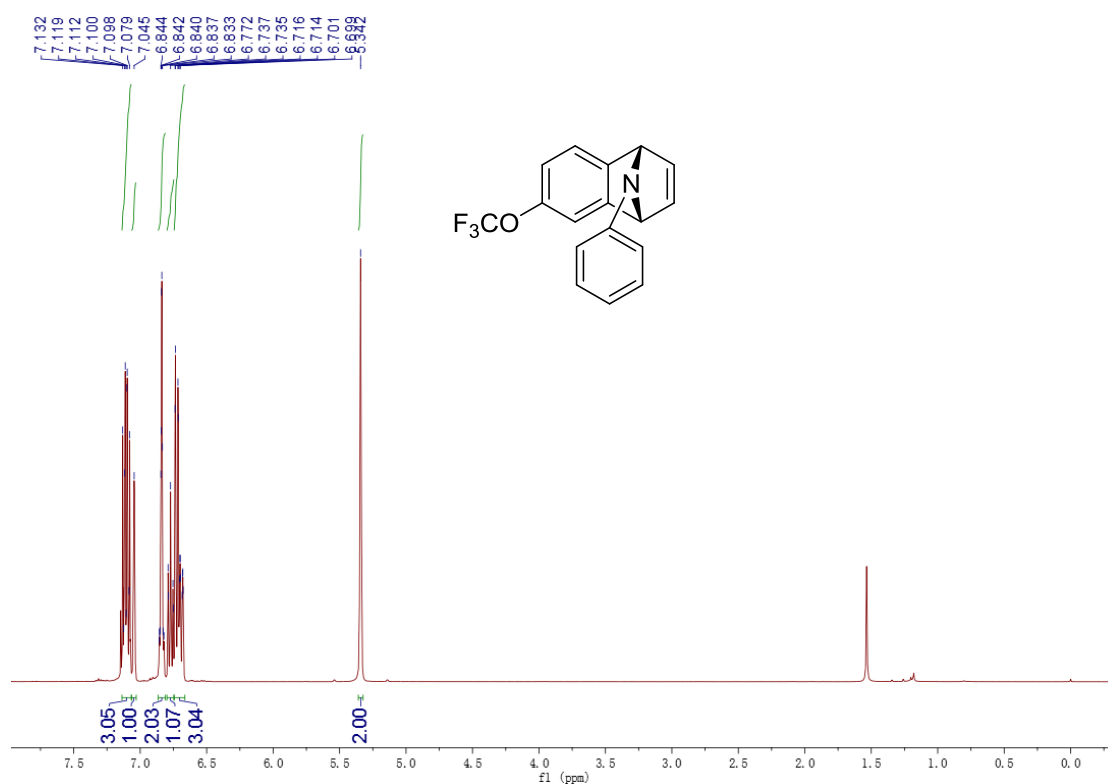

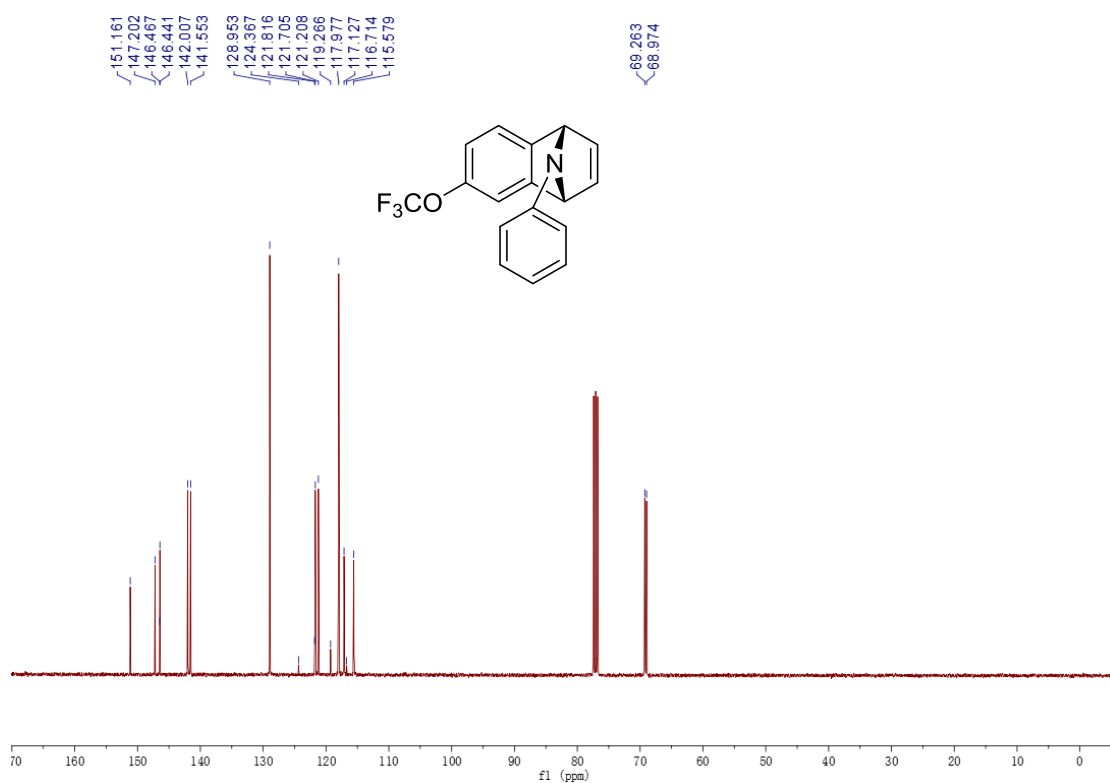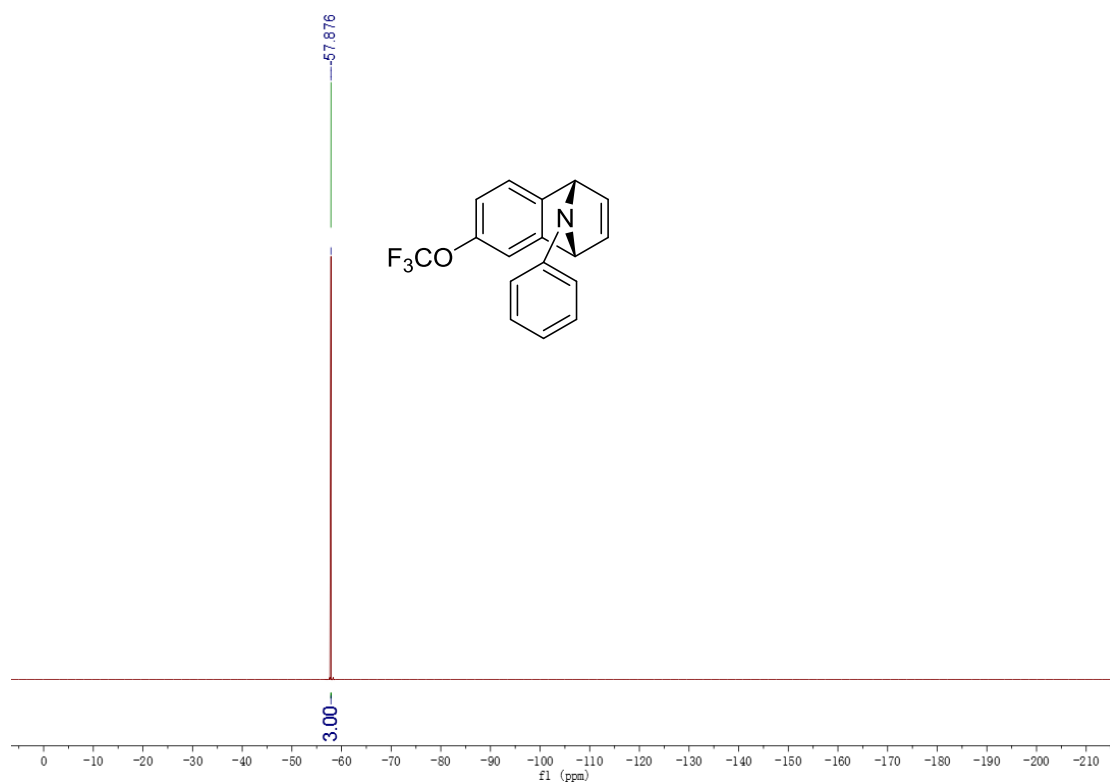

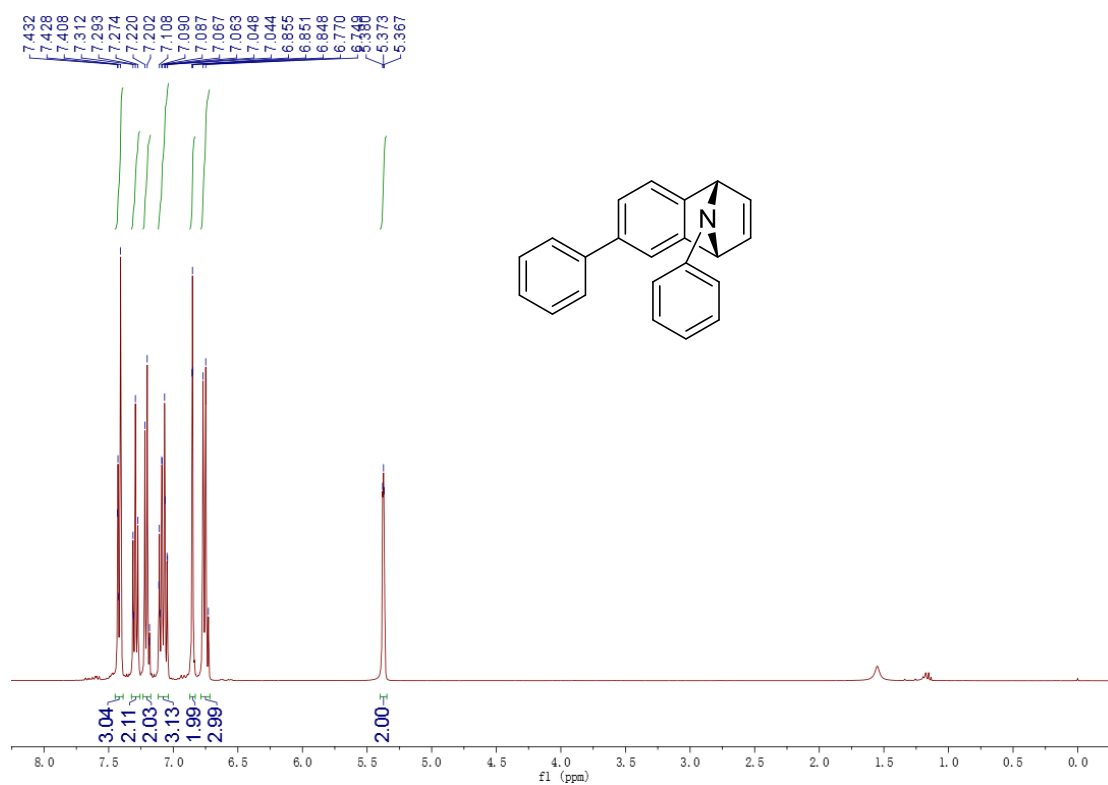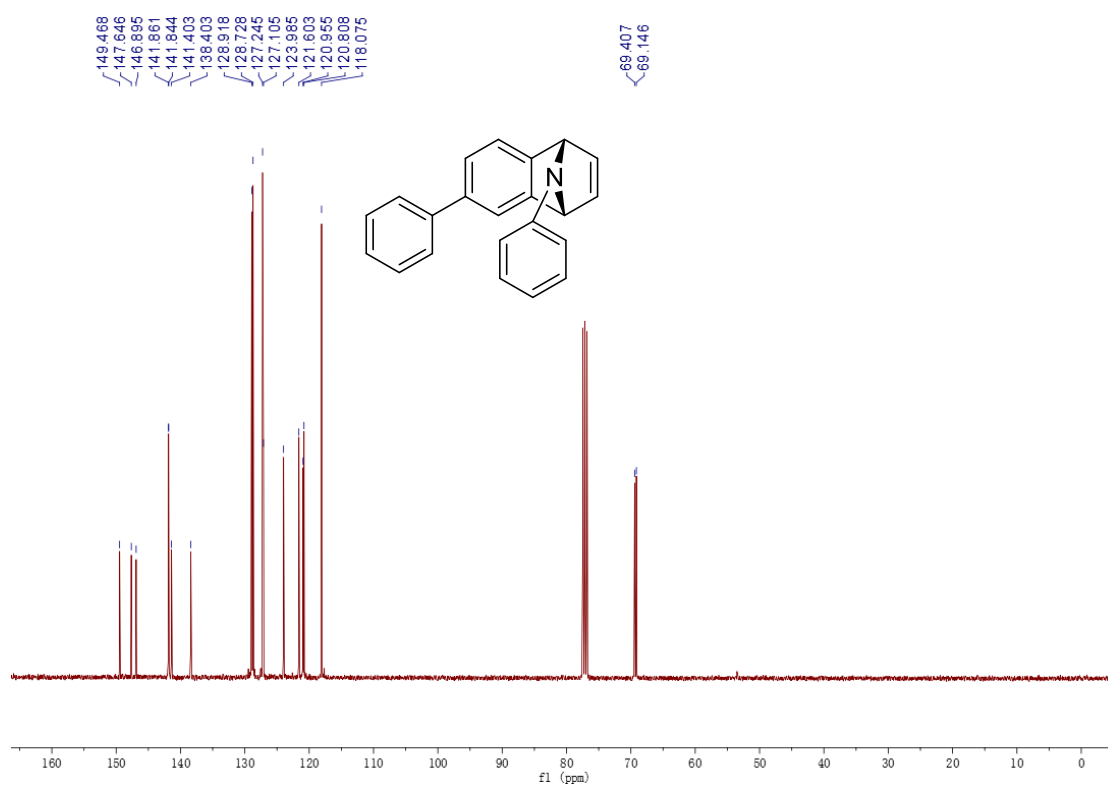

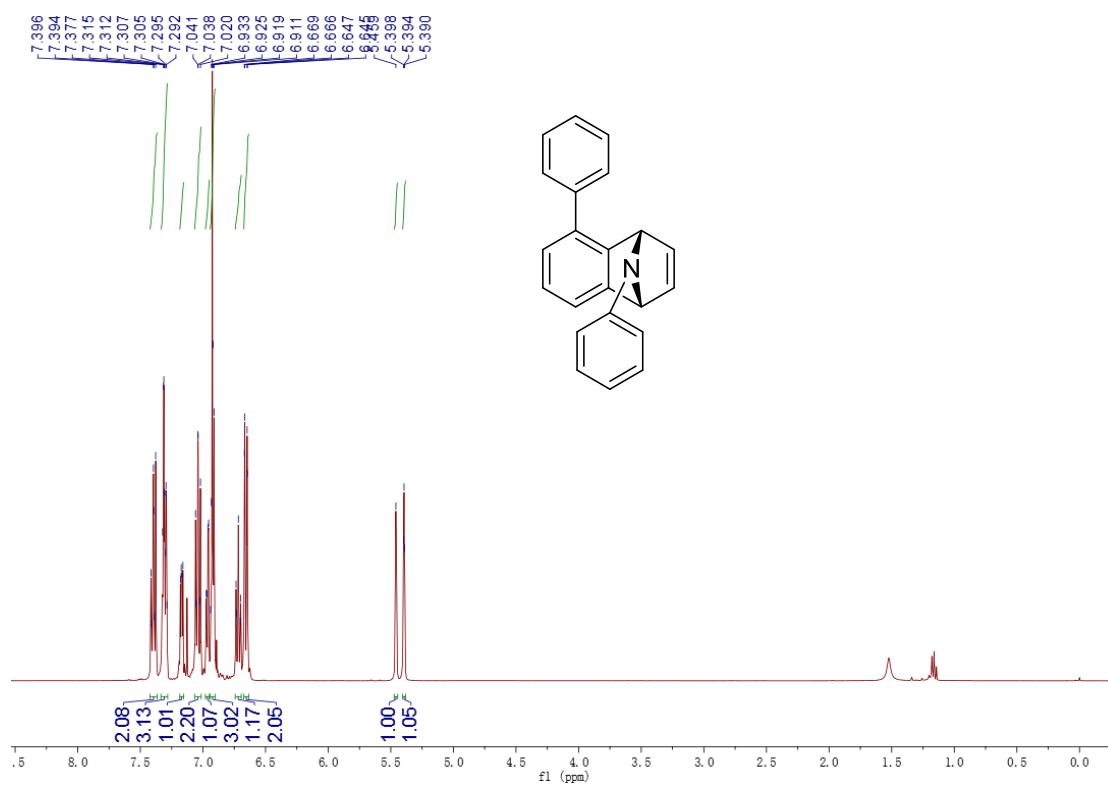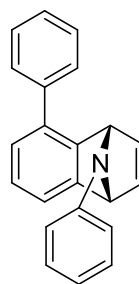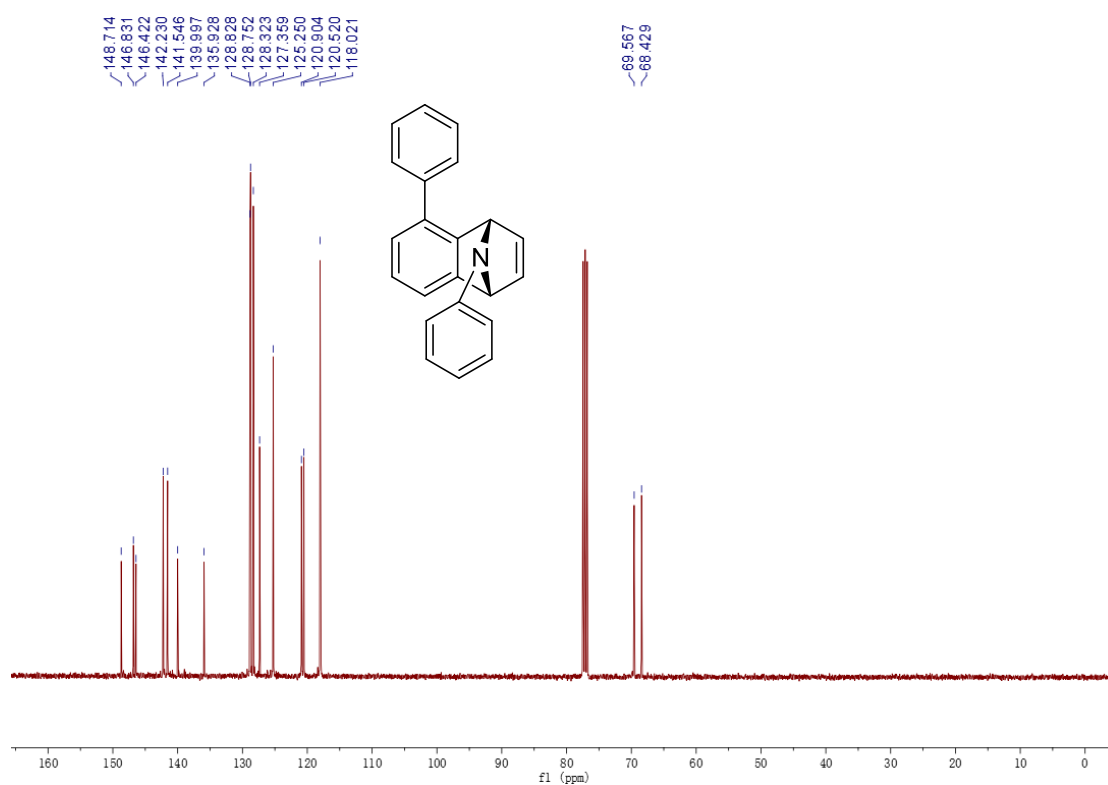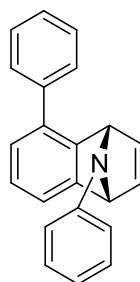

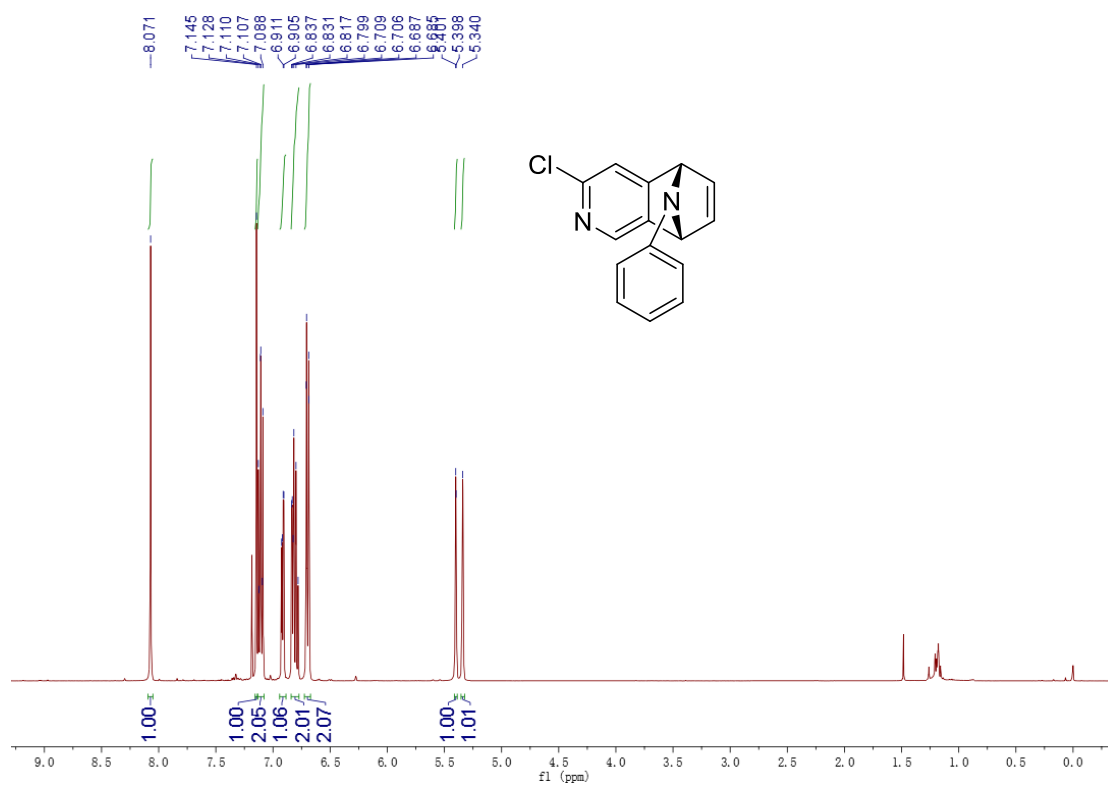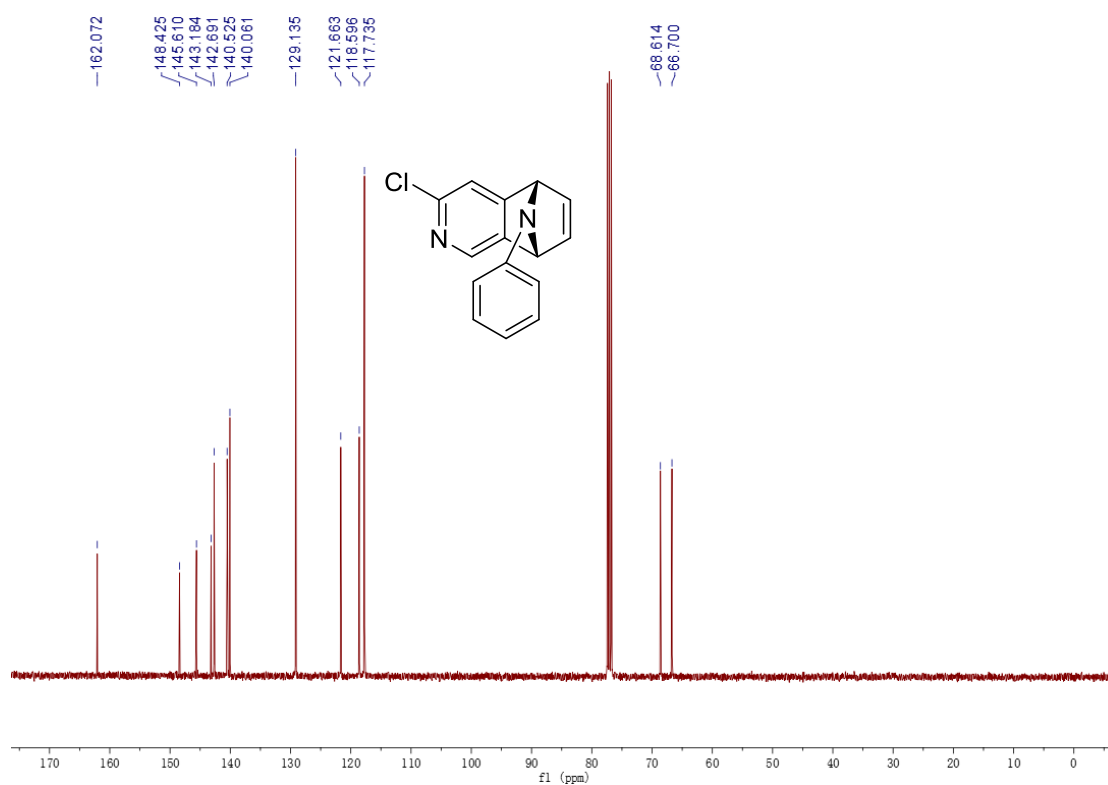

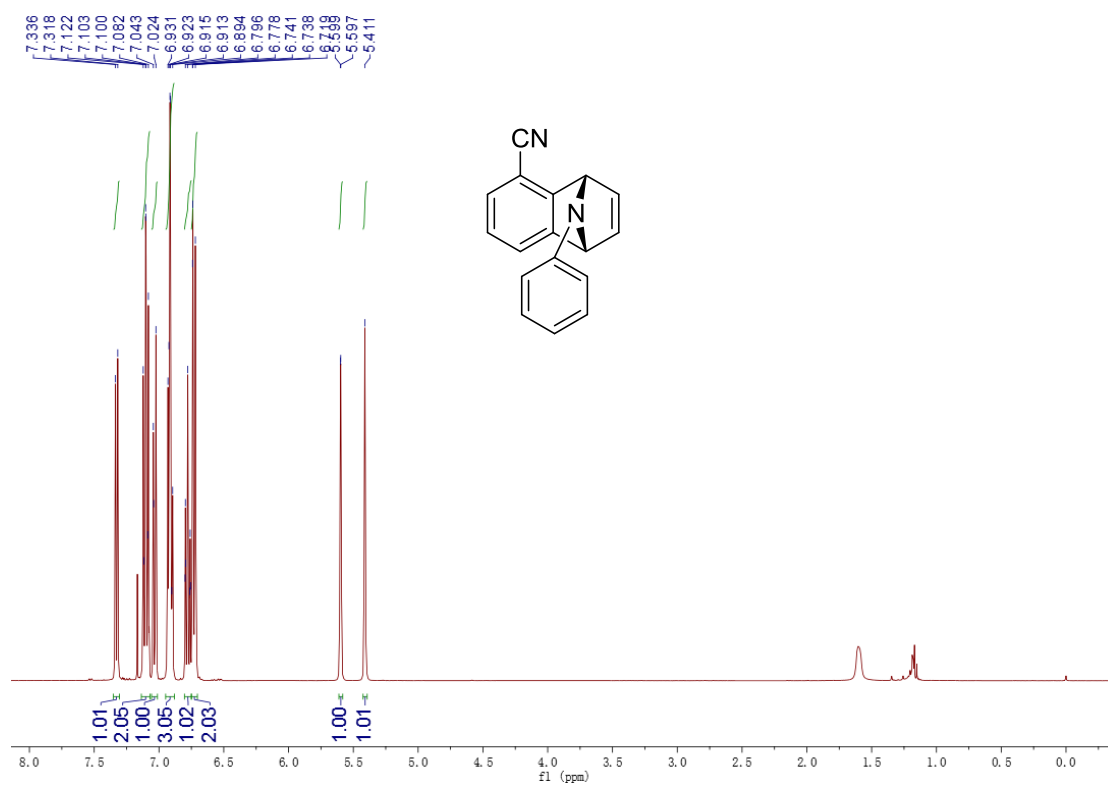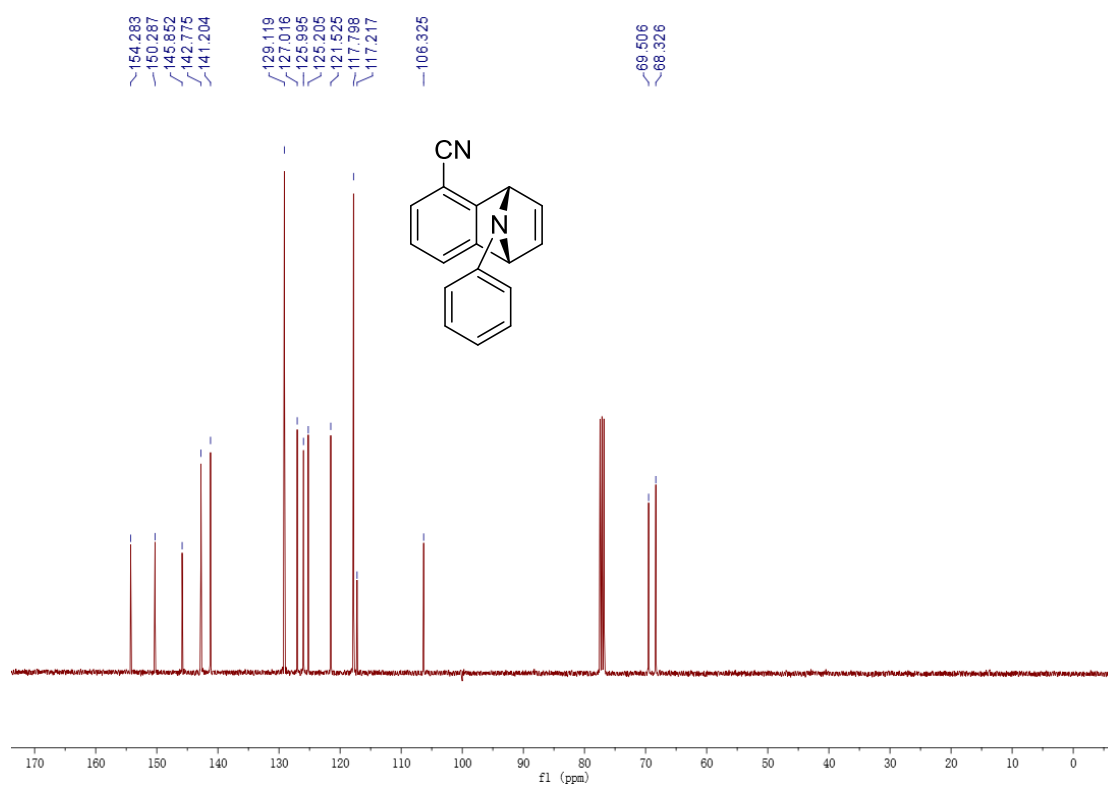



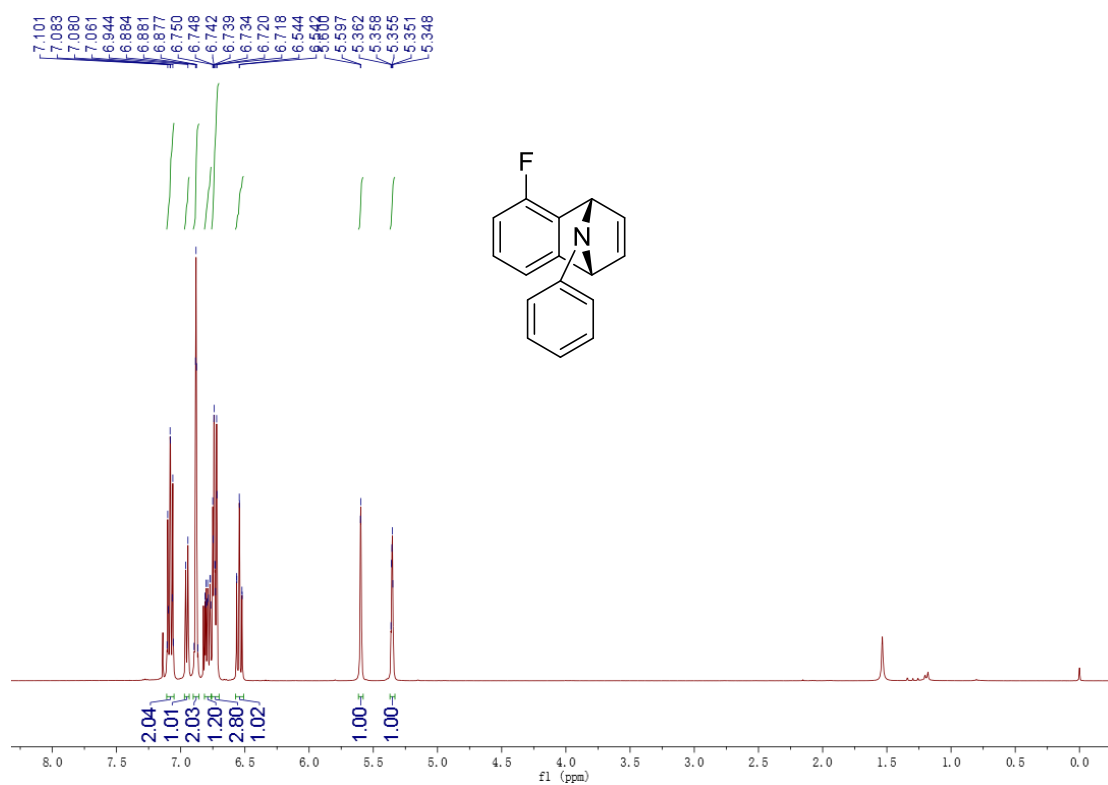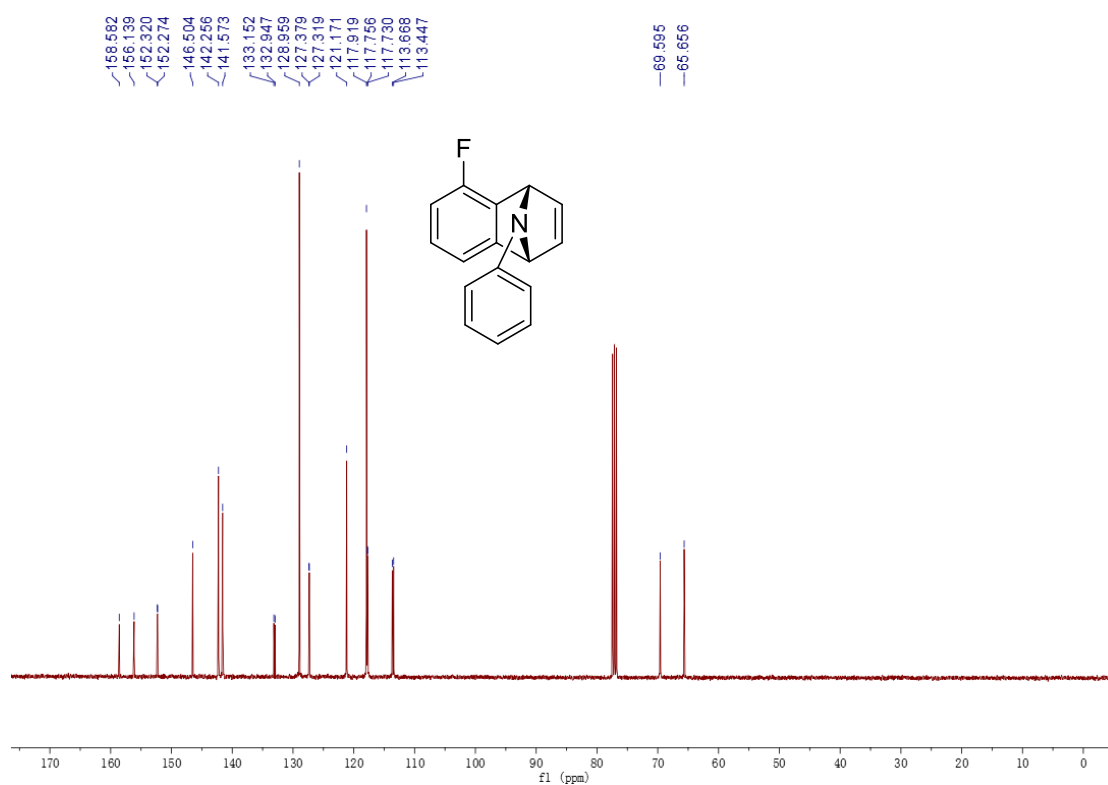

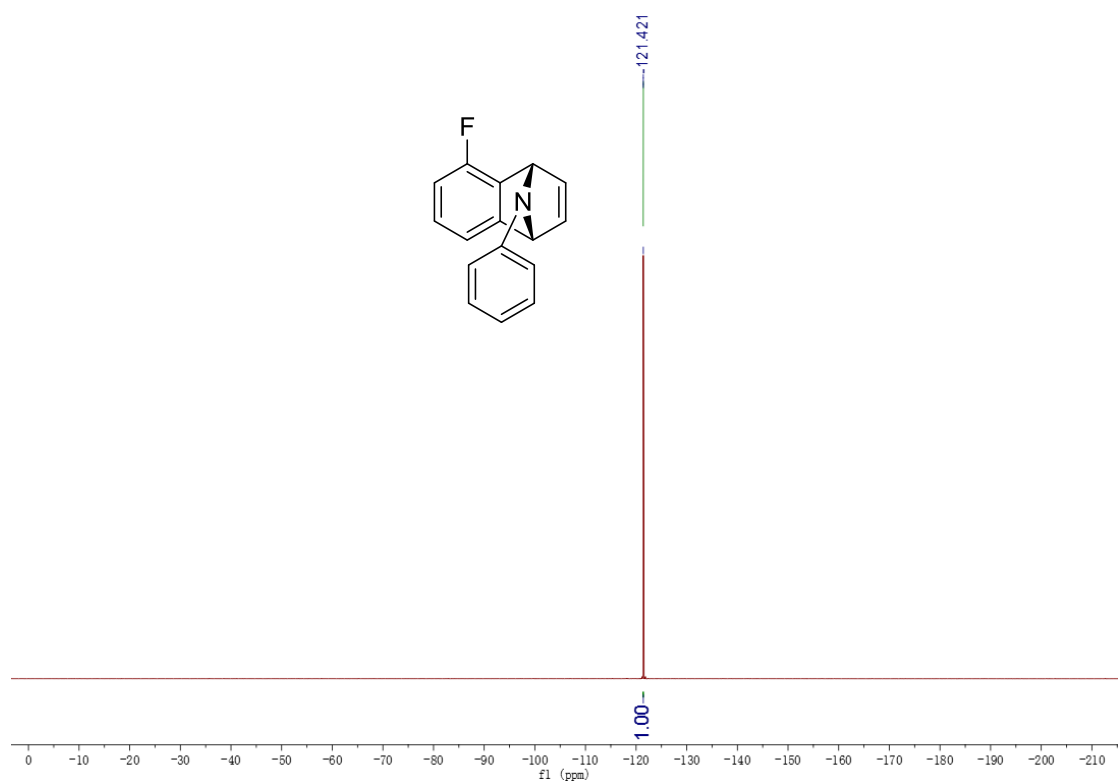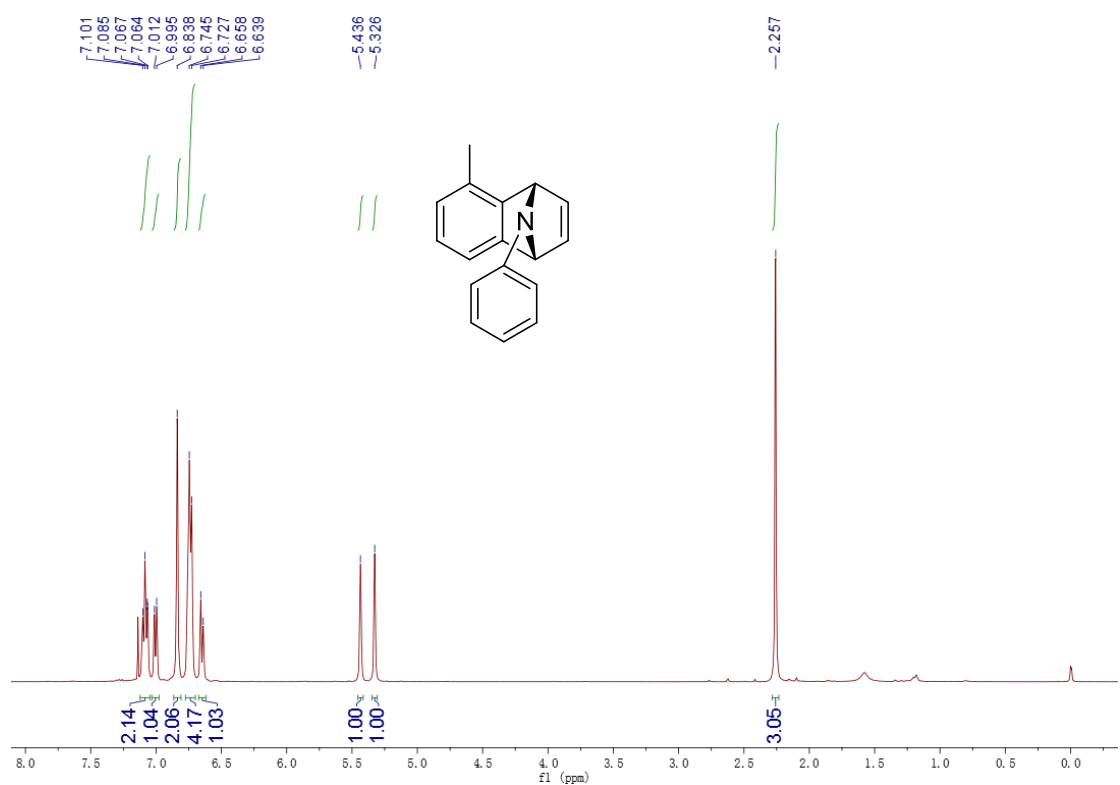

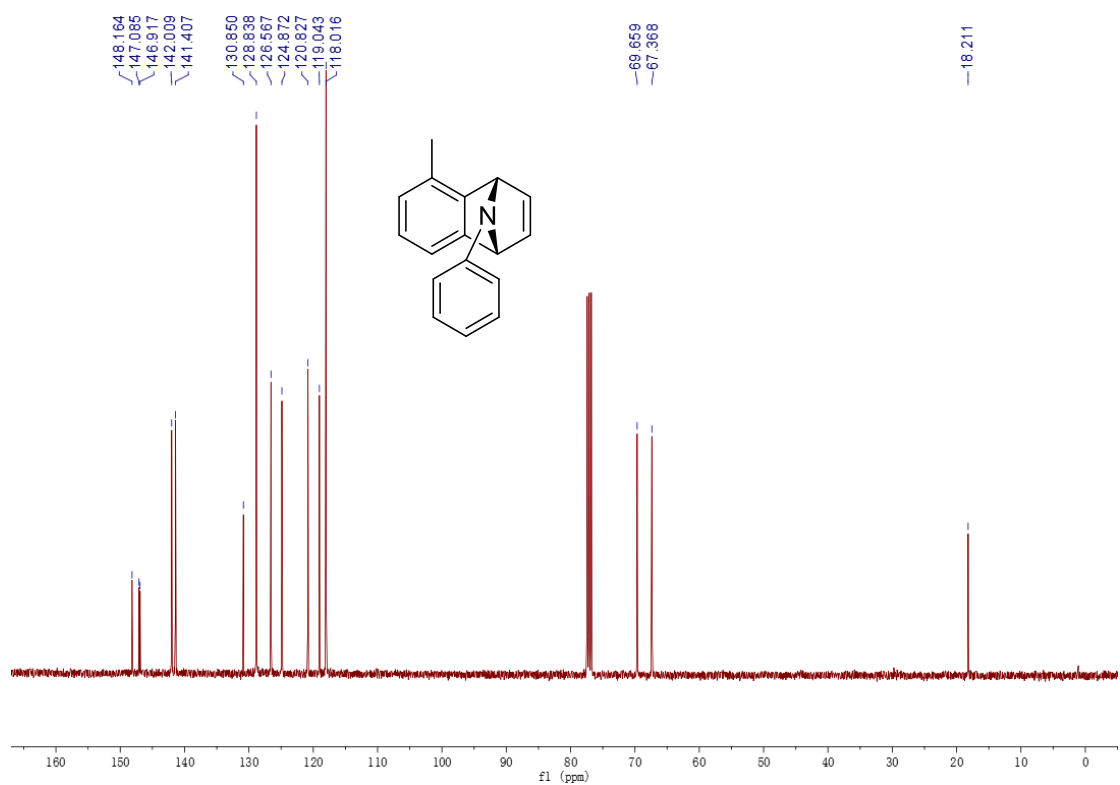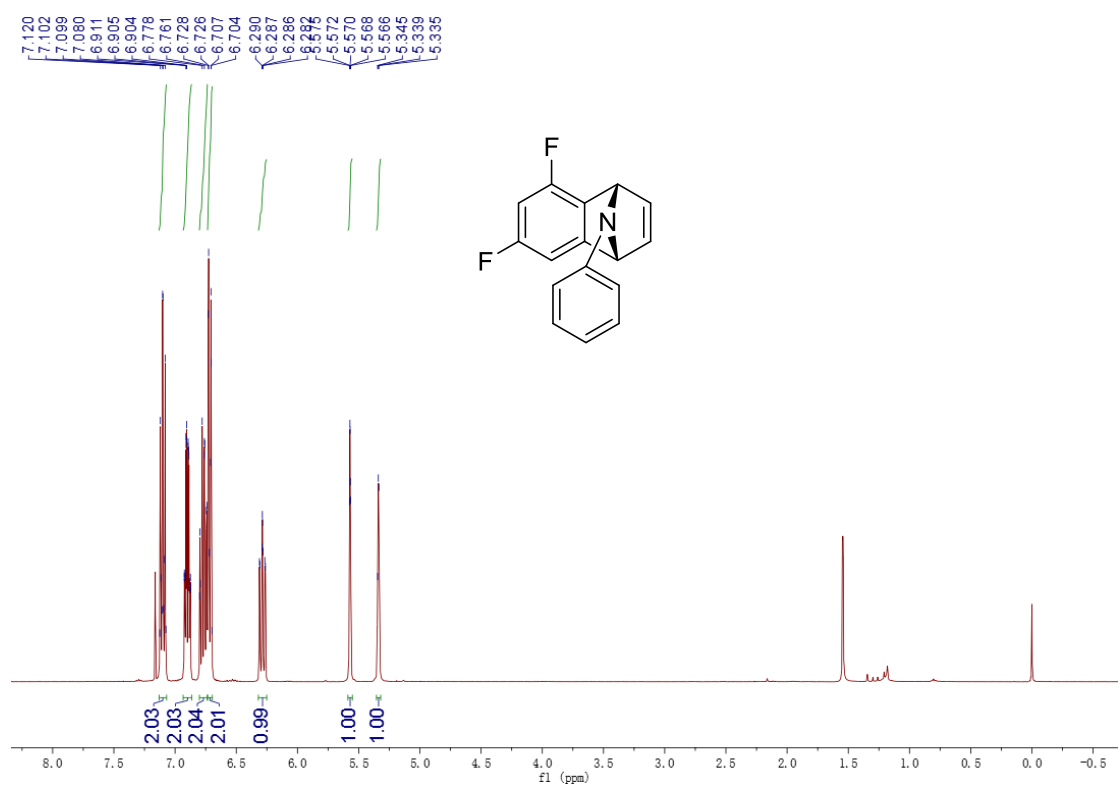

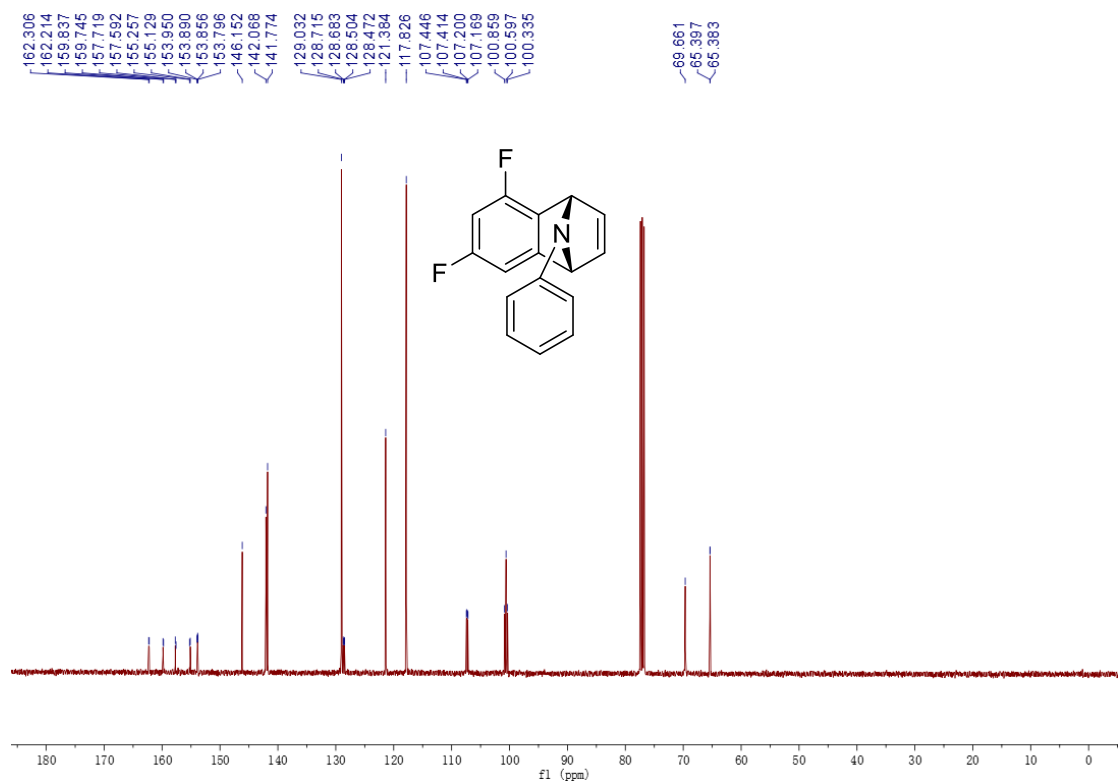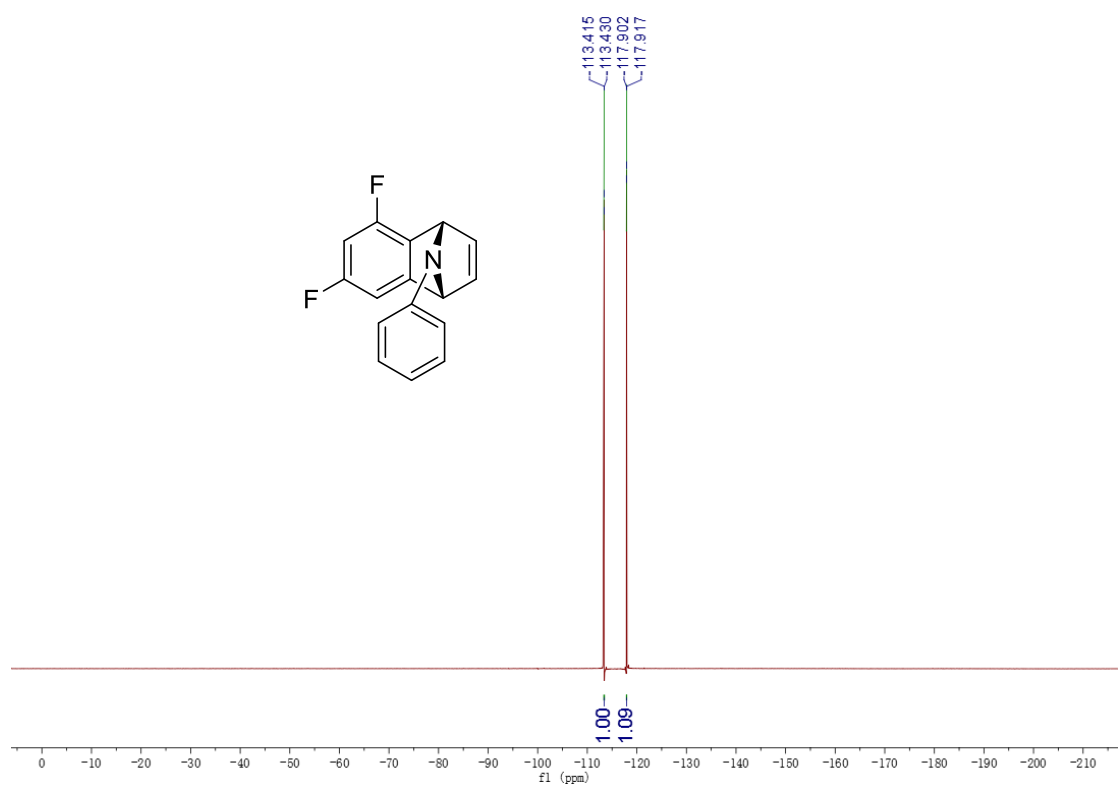

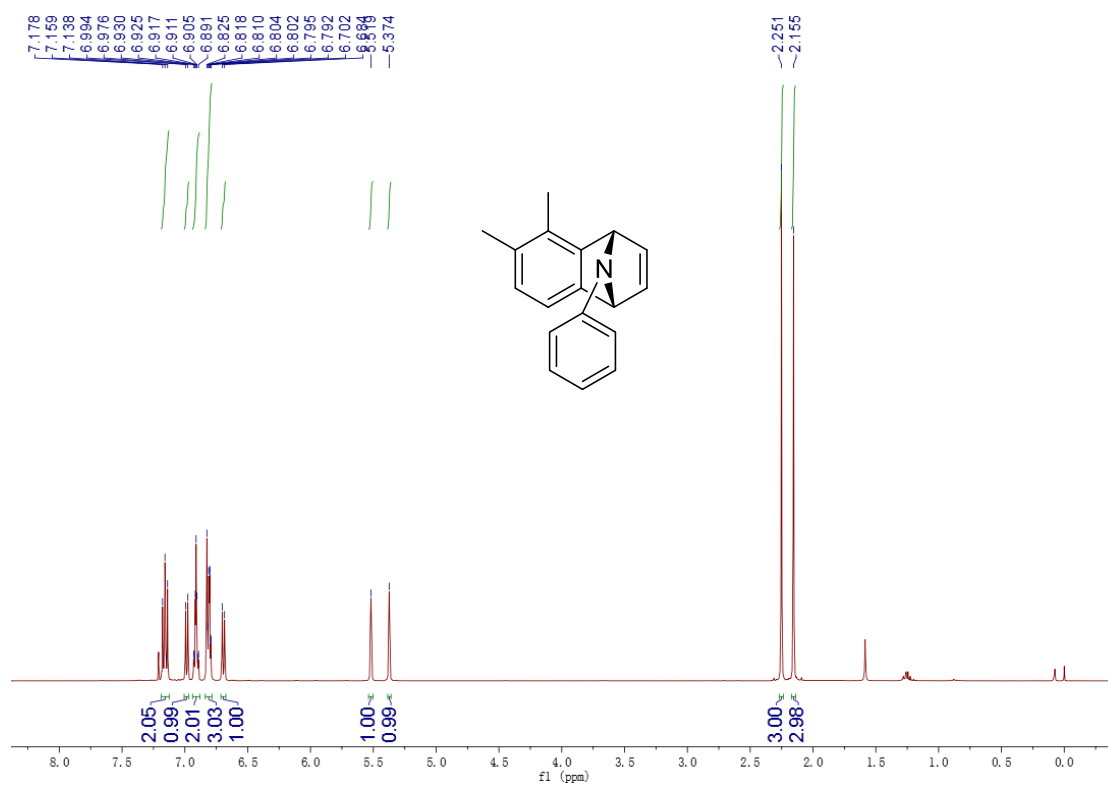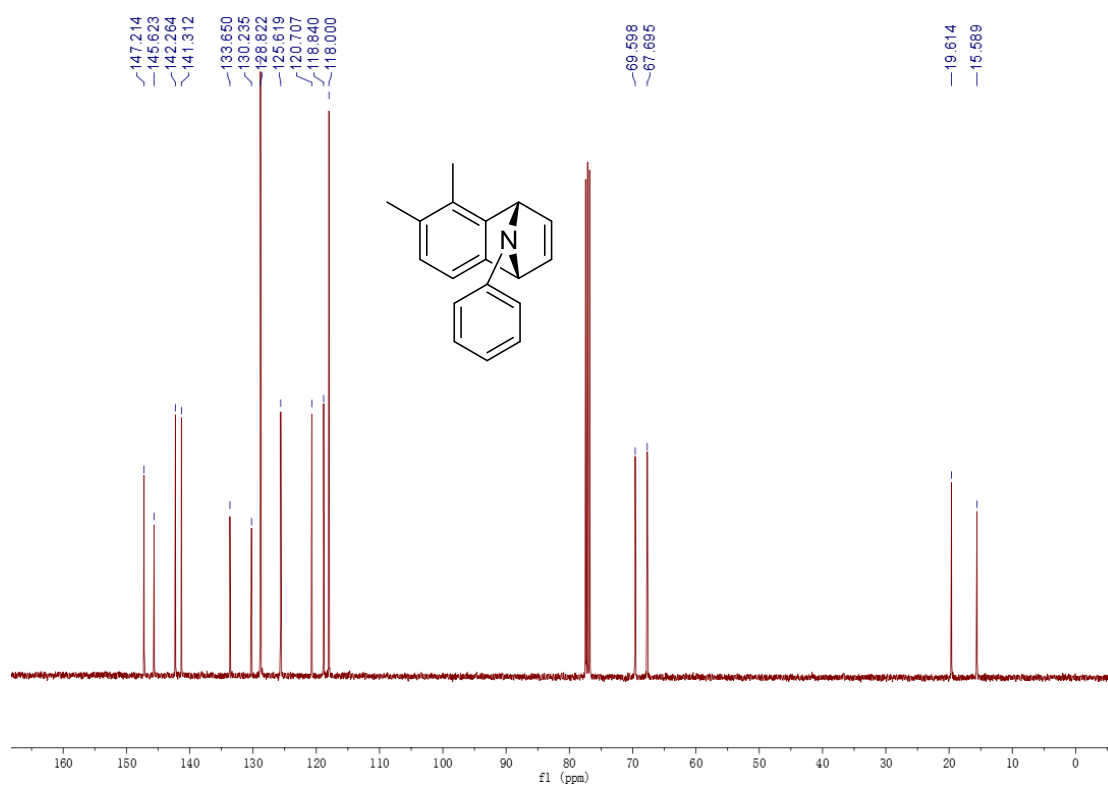

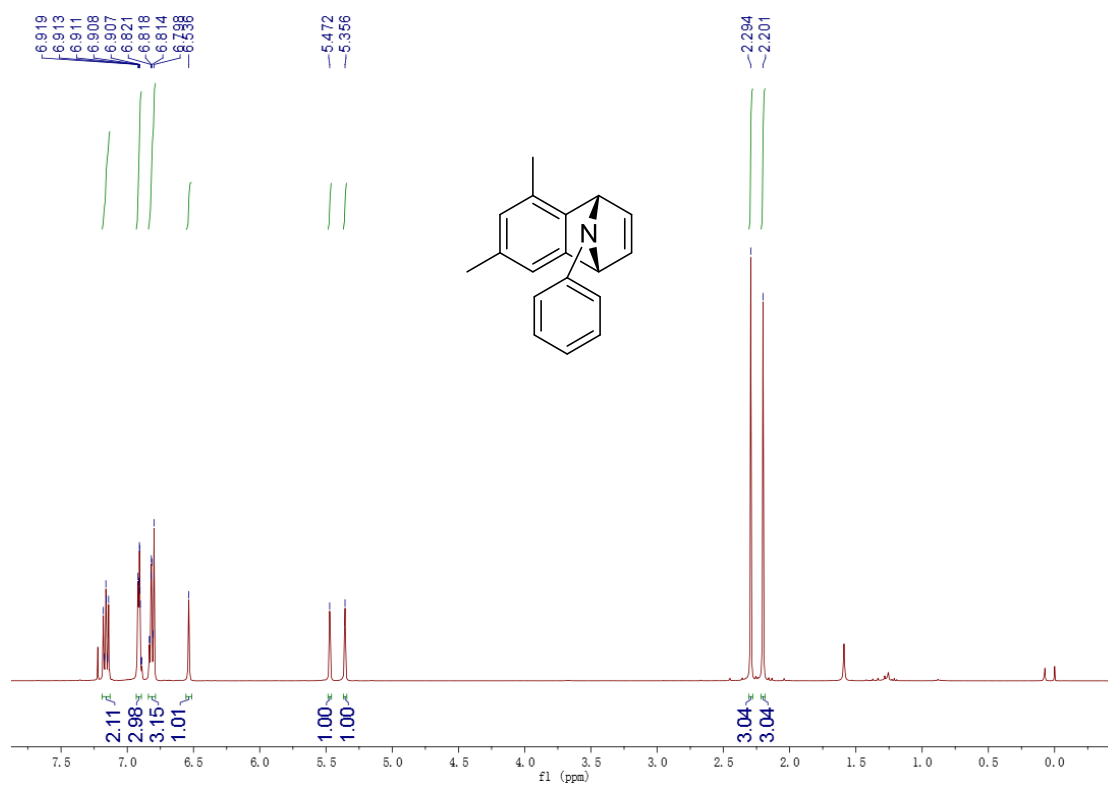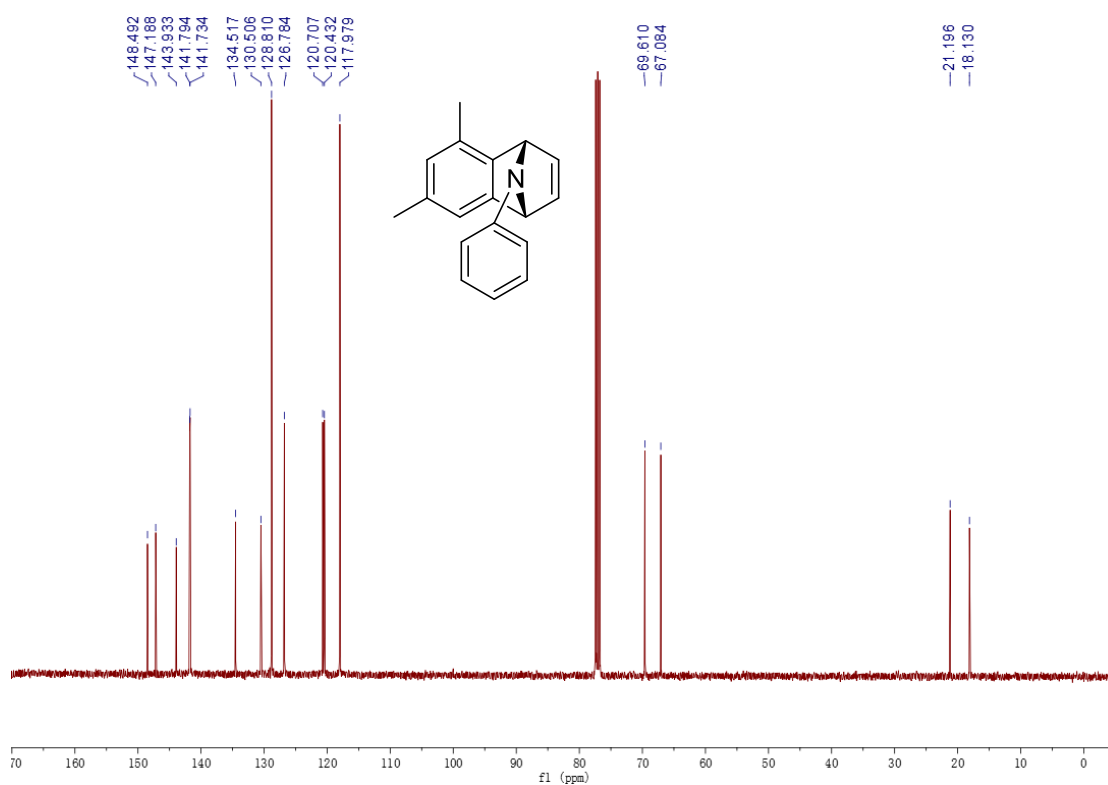

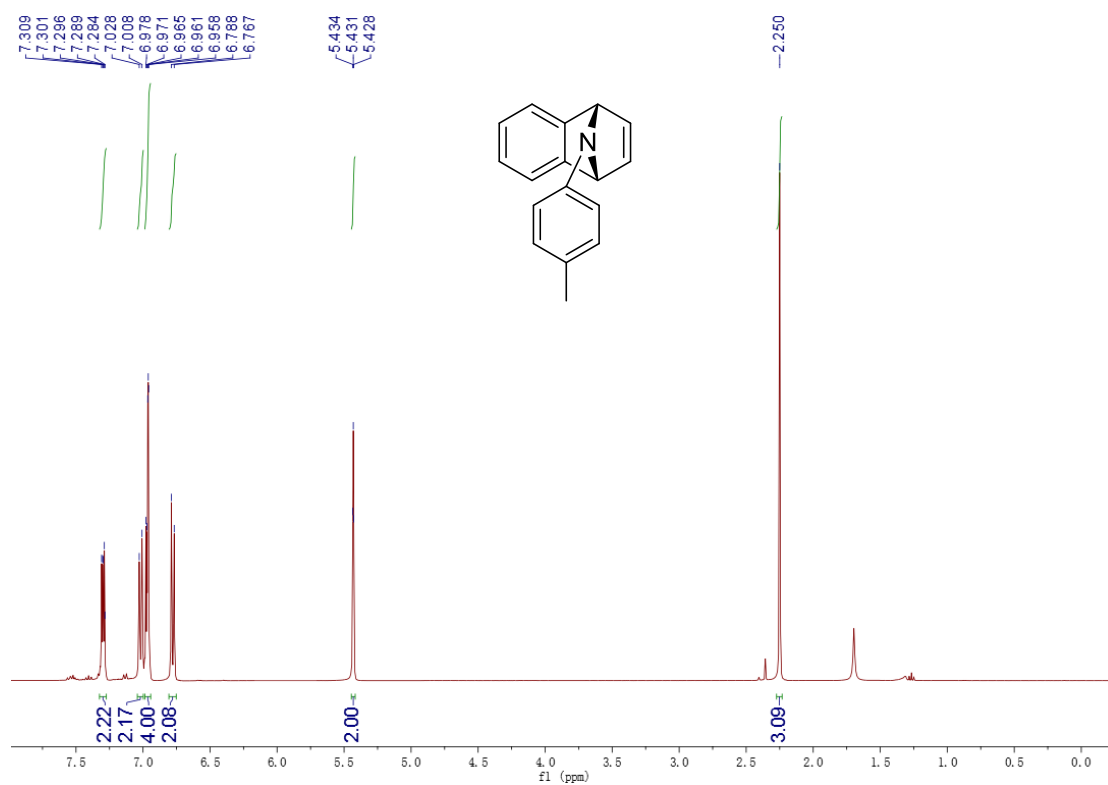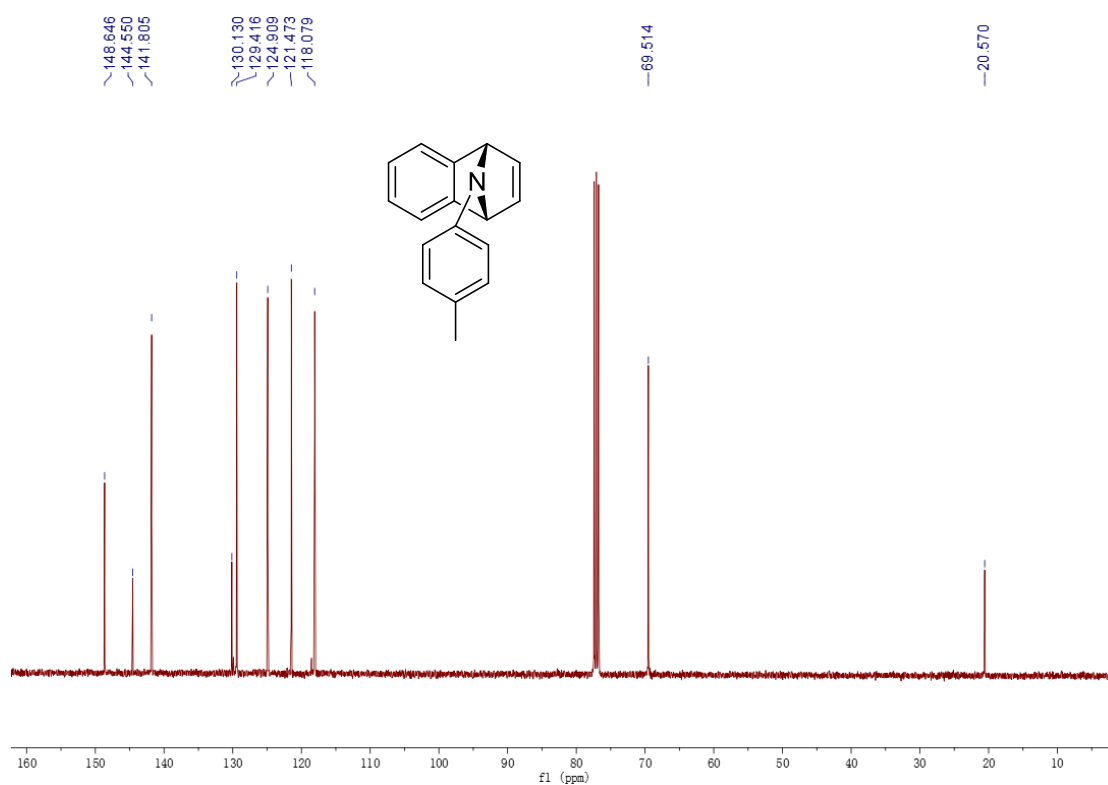

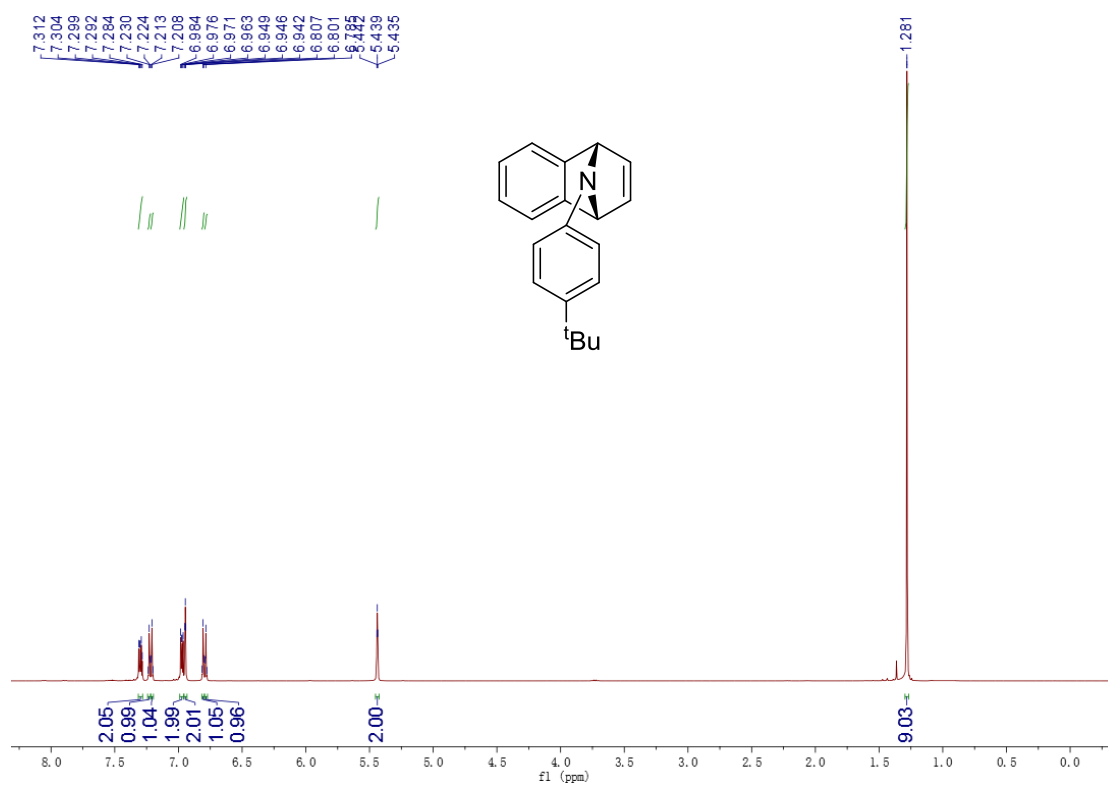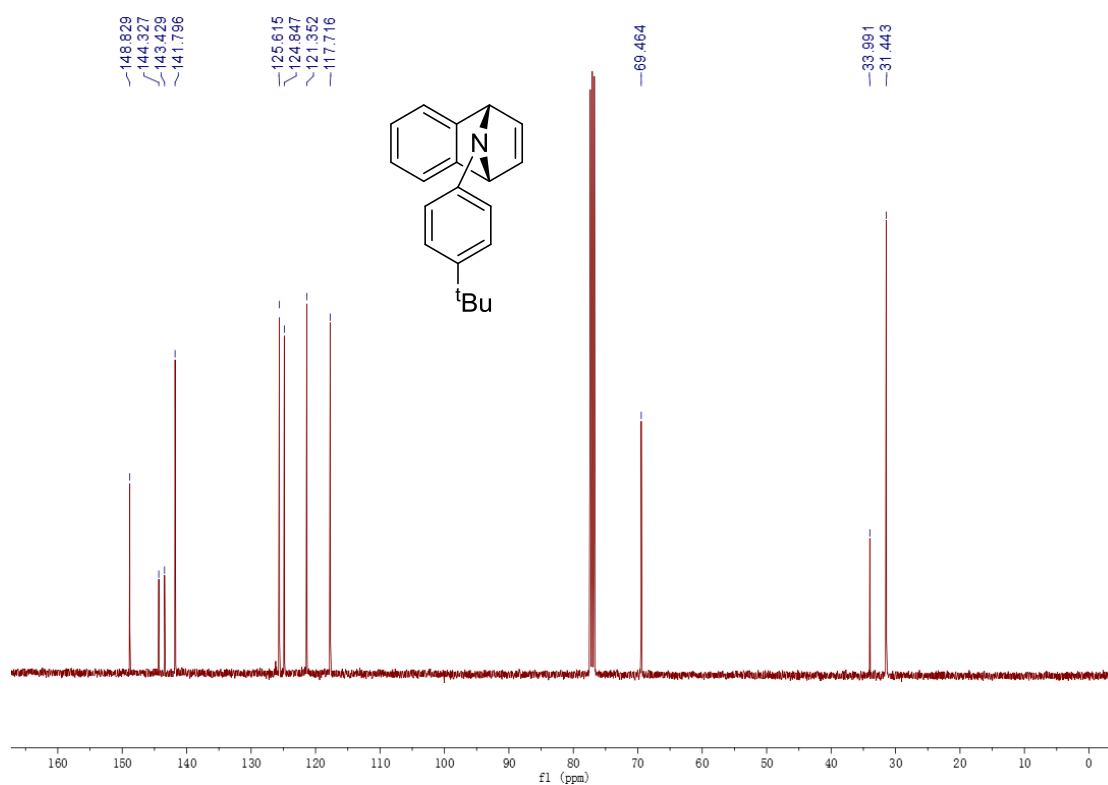



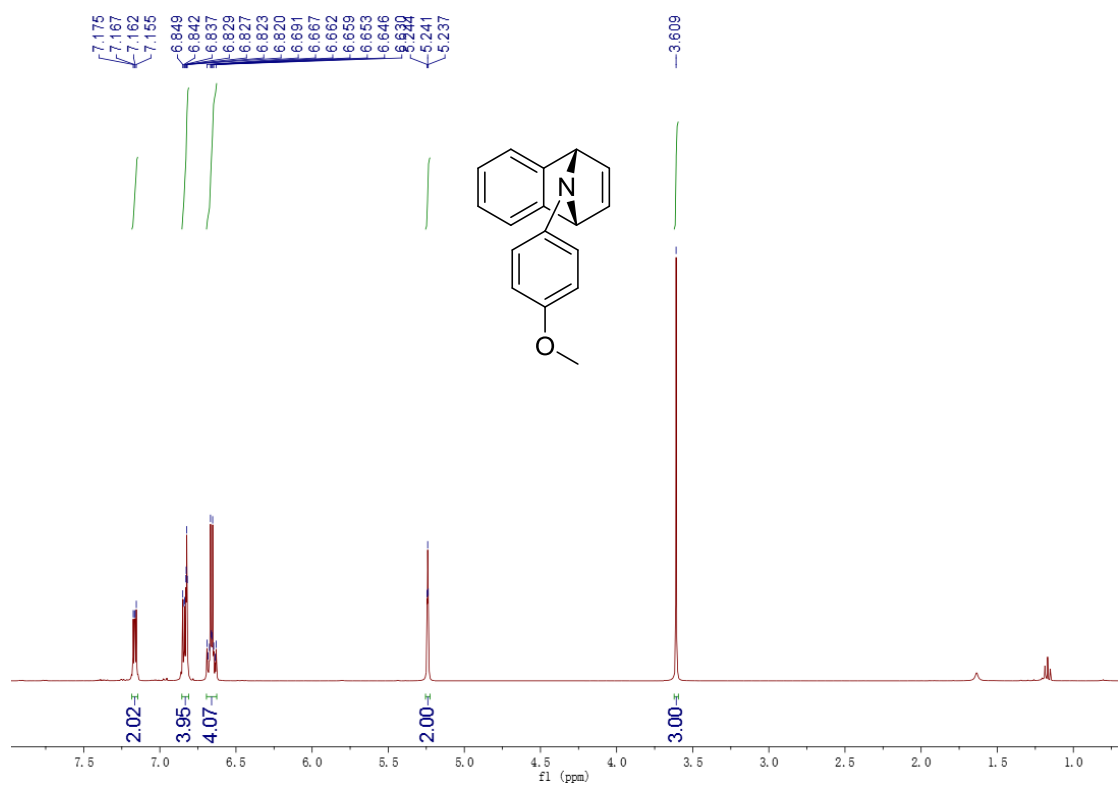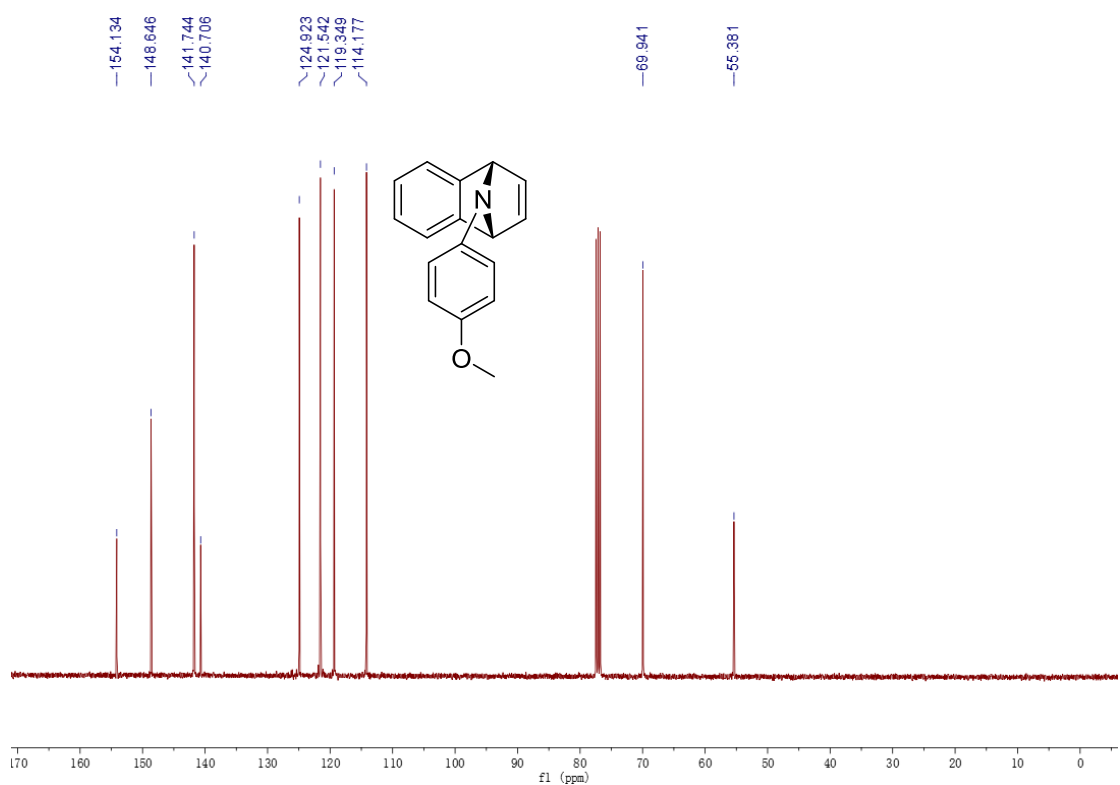

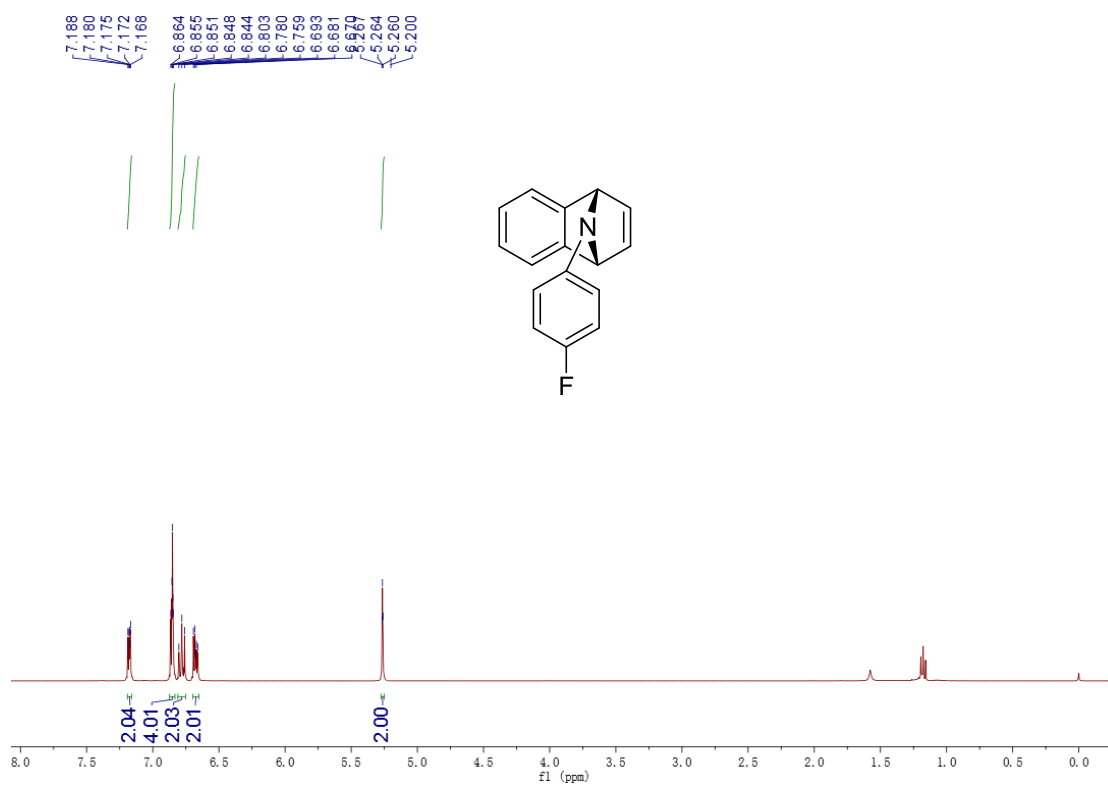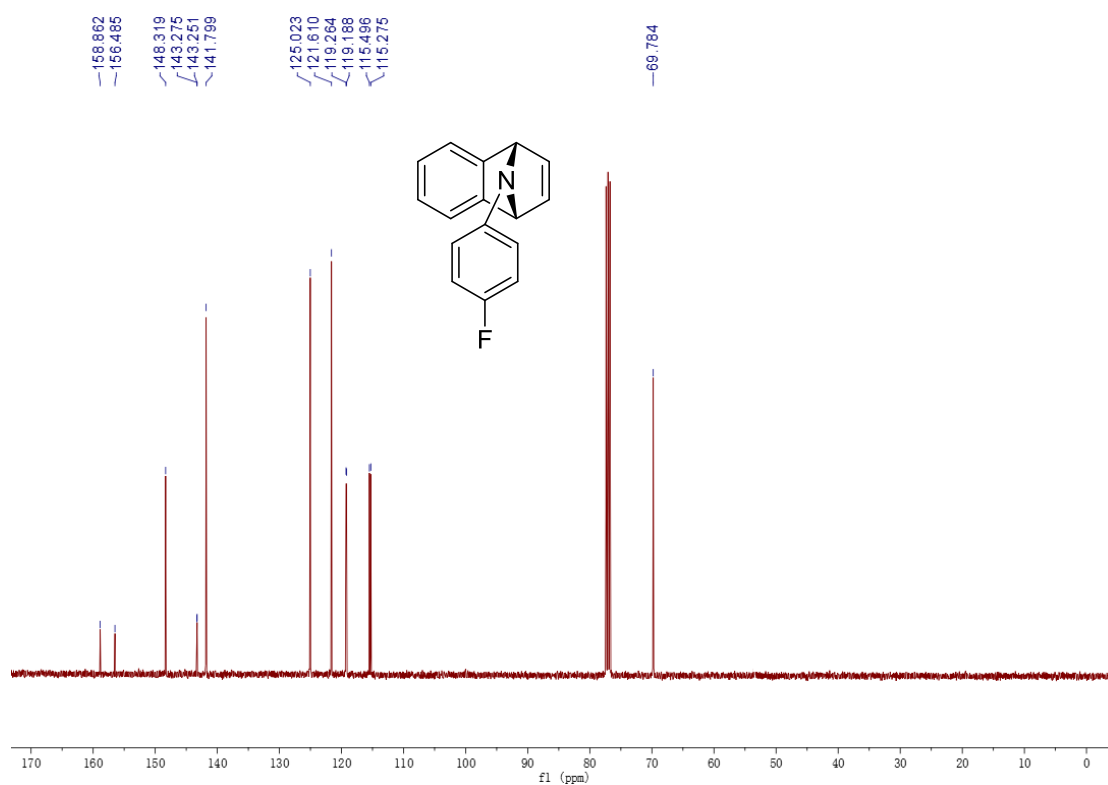

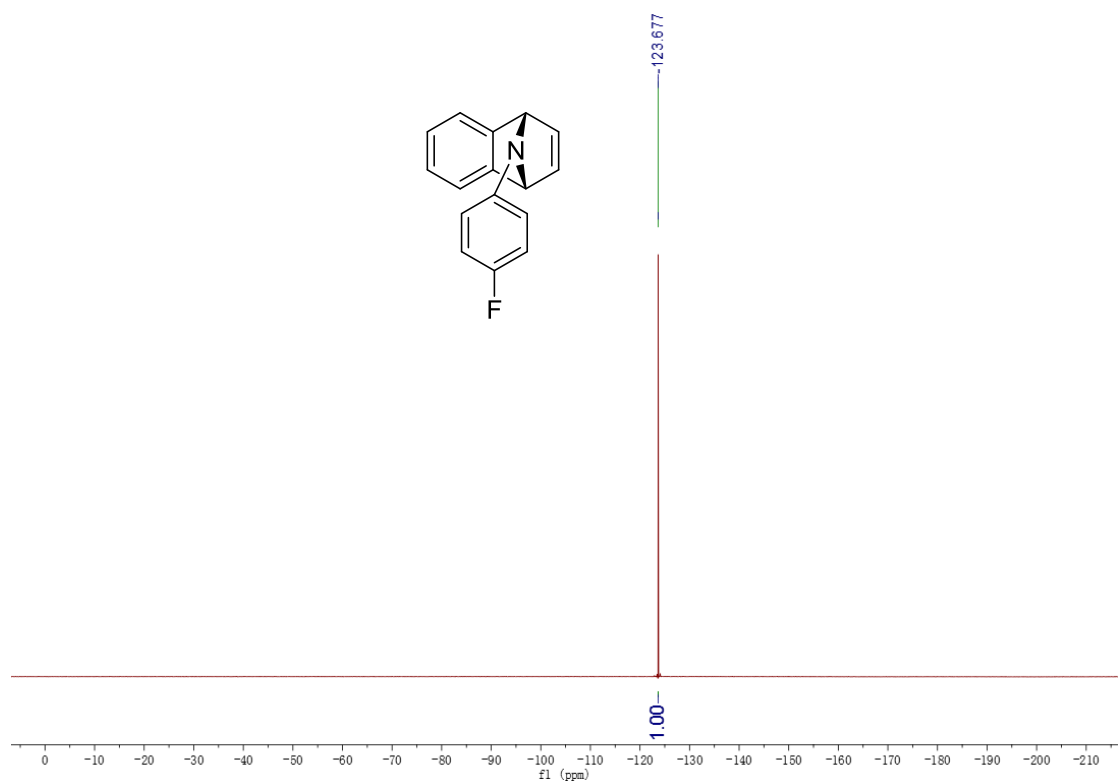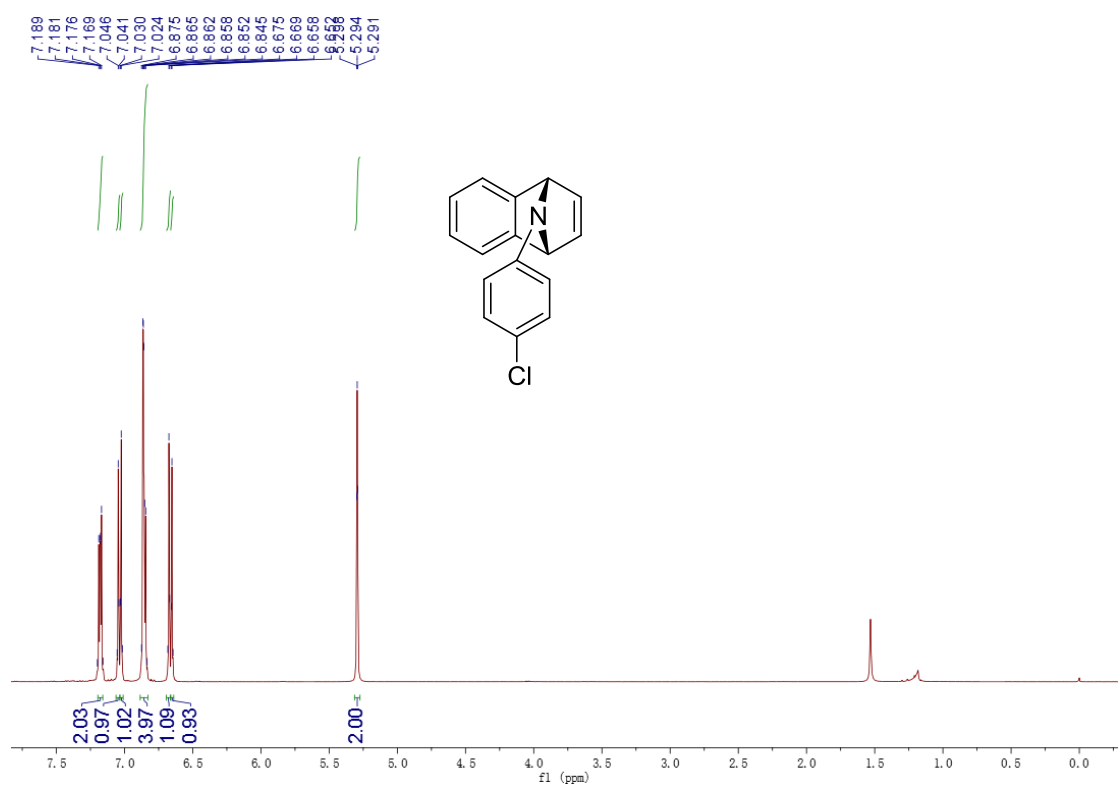

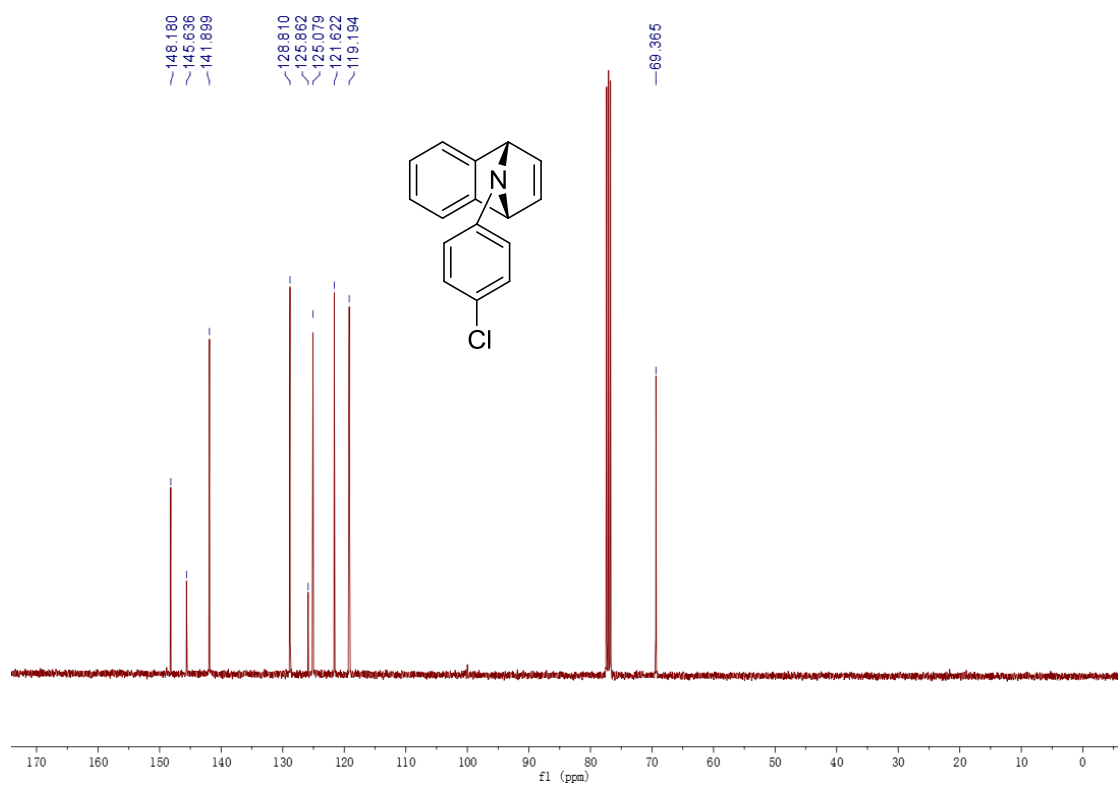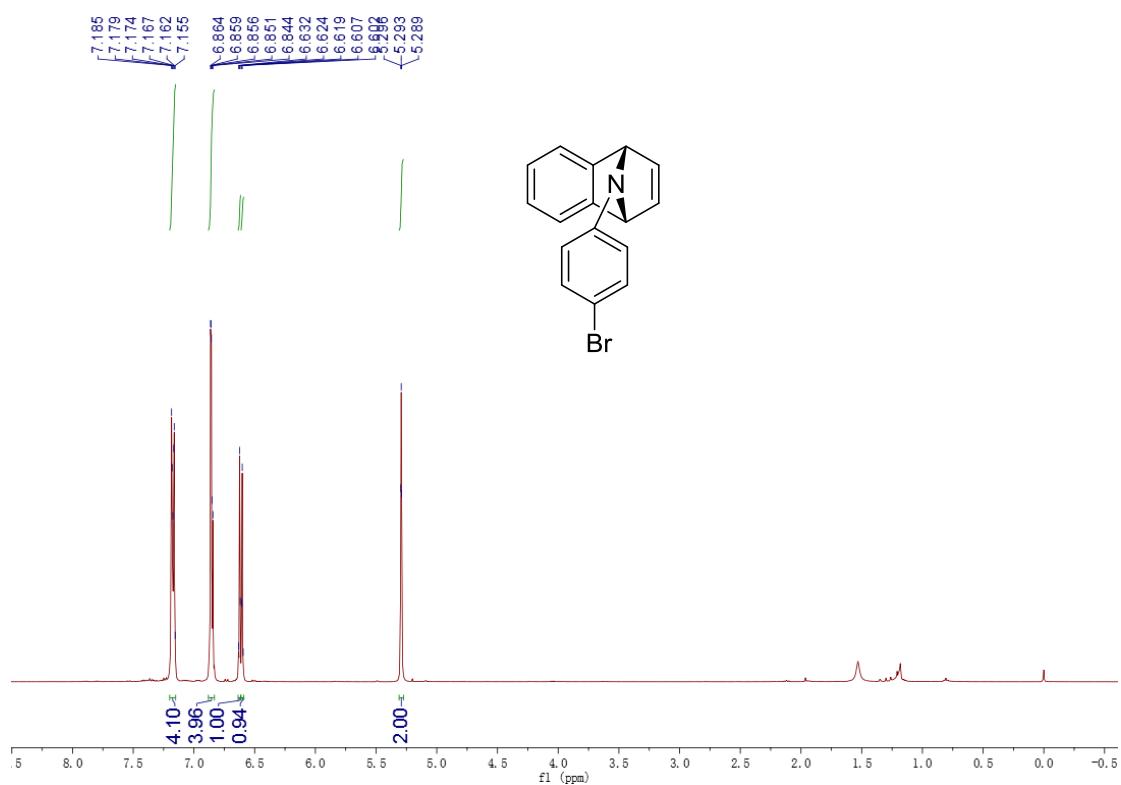

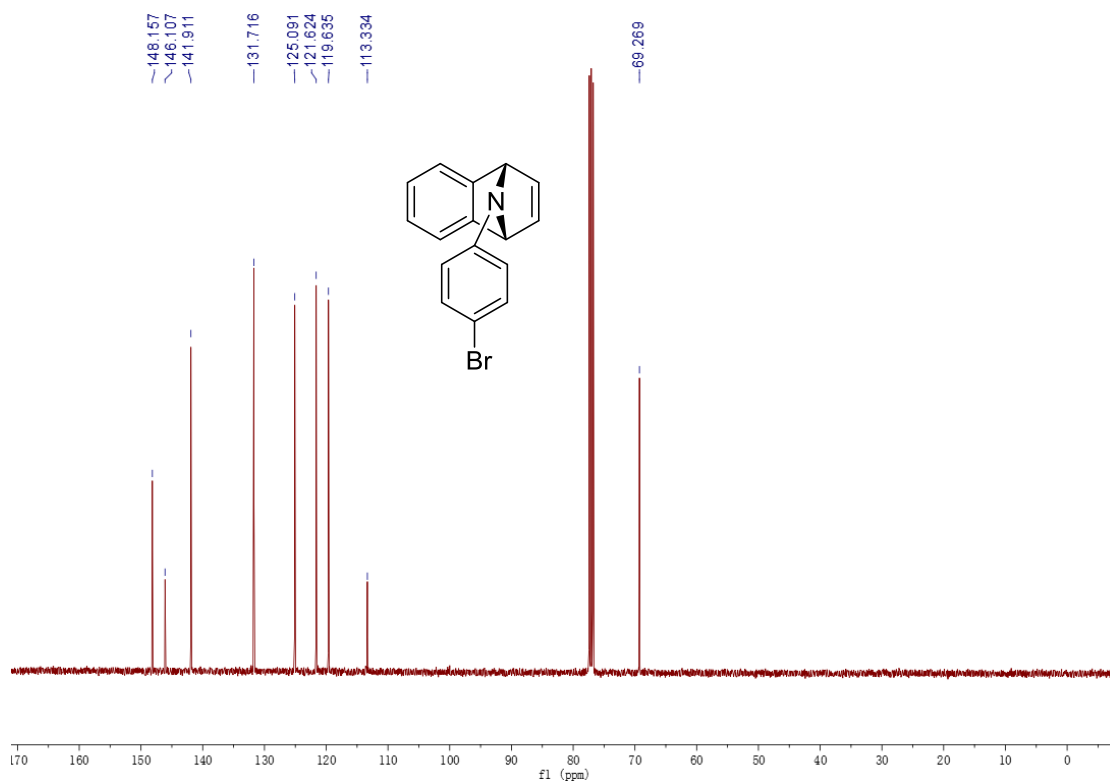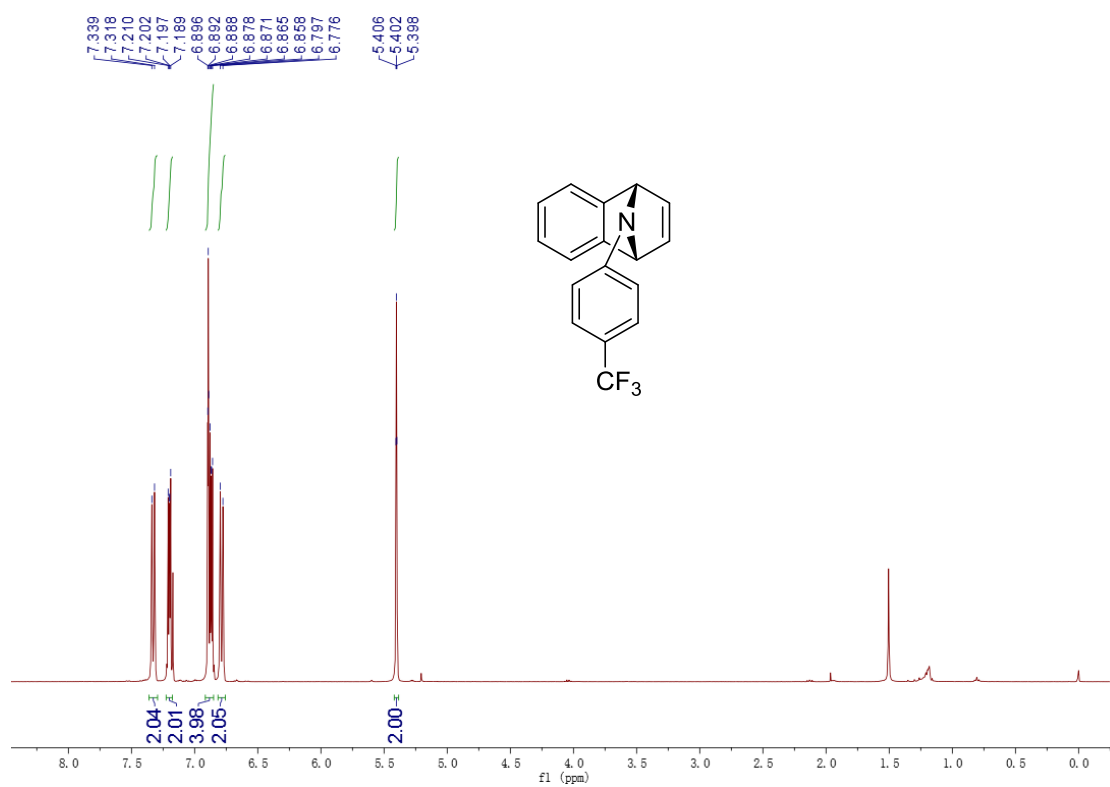

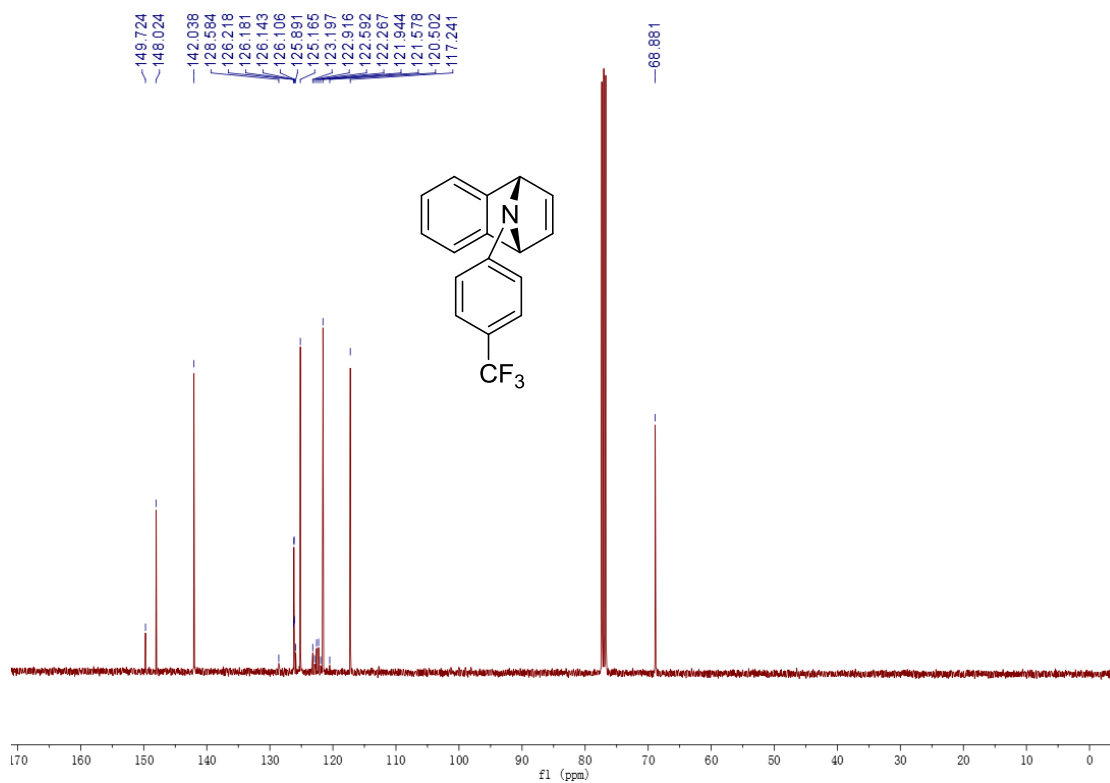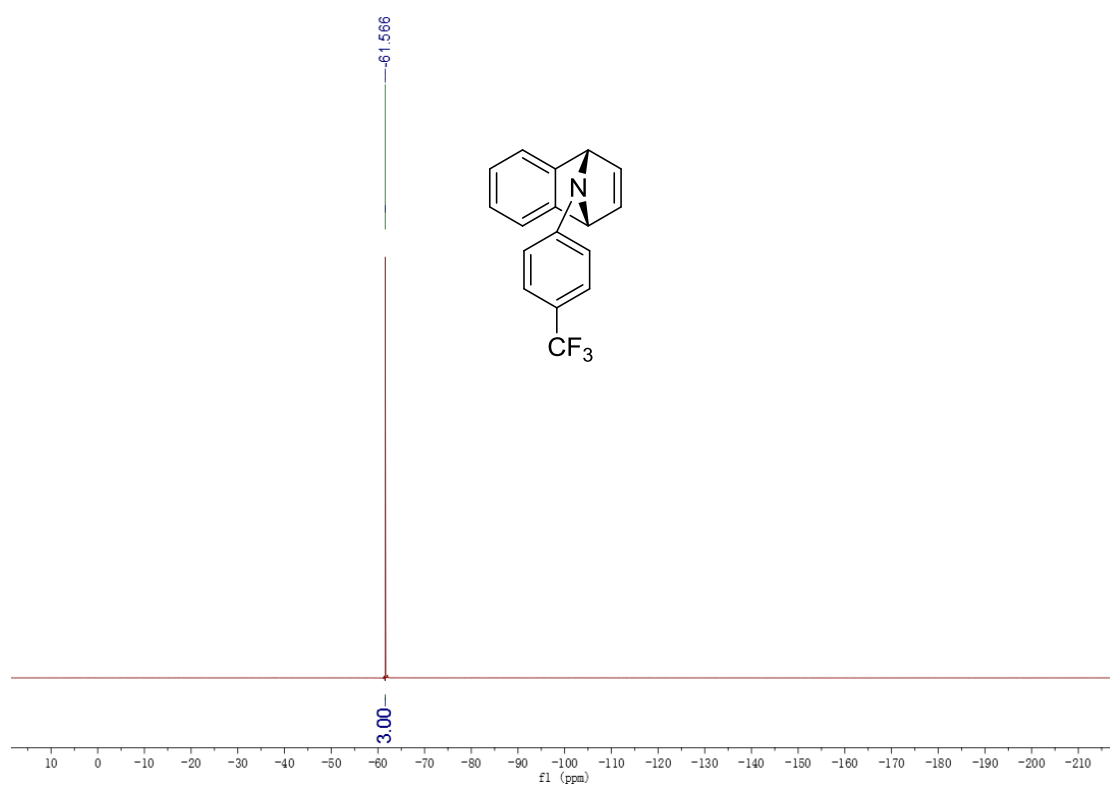

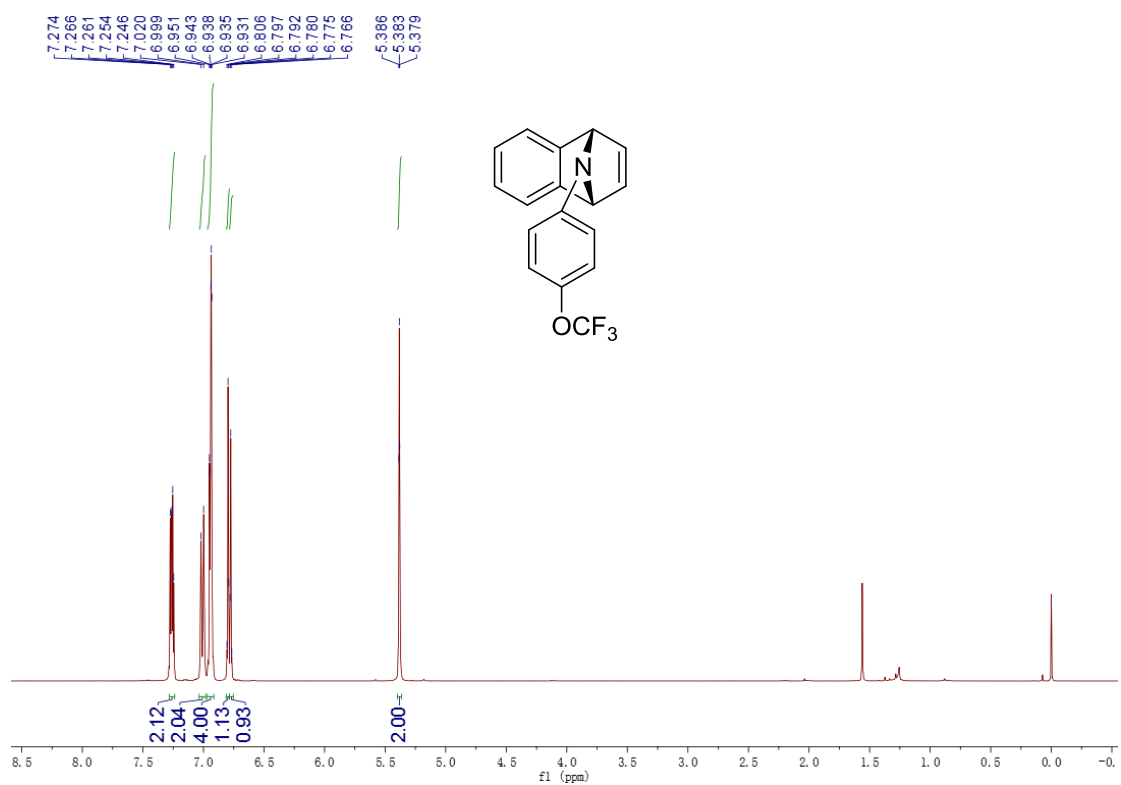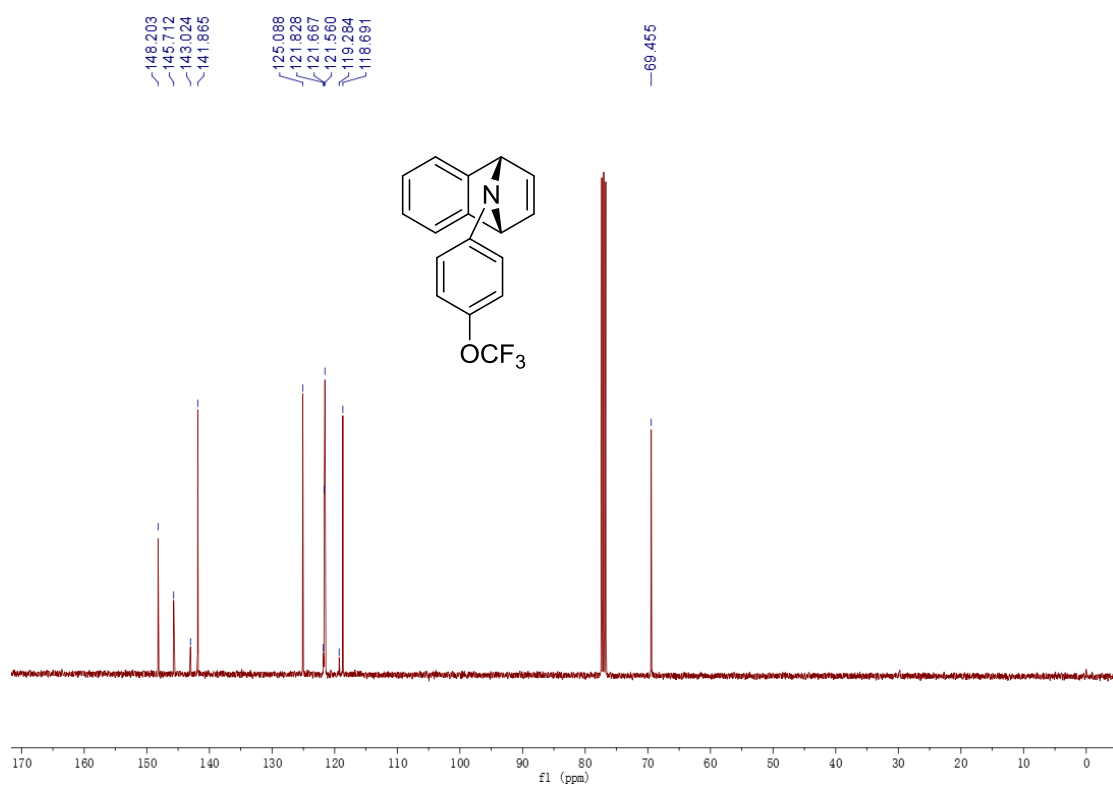

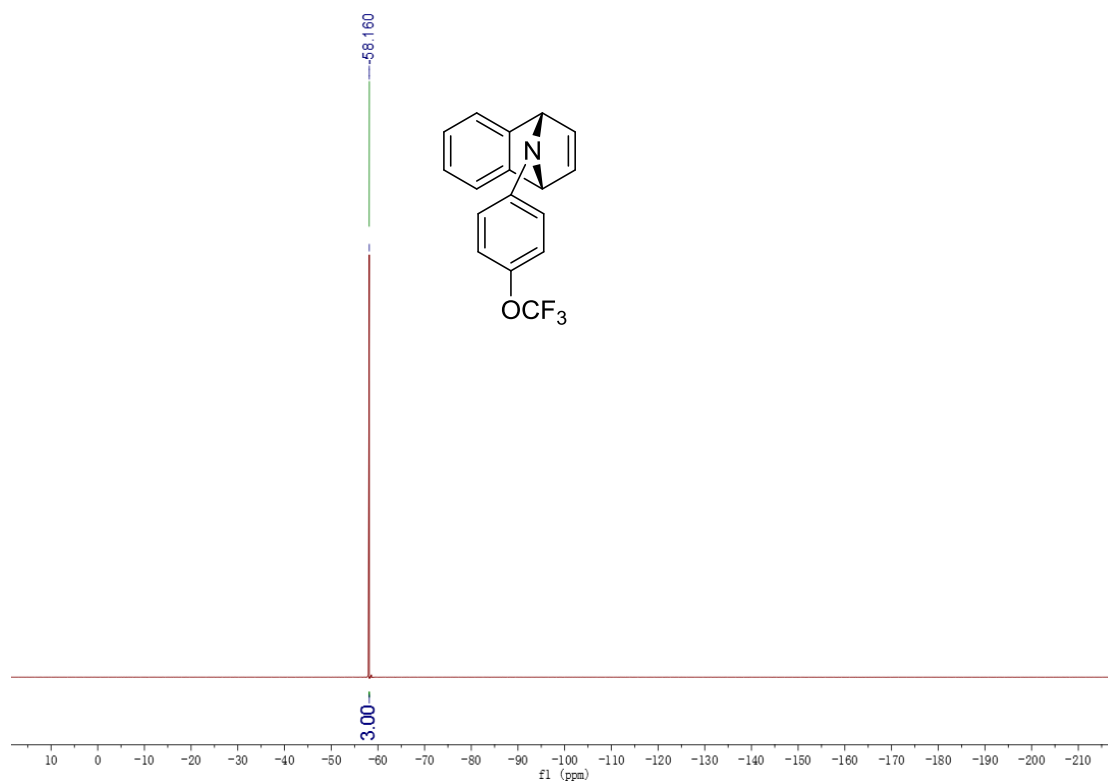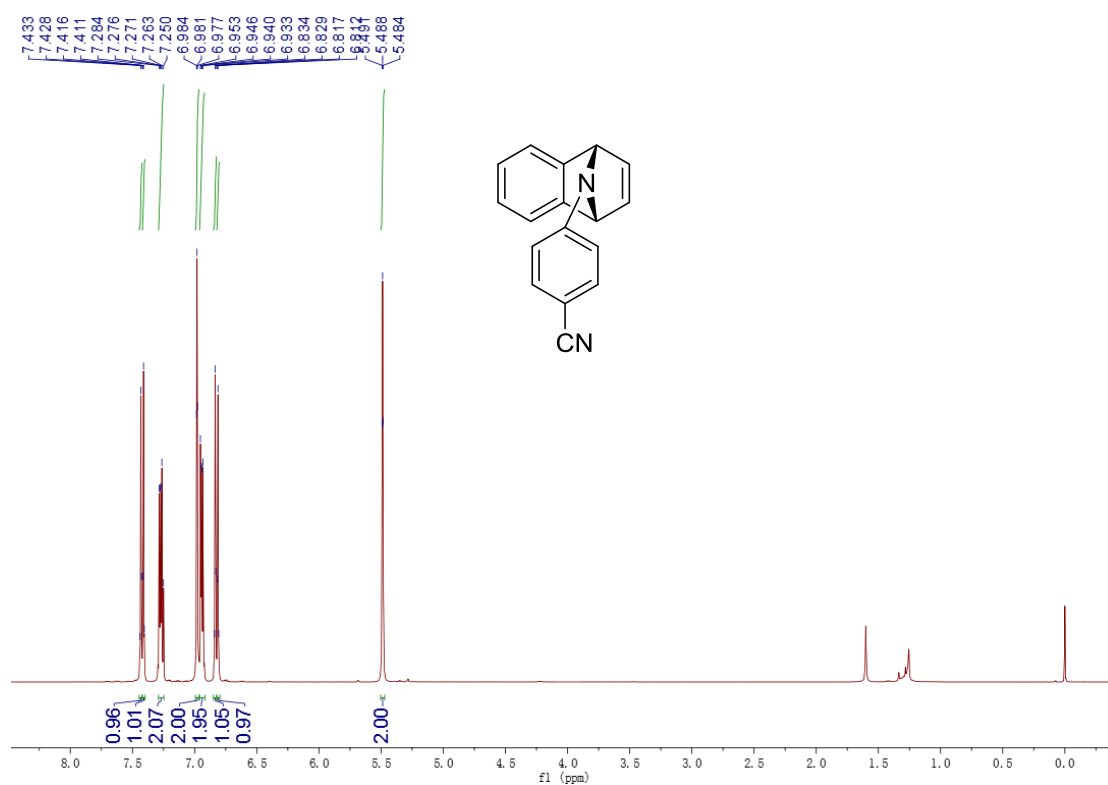



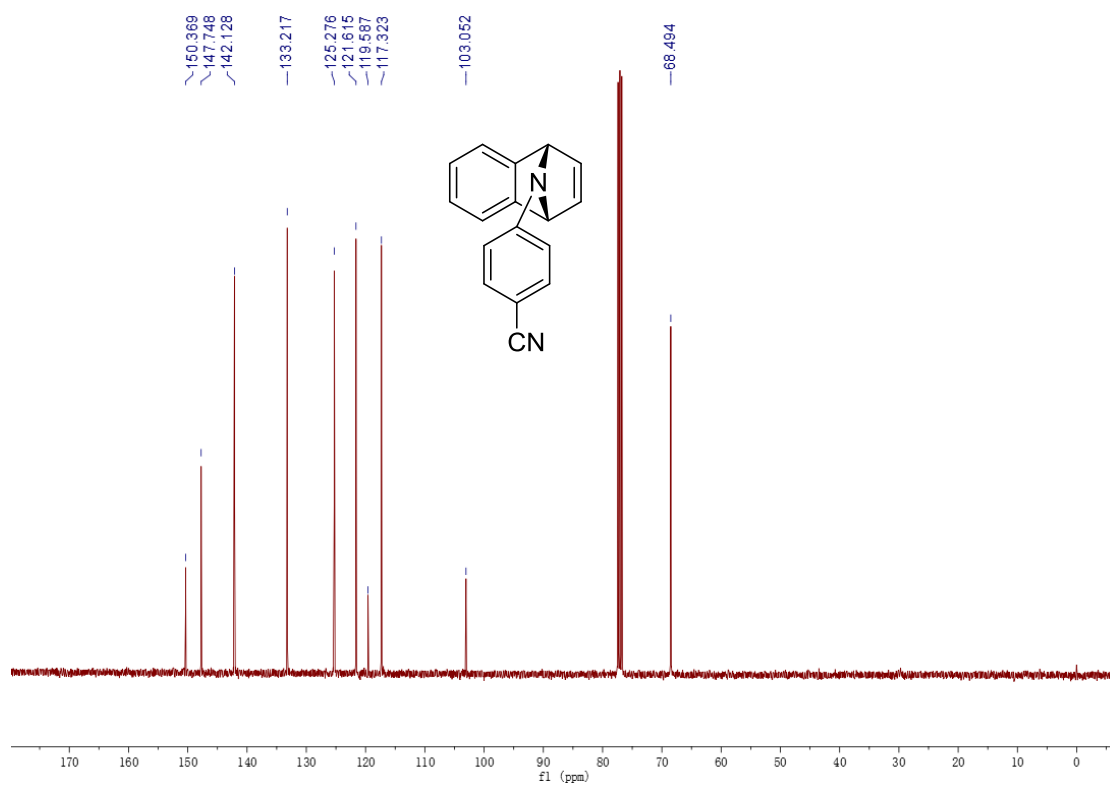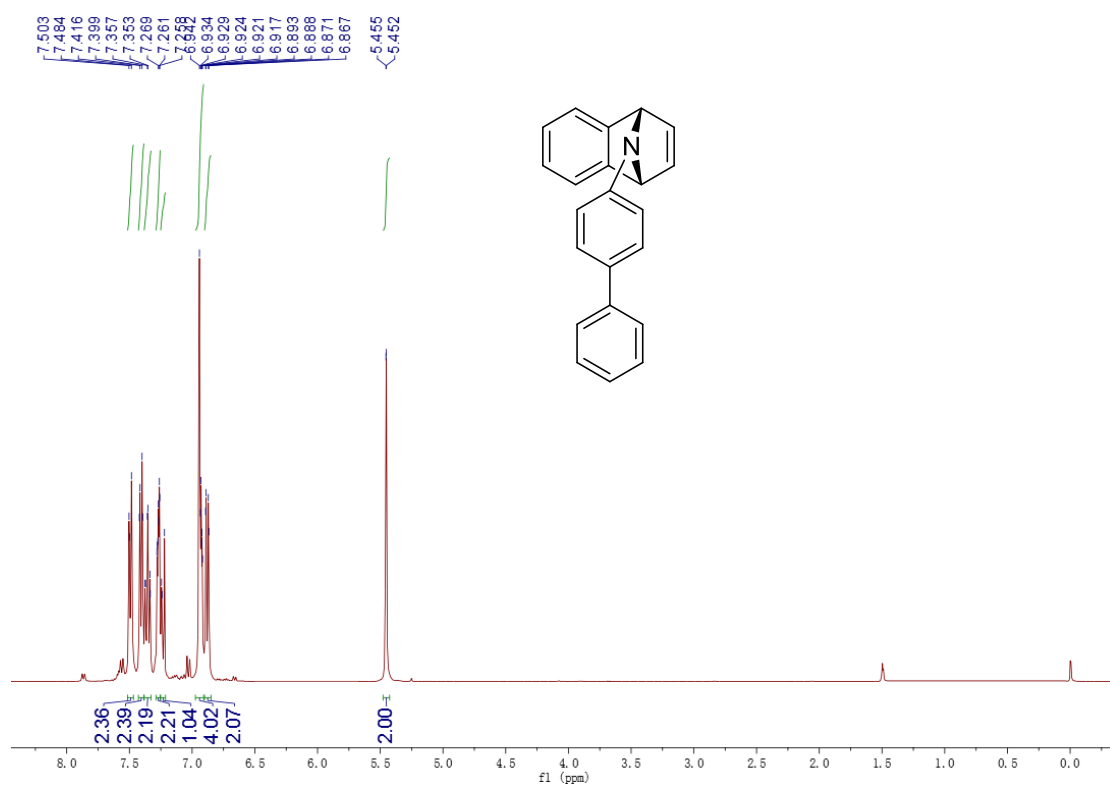

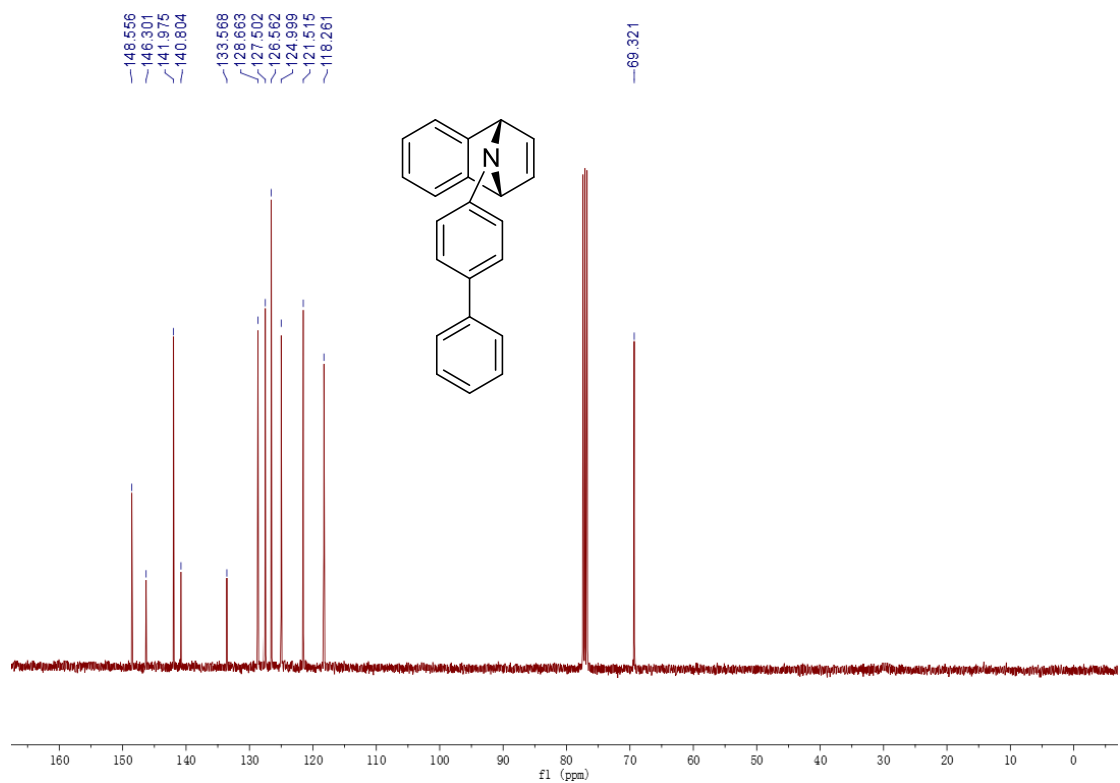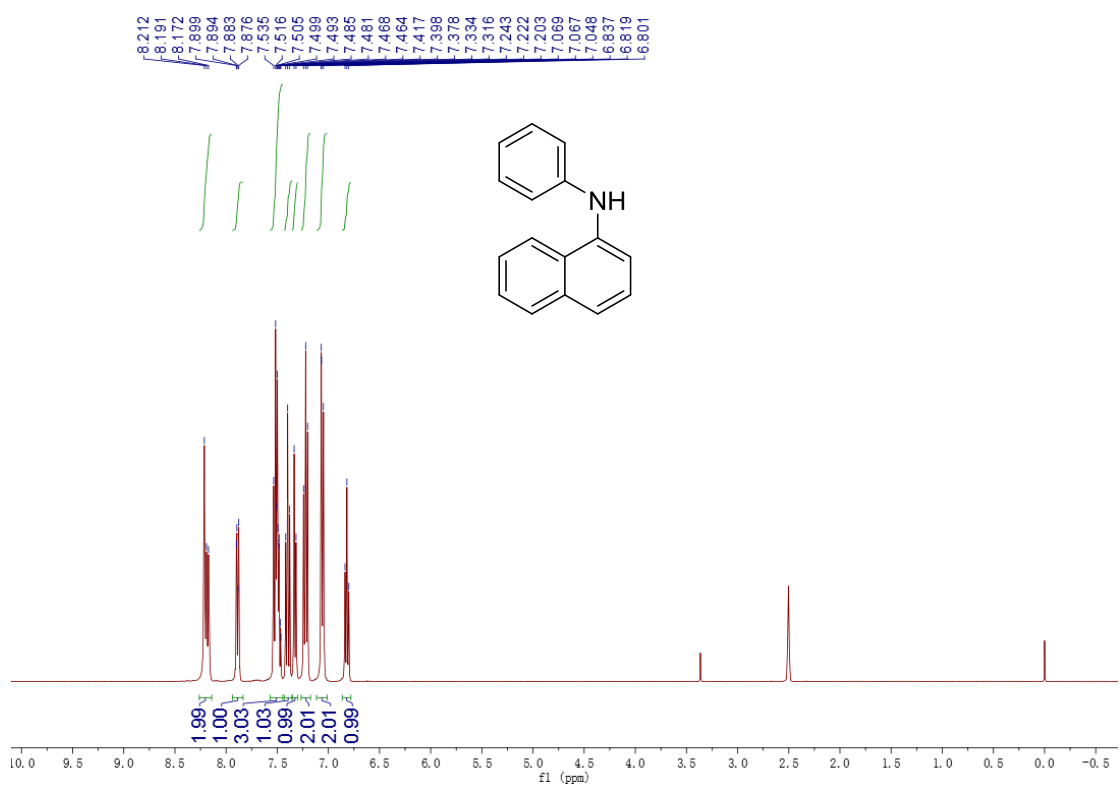

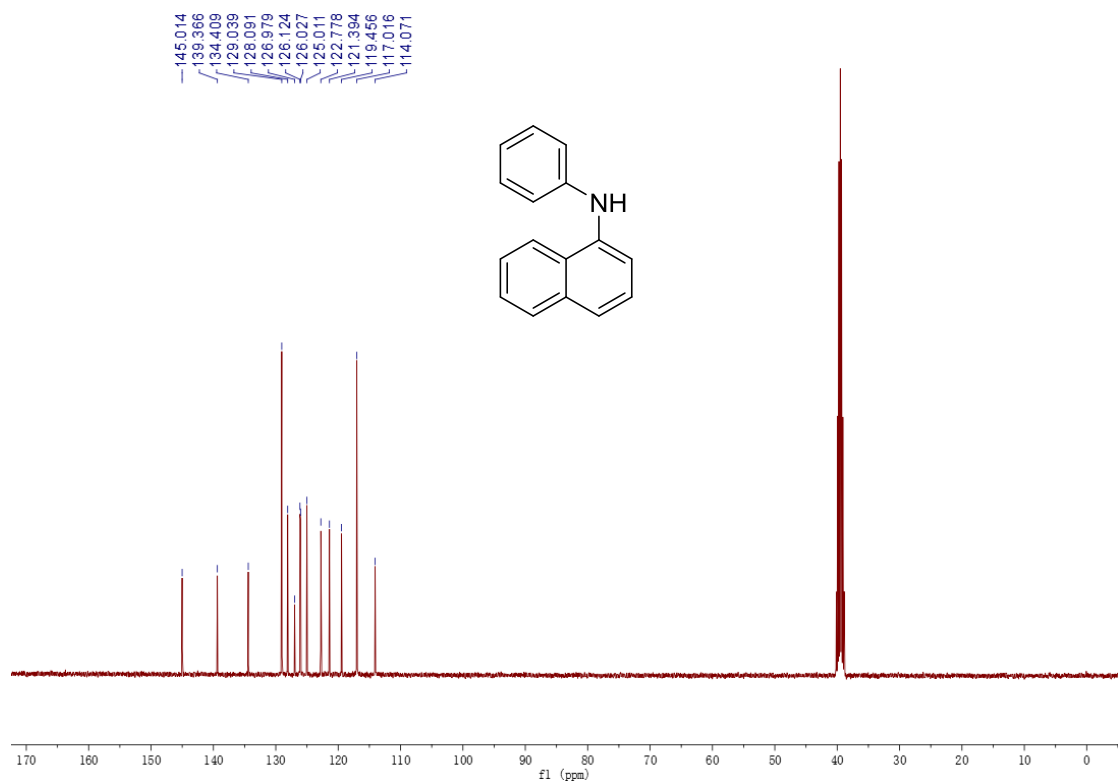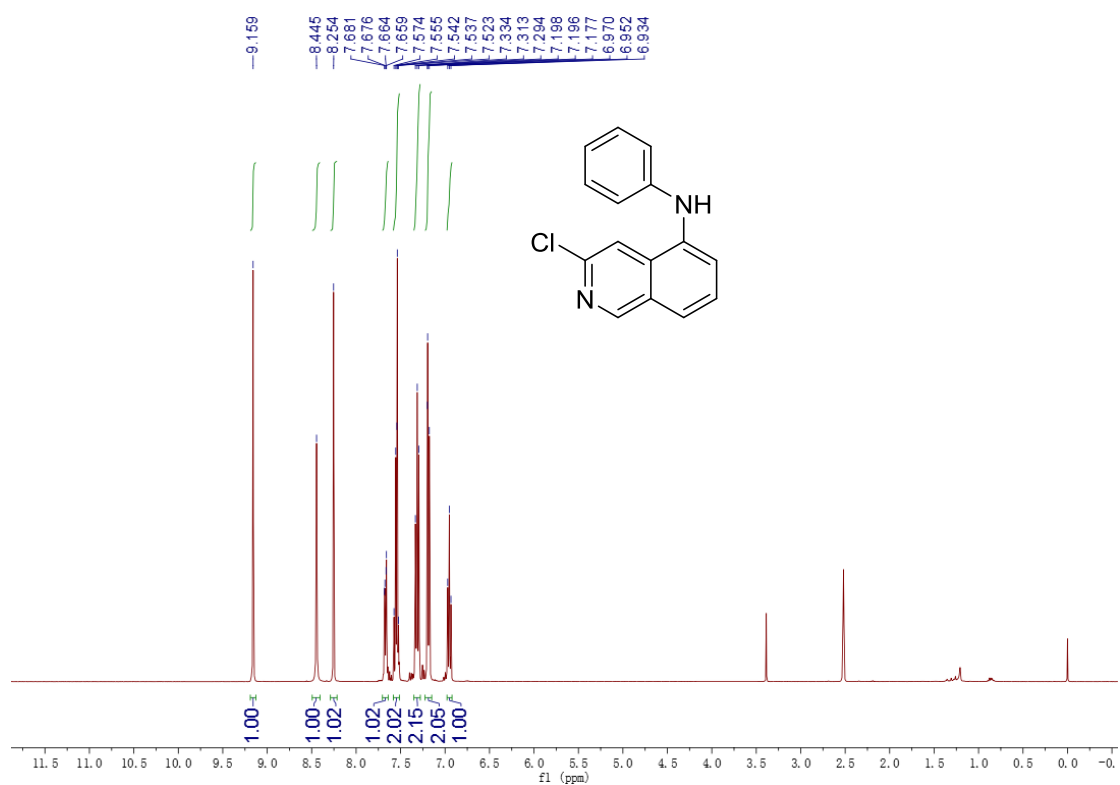

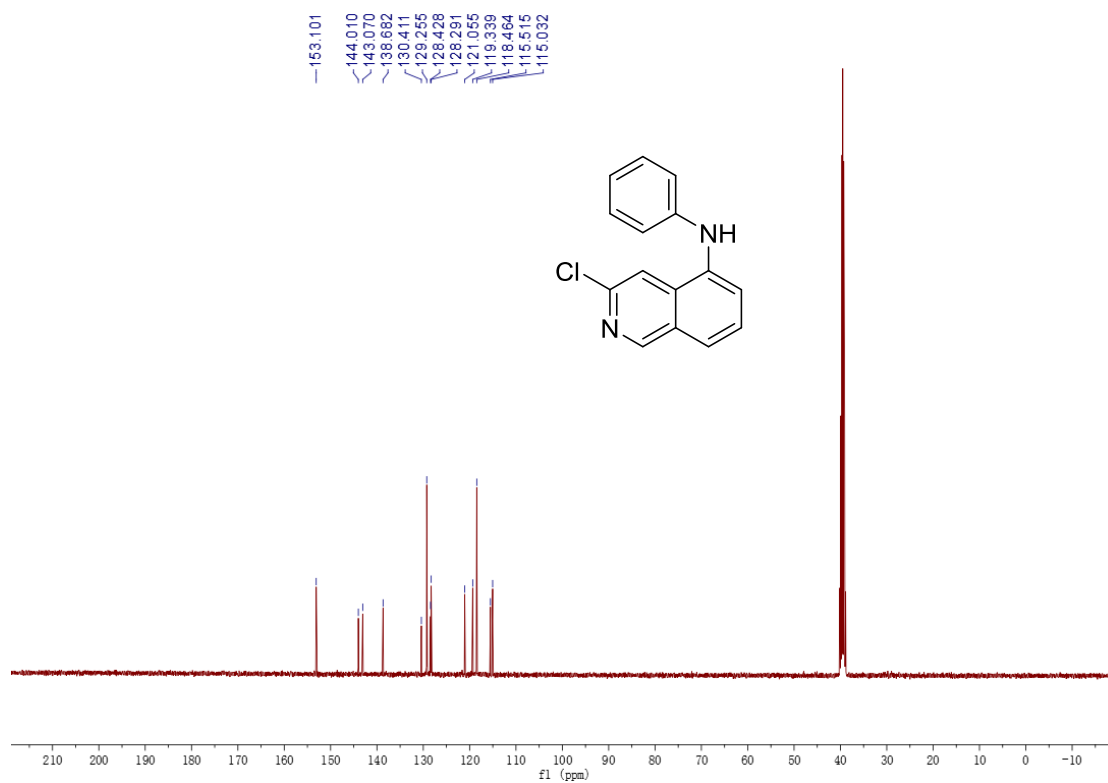

A:  $^1\text{H}$  NMR spectrum of the product recorded at 400 MHz in  $\text{DMSO}-d_6$  at 298K; B:  $^1\text{H}$  NMR spectrum of the product recorded at 400 MHz in  $\text{DMSO}-d_6$  (major) /  $\text{D}_2\text{O}$  (minor) at 298 K.

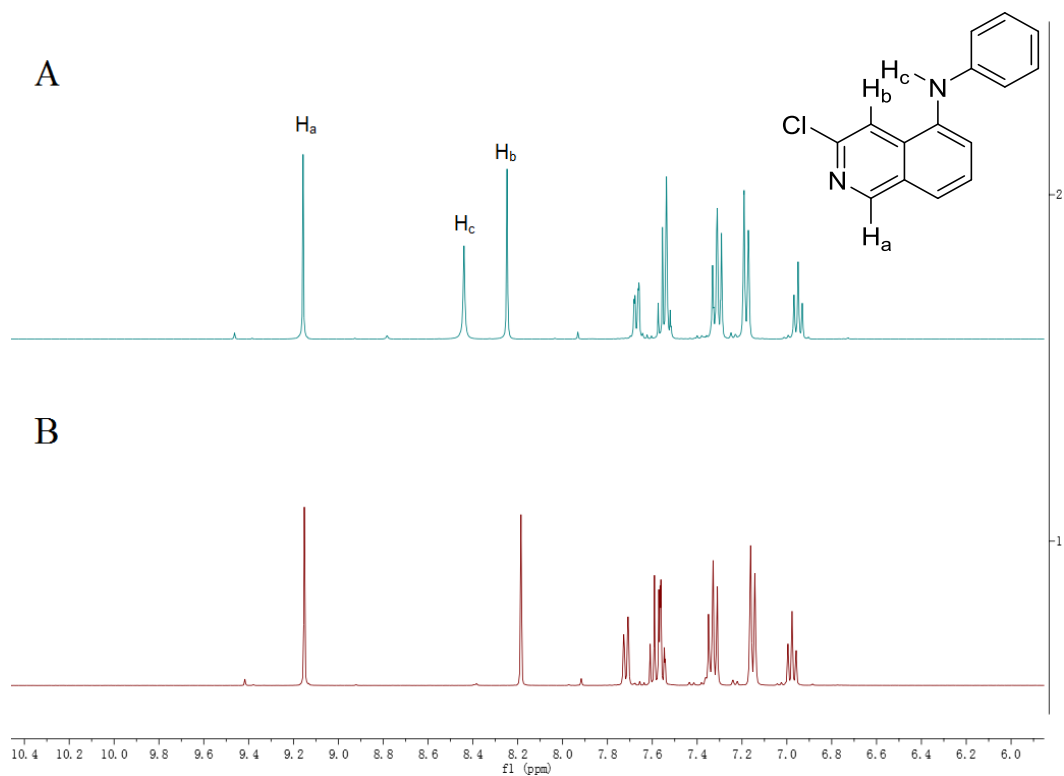

$^1\text{H}$ - $^1\text{H}$  NOSTY spectrum of the product recorded at 400 MHz in  $\text{DMSO-}d_6$  at 298 K

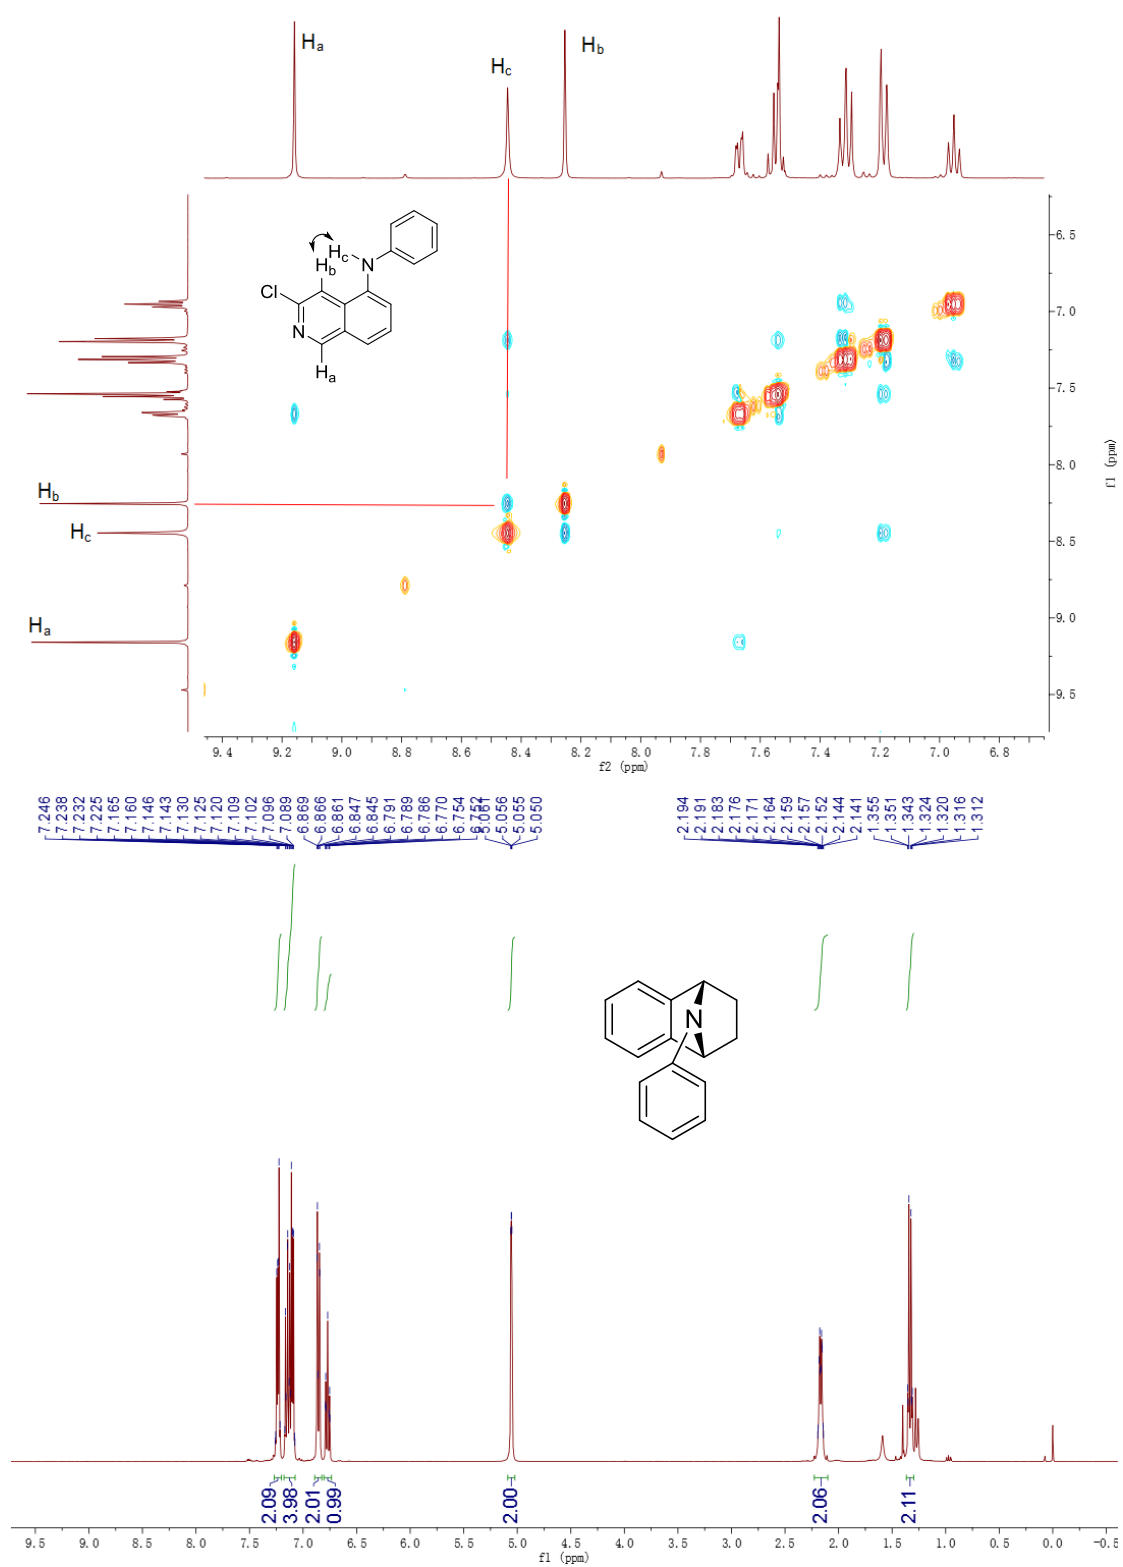

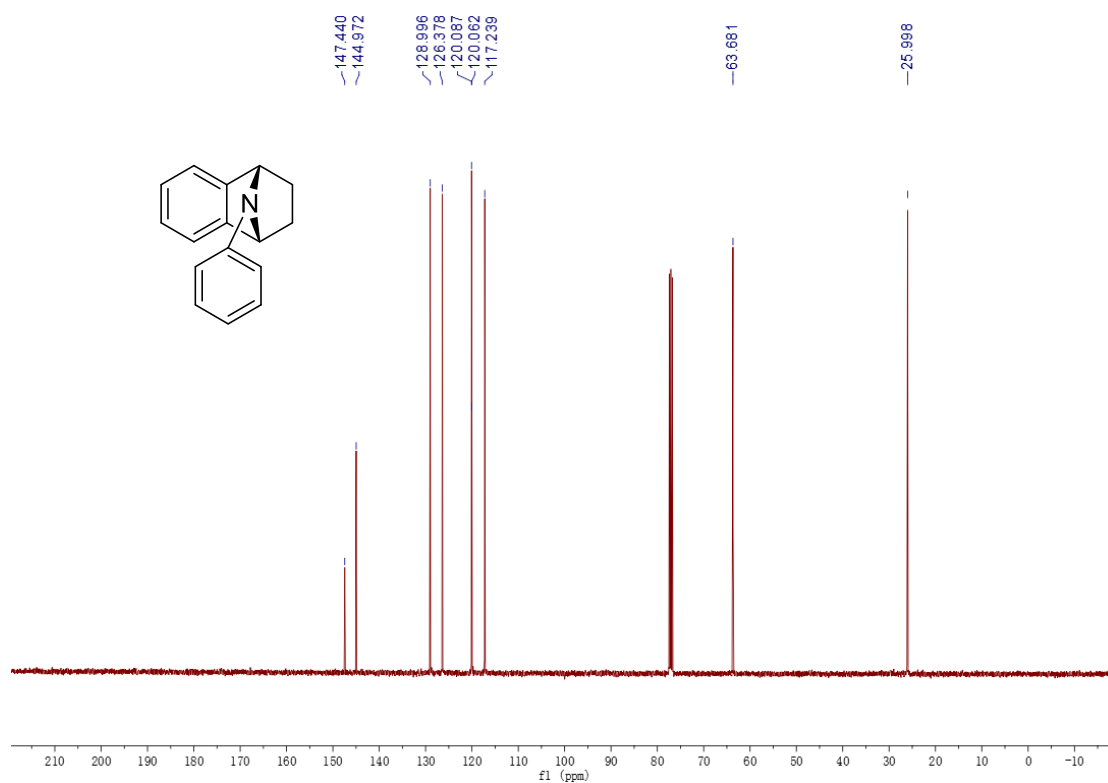

## Elemental Composition Report

Page 1

### Single Mass Analysis

Tolerance = 50.0 PPM / DBE: min = -1.5, max = 100.0

Element prediction: Off

Number of isotope peaks used for i-FIT = 3

Monoisotopic Mass, Even Electron Ions

16 formula(e) evaluated with 1 results within limits (up to 1 best isotopic matches for each mass)

Elements Used:

C: 0-44 H: 0-57 N: 0-3

LM-WANG

ECUST institute of Fine Chem

WL-CHG-110 36 (1.183) Cm (36)

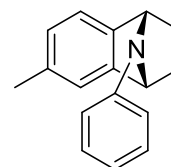

23-Jun-2017  
20:56:22  
1: TOF MS ES+  
1.74e+003

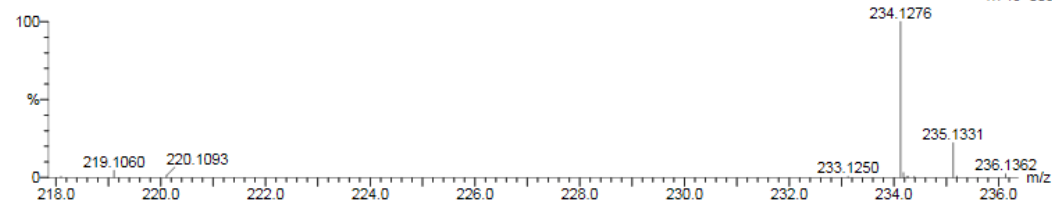

Minimum:

Maximum: 30.0 50.0 -1.5 100.0

| Mass     | Calc. Mass | mDa  | PPM  | DBE  | i-FIT | i-FIT (Norm) | Formula   |
|----------|------------|------|------|------|-------|--------------|-----------|
| 234.1276 | 234.1283   | -0.7 | -3.0 | 10.5 | 35.5  | 0.0          | C17 H16 N |

## Elemental Composition Report

Page 1

### Single Mass Analysis

Tolerance = 50.0 PPM / DBE: min = -1.5, max = 100.0

Element prediction: Off

Number of isotope peaks used for i-FIT = 3

Monoisotopic Mass, Even Electron Ions

1 formula(e) evaluated with 1 results within limits (up to 1 best isotopic matches for each mass)

Elements Used:

C: 0-20 H: 0-22 N: 0-1

LM-WANG

ECUST institute of Fine Chem

28-Jun-2017

22:04:29

1: TOF MS ES+

7.26e+003

WL-CHG-118 66 (0.905) Cm (65:67)

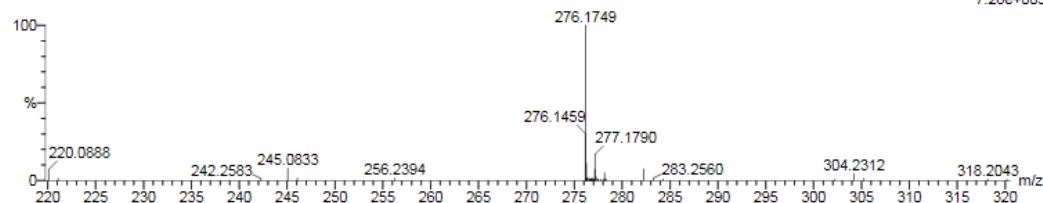

Minimum: -1.5  
Maximum: 100.0

| Mass     | Calc. Mass | mDa  | PPM  | DBE  | i-FIT | i-FIT (Norm) | Formula   |
|----------|------------|------|------|------|-------|--------------|-----------|
| 276.1749 | 276.1752   | -0.3 | -1.1 | 10.5 | 241.6 | 0.0          | C20 H22 N |

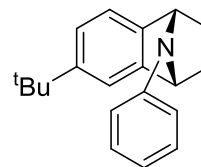

## Elemental Composition Report

Page 1

### Single Mass Analysis

Tolerance = 50.0 PPM / DBE: min = -1.5, max = 100.0

Element prediction: Off

Number of isotope peaks used for i-FIT = 3

Monoisotopic Mass, Even Electron Ions

2 formula(e) evaluated with 1 results within limits (up to 1 best isotopic matches for each mass)

Elements Used:

C: 0-16 H: 0-13 N: 0-1 F: 0-1

LM-WANG

ECUST institute of Fine Chem

30-Jun-2017

12:21:47

1: TOF MS ES+

6.83e+003

WL-CHG-113 12 (0.248) Cm (10:12)

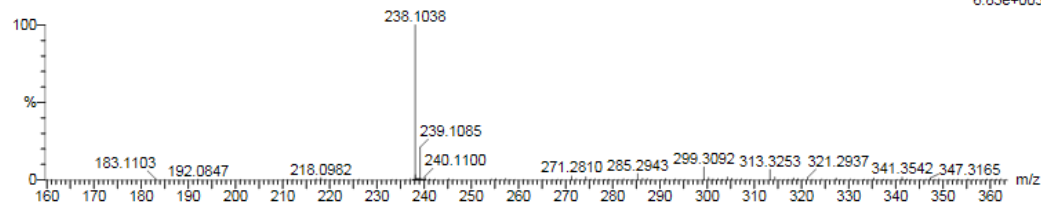

Minimum: -1.5  
Maximum: 100.0

| Mass     | Calc. Mass | mDa | PPM | DBE  | i-FIT | i-FIT (Norm) | Formula     |
|----------|------------|-----|-----|------|-------|--------------|-------------|
| 238.1038 | 238.1032   | 0.6 | 2.5 | 10.5 | 213.1 | 0.0          | C16 H13 N F |

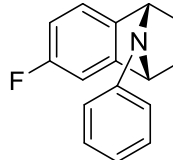

## Elemental Composition Report

Page 1

### Single Mass Analysis

Tolerance = 50.0 PPM / DBE: min = -1.5, max = 100.0

Element prediction: Off

Number of isotope peaks used for i-FIT = 3

Monoisotopic Mass, Even Electron Ions

7 formula(e) evaluated with 1 results within limits (up to 1 best isotopic matches for each mass)

Elements Used:

C: 0-16 H: 0-100 N: 0-1 Cl: 0-1

LM-WANG

ECUST institute of Fine Chem

WL-CHG-112 44 (0.629) Cm (43:45)

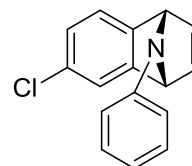

02-Jul-2017

13:51:29

1: TOF MS ES+  
3.55e+003

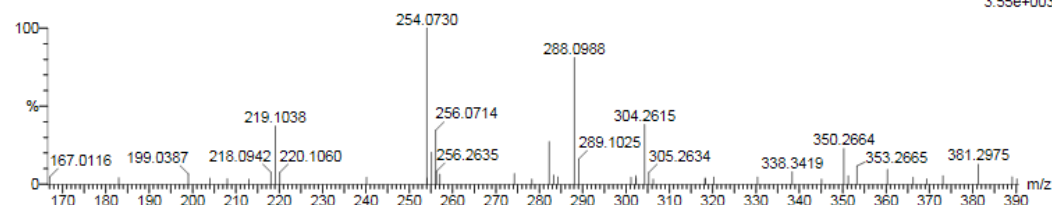

Minimum:  
Maximum:

30.0 50.0 -1.5  
100.0

| Mass     | Calc. Mass | mDa  | PPM  | DBE  | i-FIT | i-FIT (Norm) | Formula      |
|----------|------------|------|------|------|-------|--------------|--------------|
| 254.0730 | 254.0737   | -0.7 | -2.8 | 10.5 | 28.3  | 0.0          | C16 H13 N Cl |

## Elemental Composition Report

Page 1

### Single Mass Analysis

Tolerance = 50.0 PPM / DBE: min = -1.5, max = 100.0

Element prediction: Off

Number of isotope peaks used for i-FIT = 3

Monoisotopic Mass, Even Electron Ions

7 formula(e) evaluated with 1 results within limits (up to 1 best isotopic matches for each mass)

Elements Used:

C: 0-16 H: 0-57 N: 0-1 Br: 0-1

LM-WANG

ECUST institute of Fine Chem

WL-CHG-111 60 (1.920) Cm (59:60)

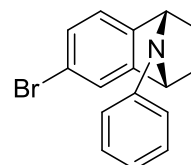

23-Jun-2017

20:59:51

1: TOF MS ES+  
2.09e+003

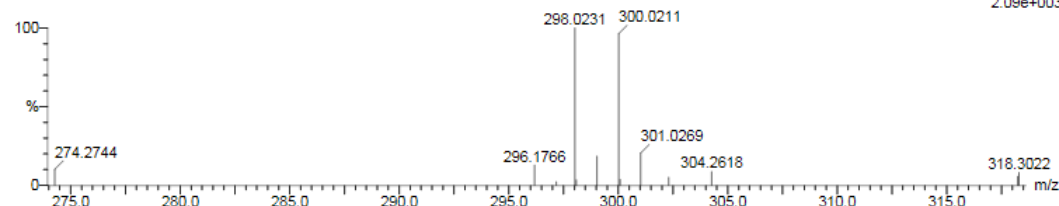

Minimum:  
Maximum:

30.0 50.0 -1.5  
100.0

| Mass     | Calc. Mass | mDa | PPM | DBE  | i-FIT | i-FIT (Norm) | Formula      |
|----------|------------|-----|-----|------|-------|--------------|--------------|
| 298.0231 | 298.0231   | 0.0 | 0.0 | 10.5 | 24.1  | 0.0          | C16 H13 N Br |



## Elemental Composition Report

Page 1

### Single Mass Analysis

Tolerance = 50.0 PPM / DBE: min = -1.5, max = 100.0

Element prediction: Off

Number of isotope peaks used for i-FIT = 3

Monoisotopic Mass, Even Electron Ions

6 formula(e) evaluated with 1 results within limits (up to 1 best isotopic matches for each mass)

Elements Used:

C: 0-17 H: 0-100 N: 0-2

LM-WANG

ECUST institute of Fine Chem

02-Jul-2017

14:01:35

1: TOF MS ES+

1.40e+003

WL-CHG-114 15 (0.280) Cm (15:16)

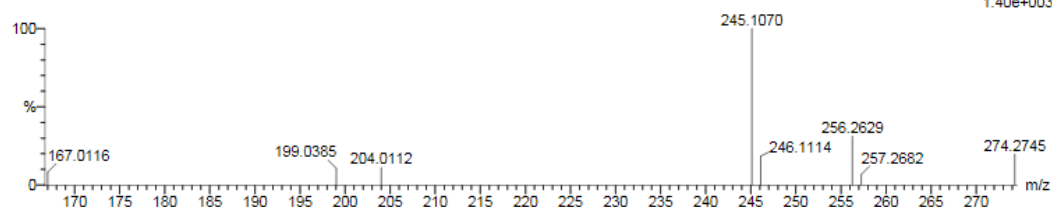

Minimum: 30.0 50.0 -1.5  
Maximum: 30.0 50.0 100.0

| Mass     | Calc. Mass | mDa  | PPM  | DBE  | i-FIT | i-FIT (Norm) | Formula    |
|----------|------------|------|------|------|-------|--------------|------------|
| 245.1070 | 245.1079   | -0.9 | -3.7 | 12.5 | 17.8  | 0.0          | C17 H13 N2 |

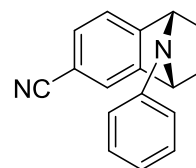

## Elemental Composition Report

Page 1

### Single Mass Analysis

Tolerance = 50.0 PPM / DBE: min = -1.5, max = 100.0

Element prediction: Off

Number of isotope peaks used for i-FIT = 3

Monoisotopic Mass, Even Electron Ions

13 formula(e) evaluated with 1 results within limits (up to 1 best isotopic matches for each mass)

Elements Used:

C: 0-16 H: 0-50 N: 0-2 O: 0-2

LM-WANG

ECUST institute of Fine Chem

27-Jun-2017

20:56:31

1: TOF MS ES-

6.22e+003

WL-CHG-115 11 (0.312) Cm (10:11)

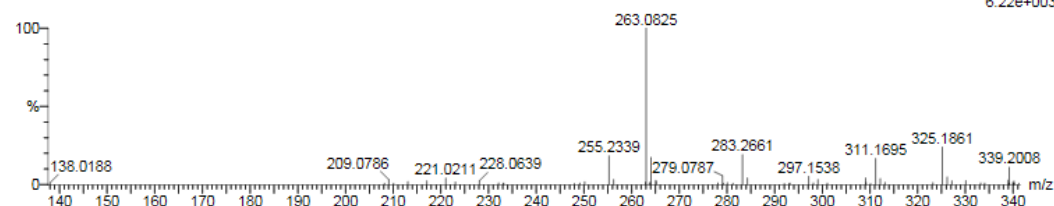

Minimum: 30.0 50.0 -1.5  
Maximum: 30.0 50.0 100.0

| Mass     | Calc. Mass | mDa | PPM | DBE  | i-FIT | i-FIT (Norm) | Formula       |
|----------|------------|-----|-----|------|-------|--------------|---------------|
| 263.0825 | 263.0821   | 0.4 | 1.5 | 12.5 | 32.7  | 0.0          | C16 H11 N2 O2 |

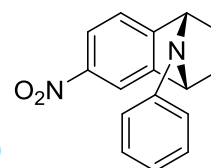

## Elemental Composition Report

Page 1

### Single Mass Analysis

Tolerance = 50.0 PPM / DBE: min = -1.5, max = 100.0

Element prediction: Off

Number of isotope peaks used for i-FIT = 3

Monoisotopic Mass, Even Electron Ions

11 formula(e) evaluated with 1 results within limits (up to 1 best isotopic matches for each mass)

Elements Used:

C: 0-17 H: 0-100 N: 0-1 F: 0-3

LM-WANG

ECUST institute of Fine Chem

02-Jul-2017

13:36:39

1: TOF MS ES+

1.08e+004

WL-CHG-117 29 (0.457) Cm (29:30)

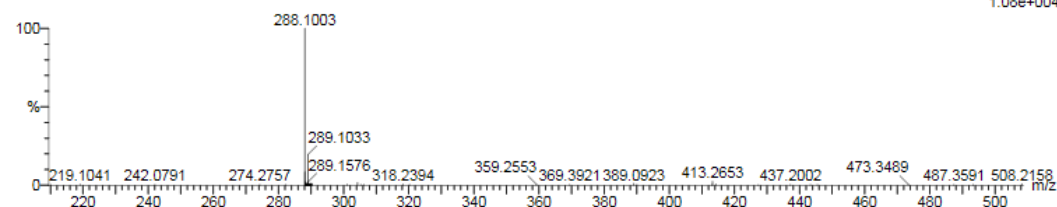

Minimum: -1.5  
Maximum: 100.0

| Mass     | Calc. Mass | mDa | PPM | DBE  | i-FIT | i-FIT (Norm) | Formula      |
|----------|------------|-----|-----|------|-------|--------------|--------------|
| 288.1003 | 288.1000   | 0.3 | 1.0 | 10.5 | 311.5 | 0.0          | C17 H13 N F3 |

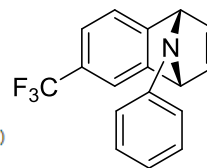

## Elemental Composition Report

Page 1

### Single Mass Analysis

Tolerance = 50.0 PPM / DBE: min = -1.5, max = 100.0

Element prediction: Off

Number of isotope peaks used for i-FIT = 3

Monoisotopic Mass, Even Electron Ions

20 formula(e) evaluated with 1 results within limits (up to 1 best isotopic matches for each mass)

Elements Used:

C: 0-17 H: 0-100 N: 0-1 O: 0-1 F: 0-3

LM-WANG

ECUST institute of Fine Chem

02-Jul-2017

13:46:59

1: TOF MS ES+

9.69e+002

WL-CHG-122 4 (0.149) Cm (2:4)

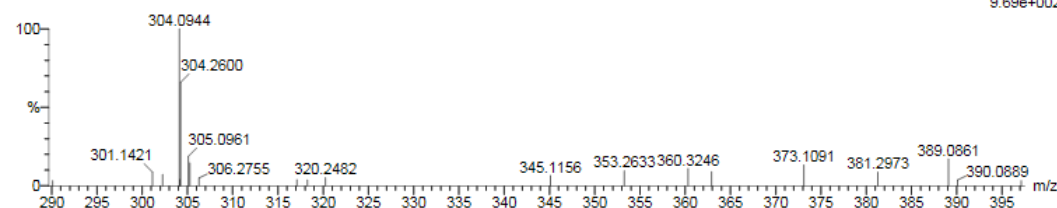

Minimum: -1.5  
Maximum: 100.0

| Mass     | Calc. Mass | mDa  | PPM  | DBE  | i-FIT | i-FIT (Norm) | Formula        |
|----------|------------|------|------|------|-------|--------------|----------------|
| 304.0944 | 304.0949   | -0.5 | -1.6 | 10.5 | 54.7  | 0.0          | C17 H13 N O F3 |

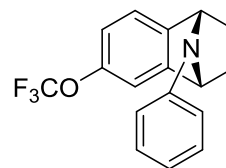

## Elemental Composition Report

Page 1

### Single Mass Analysis

Tolerance = 50.0 PPM / DBE: min = -1.5, max = 100.0

Element prediction: Off

Number of isotope peaks used for i-FIT = 3

Monoisotopic Mass, Even Electron Ions

5 formula(e) evaluated with 1 results within limits (up to 1 best isotopic matches for each mass)

Elements Used:

C: 0-22 H: 0-100 N: 0-1

LM-WANG

ECUST institute of Fine Chem

02-Jul-2017

14:05:47

1: TOF MS ES+  
8.42e+003

WL-CHG-121 34 (0.509) Cm (32:36)

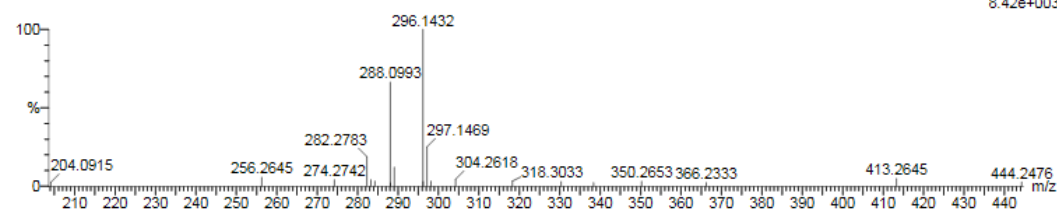

Minimum: -1.5  
Maximum: 100.0

| Mass     | Calc. Mass | mDa  | PPM  | DBE  | i-FIT | i-FIT (Norm) | Formula   |
|----------|------------|------|------|------|-------|--------------|-----------|
| 296.1432 | 296.1439   | -0.7 | -2.4 | 14.5 | 18.0  | 0.0          | C22 H18 N |

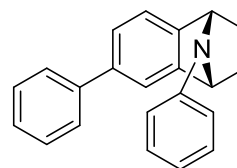

## Elemental Composition Report

Page 1

### Single Mass Analysis

Tolerance = 50.0 PPM / DBE: min = -1.5, max = 100.0

Element prediction: Off

Number of isotope peaks used for i-FIT = 3

Monoisotopic Mass, Even Electron Ions

5 formula(e) evaluated with 1 results within limits (up to 1 best isotopic matches for each mass)

Elements Used:

C: 0-22 H: 0-100 N: 0-1

LM-WANG

ECUST institute of Fine Chem

02-Jul-2017

13:57:32

1: TOF MS ES+  
8.05e+003

WL-CHG-120 28 (0.446) Cm (28:31)

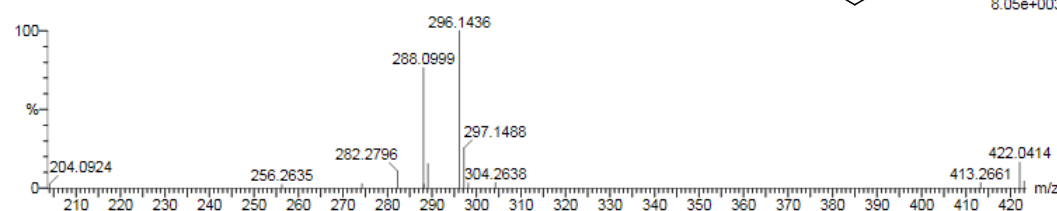

Minimum: -1.5  
Maximum: 100.0

| Mass     | Calc. Mass | mDa  | PPM  | DBE  | i-FIT | i-FIT (Norm) | Formula   |
|----------|------------|------|------|------|-------|--------------|-----------|
| 296.1436 | 296.1439   | -0.3 | -1.0 | 14.5 | 8.6   | 0.0          | C22 H18 N |

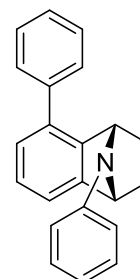

## Elemental Composition Report

Page 1

### Single Mass Analysis

Tolerance = 50.0 PPM / DBE: min = -1.5, max = 100.0

Element prediction: Off

Number of isotope peaks used for i-FIT = 3

Monoisotopic Mass, Even Electron Ions

4 formula(e) evaluated with 1 results within limits (up to 1 best isotopic matches for each mass)

Elements Used:

C: 0-15 H: 0-10 N: 0-2 Cl: 0-1

LM-WANG

ECUST institute of Fine Chem

WL-CHG-116 31 (0.752) Cm (31:32)

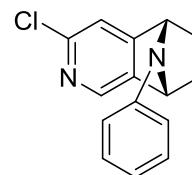

30-Jun-2017  
12:11:34  
1: TOF MS ES-  
9.17e+003

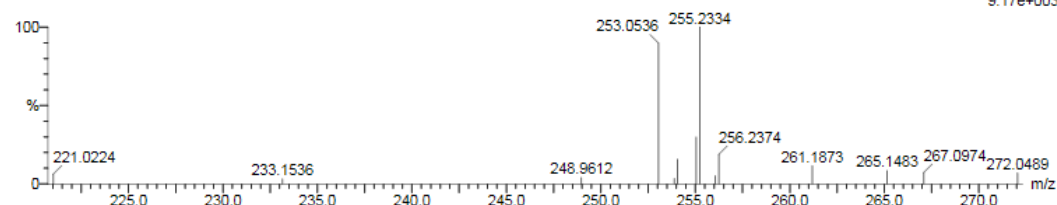

| Minimum: |            |      |     | -1.5  |       |              |         |           |
|----------|------------|------|-----|-------|-------|--------------|---------|-----------|
| Maximum: | 30.0       | 50.0 |     | 100.0 |       |              |         |           |
| Mass     | Calc. Mass | mDa  | PPM | DBE   | i-FIT | i-FIT (Norm) | Formula |           |
| 253.0536 | 253.0533   | 0.3  | 1.2 | 11.5  | 38.2  | 0.0          | C15     | H10 N2 Cl |

## Elemental Composition Report

Page 1

### Single Mass Analysis

Tolerance = 50.0 PPM / DBE: min = -1.5, max = 100.0

Element prediction: Off

Number of isotope peaks used for i-FIT = 3

Monoisotopic Mass, Even Electron Ions

1 formula(e) evaluated with 1 results within limits (up to 1 best isotopic matches for each mass)

Elements Used:

C: 0-17 H: 0-13 N: 0-2

LM-WANG

ECUST institute of Fine Chem

WL-CHG-119 31 (0.478) Cm (30:33)

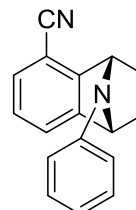

28-Jun-2017  
21:57:35  
1: TOF MS ES+  
1.52e+005

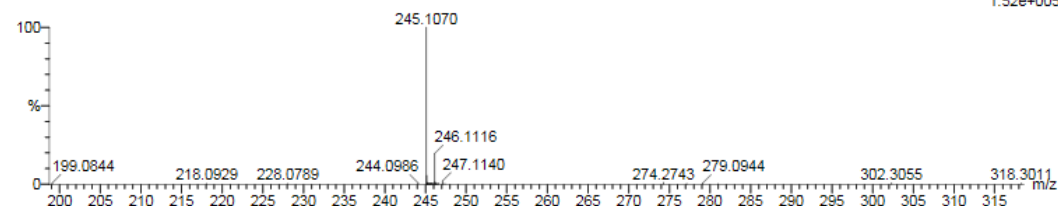

| Minimum: |            |      |      | -1.5  |       |              |         |        |
|----------|------------|------|------|-------|-------|--------------|---------|--------|
| Maximum: | 30.0       | 50.0 |      | 100.0 |       |              |         |        |
| Mass     | Calc. Mass | mDa  | PPM  | DBE   | i-FIT | i-FIT (Norm) | Formula |        |
| 245.1070 | 245.1079   | -0.9 | -3.7 | 12.5  | 373.6 | 0.0          | C17     | H13 N2 |

## Elemental Composition Report

Page 1

### Single Mass Analysis

Tolerance = 50.0 PPM / DBE: min = -1.5, max = 100.0

Element prediction: Off

Number of isotope peaks used for i-FIT = 3

Monoisotopic Mass, Even Electron Ions

13 formula(e) evaluated with 1 results within limits (up to 1 best isotopic matches for each mass)

Elements Used:

C: 0-16 H: 0-50 N: 0-1 F: 0-2

LM-WANG

ECUST institute of Fine Chem

WL-CHG-124 7 (0.299) Cm (6:8)

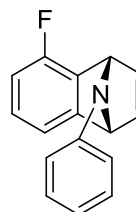

09-Jul-2017  
13:29:46  
1: TOF MS ES+  
1.31e+003

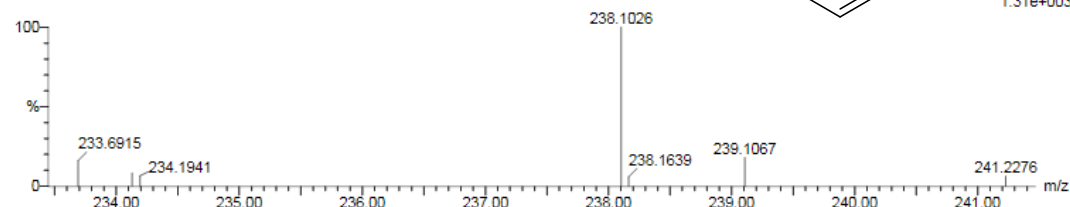

| Minimum: |            |      |      | -1.5  |       |              |             |
|----------|------------|------|------|-------|-------|--------------|-------------|
| Maximum: | 30.0       | 50.0 |      | 100.0 |       |              |             |
| Mass     | Calc. Mass | mDa  | PPM  | DBE   | i-FIT | i-FIT (Norm) | Formula     |
| 238.1026 | 238.1032   | -0.6 | -2.5 | 10.5  | 25.1  | 0.0          | C16 H13 N F |

## Elemental Composition Report

Page 1

### Single Mass Analysis

Tolerance = 50.0 PPM / DBE: min = -1.5, max = 100.0

Element prediction: Off

Number of isotope peaks used for i-FIT = 3

Monoisotopic Mass, Even Electron Ions

5 formula(e) evaluated with 1 results within limits (up to 1 best isotopic matches for each mass)

Elements Used:

C: 0-17 H: 0-50 N: 0-1

LM-WANG

ECUST institute of Fine Chem

WL-CHG-125 12 (0.446) Cm (11:12)

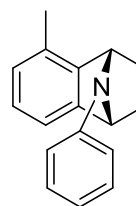

09-Jul-2017  
13:39:43  
1: TOF MS ES+  
3.24e+003

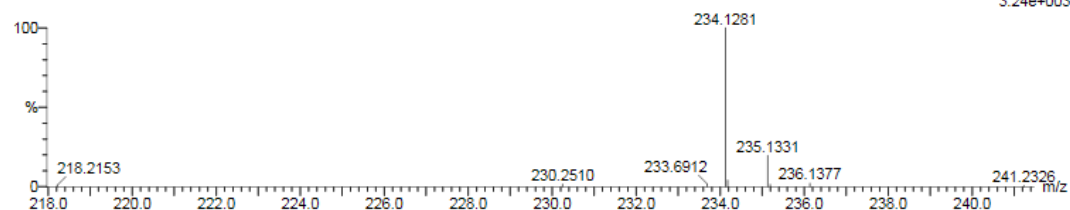

| Minimum: |            |      |      | -1.5  |       |              |           |
|----------|------------|------|------|-------|-------|--------------|-----------|
| Maximum: | 30.0       | 50.0 |      | 100.0 |       |              |           |
| Mass     | Calc. Mass | mDa  | PPM  | DBE   | i-FIT | i-FIT (Norm) | Formula   |
| 234.1281 | 234.1283   | -0.2 | -0.9 | 10.5  | 24.3  | 0.0          | C17 H16 N |

## Elemental Composition Report

Page 1

### Single Mass Analysis

Tolerance = 50.0 PPM / DBE: min = -1.5, max = 100.0

Element prediction: Off

Number of isotope peaks used for i-FIT = 3

Monoisotopic Mass, Even Electron Ions

25 formula(e) evaluated with 1 results within limits (up to 1 best isotopic matches for each mass)

Elements Used:

C: 0-16 H: 0-50 N: 0-3 F: 0-2

LM-WANG

ECUST institute of Fine Chem

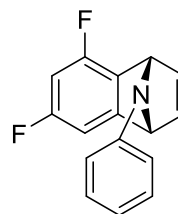

09-Jul-2017

13:09:32

1: TOF MS ES+

1.48e+003

WL-CHG-123 47 (1.529) Cm (47:48)

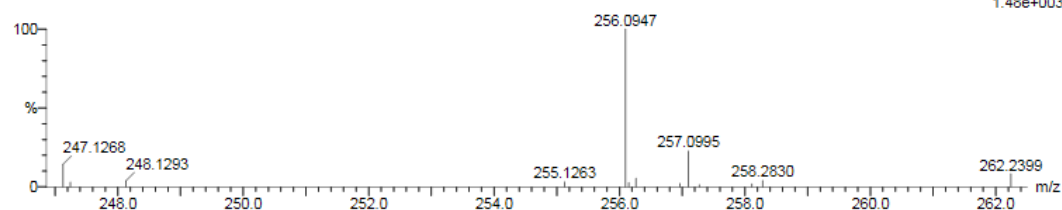

Minimum:

Maximum:

30.0

50.0

-1.5

100.0

| Mass     | Calc. Mass | mDa | PPM | DBE  | i-FIT | i-FIT (Norm) | Formula      |
|----------|------------|-----|-----|------|-------|--------------|--------------|
| 256.0947 | 256.0938   | 0.9 | 3.5 | 10.5 | 46.6  | 0.0          | C16 H12 N F2 |

## Elemental Composition Report

Page 1

### Single Mass Analysis

Tolerance = 30.0 PPM / DBE: min = -1.5, max = 100.0

Element prediction: Off

Number of isotope peaks used for i-FIT = 3

Monoisotopic Mass, Even Electron Ions

1 formula(e) evaluated with 1 results within limits (up to 1 best isotopic matches for each mass)

Elements Used:

C: 0-18 H: 0-23 N: 0-1

LM-WANG

ECUST institute of Fine Chem

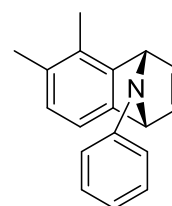

22-Jul-2017

12:56:26

1: TOF MS ES+

8.17e+003

WL-CHG-126 17 (0.620) Cm (17:18)

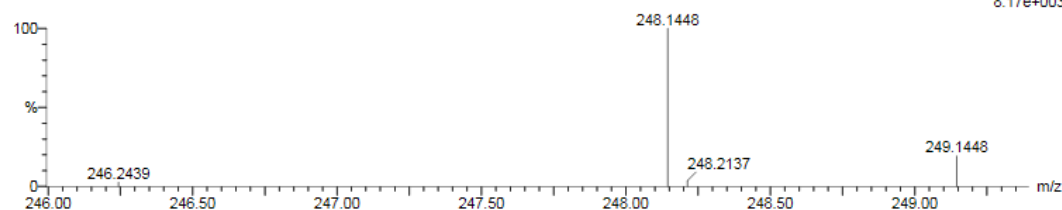

Minimum:

Maximum:

30.0

30.0

-1.5

100.0

| Mass     | Calc. Mass | mDa | PPM | DBE  | i-FIT | i-FIT (Norm) | Formula   |
|----------|------------|-----|-----|------|-------|--------------|-----------|
| 248.1448 | 248.1439   | 0.9 | 3.6 | 10.5 | 39.7  | 0.0          | C18 H18 N |

## Elemental Composition Report

Page 1

### Single Mass Analysis

Tolerance = 30.0 PPM / DBE: min = -1.5, max = 100.0

Element prediction: Off

Number of isotope peaks used for i-FIT = 3

Monoisotopic Mass, Even Electron Ions

1 formula(e) evaluated with 1 results within limits (up to 1 best isotopic matches for each mass)

Elements Used:

C: 0-18 H: 0-23 N: 0-1

LM-WANG

ECUST institute of Fine Chem

WL-CHG-127 5 (0.251) Cm (4:6)

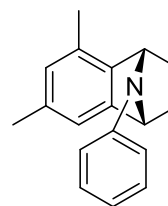

22-Jul-2017  
12:52:02  
1: TOF MS ES+  
1.20e+004

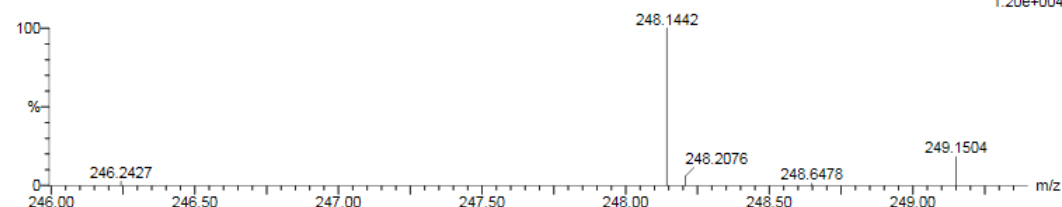

Minimum: -1.5  
Maximum: 30.0 30.0 100.0

| Mass     | Calc. Mass | mDa | PPM | DBE  | i-FIT | i-FIT (Norm) | Formula   |
|----------|------------|-----|-----|------|-------|--------------|-----------|
| 248.1442 | 248.1439   | 0.3 | 1.2 | 10.5 | 52.3  | 0.0          | C18 H18 N |

## Elemental Composition Report

Page 1

### Single Mass Analysis

Tolerance = 50.0 PPM / DBE: min = -1.5, max = 100.0

Element prediction: Off

Number of isotope peaks used for i-FIT = 3

Monoisotopic Mass, Even Electron Ions

5 formula(e) evaluated with 1 results within limits (up to 1 best isotopic matches for each mass)

Elements Used:

C: 0-17 H: 0-50 N: 0-1

LM-WANG

ECUST institute of Fine Chem

WL-CHG-160 27 (0.917) Cm (26:28)

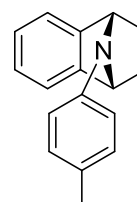

09-Jul-2017  
13:35:03  
1: TOF MS ES+  
4.05e+003

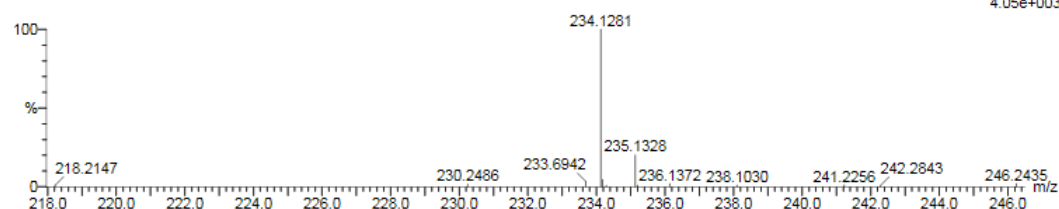

Minimum: -1.5  
Maximum: 30.0 50.0 100.0

| Mass     | Calc. Mass | mDa  | PPM  | DBE  | i-FIT | i-FIT (Norm) | Formula   |
|----------|------------|------|------|------|-------|--------------|-----------|
| 234.1281 | 234.1283   | -0.2 | -0.9 | 10.5 | 30.9  | 0.0          | C17 H16 N |

## Elemental Composition Report

Page 1

### Single Mass Analysis

Tolerance = 50.0 PPM / DBE: min = -1.5, max = 100.0

Element prediction: Off

Number of isotope peaks used for i-FIT = 3

Monoisotopic Mass, Even Electron Ions

3 formula(e) evaluated with 1 results within limits (up to 1 best isotopic matches for each mass)

Elements Used:

C: 0-20 H: 0-25 N: 0-2

LM-WANG

ECUST institute of Fine Chem

WL-CHG-162 5 (0.251) Cm (5:6)

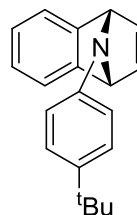

08-Jul-2017  
16:44:59  
1: TOF MS ES+  
9.81e+003

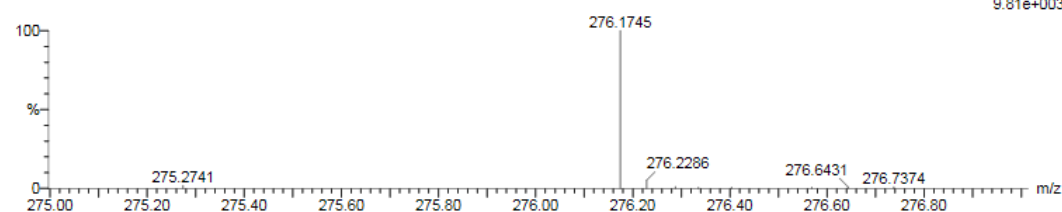

Minimum: -1.5  
Maximum: 100.0

| Mass     | Calc. Mass | mDa  | PPM  | DBE  | i-FIT | i-FIT (Norm) | Formula   |
|----------|------------|------|------|------|-------|--------------|-----------|
| 276.1745 | 276.1752   | -0.7 | -2.5 | 10.5 | 92.1  | 0.0          | C20 H22 N |

## Elemental Composition Report

Page 1

### Single Mass Analysis

Tolerance = 50.0 PPM / DBE: min = -1.5, max = 100.0

Element prediction: Off

Number of isotope peaks used for i-FIT = 3

Monoisotopic Mass, Even Electron Ions

1 formula(e) evaluated with 1 results within limits (up to 1 best isotopic matches for each mass)

Elements Used:

C: 0-17 H: 0-20 N: 0-1 O: 0-1

LM-WANG

ECUST institute of Fine Chem

WL-ZZA-161 20 (0.348) Cm (20:23)

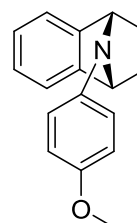

11-Jul-2017  
22:43:31  
1: TOF MS ES+  
4.73e+003

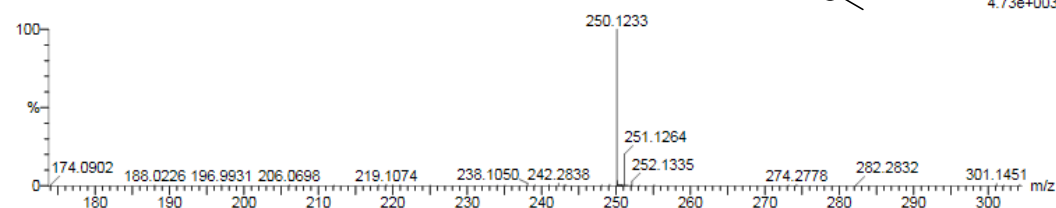

Minimum: -1.5  
Maximum: 100.0

| Mass     | Calc. Mass | mDa | PPM | DBE  | i-FIT | i-FIT (Norm) | Formula     |
|----------|------------|-----|-----|------|-------|--------------|-------------|
| 250.1233 | 250.1232   | 0.1 | 0.4 | 10.5 | 124.5 | 0.0          | C17 H16 N O |



## Elemental Composition Report

Page 1

## Single Mass Analysis

Tolerance = 50.0 PPM / DBE: min = -1.5, max = 100.0

Element prediction: Off

Number of isotope peaks used for i-FIT = 3

Monoisotopic Mass, Even Electron Ions

2 formula(e) evaluated with 1 results within limits (up to 1 best isotopic matches for each mass)

Elements Used:

C: 0-16 H: 0-20 N: 0-1 F: 0-1

LM-WANG

ECUST institute of Fine Chem

WL-ZZA-163 37 (0.560) Cm (37:39)

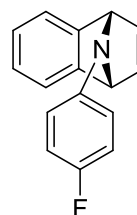11-Jul-2017  
22:33:32  
1: TOF MS ES+  
5.97e+003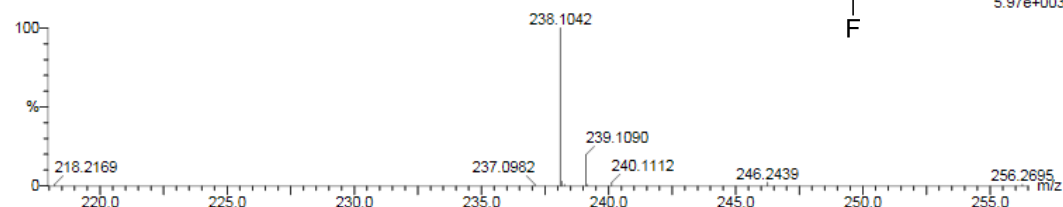

Minimum: -1.5  
Maximum: 30.0 50.0 100.0

| Mass     | Calc. Mass | mDa | PPM | DBE  | i-FIT | i-FIT (Norm) | Formula     |
|----------|------------|-----|-----|------|-------|--------------|-------------|
| 238.1042 | 238.1032   | 1.0 | 4.2 | 10.5 | 32.8  | 0.0          | C16 H13 N F |

## Elemental Composition Report

Page 1

## Single Mass Analysis

Tolerance = 50.0 PPM / DBE: min = -1.5, max = 100.0

Element prediction: Off

Number of isotope peaks used for i-FIT = 3

Monoisotopic Mass, Even Electron Ions

5 formula(e) evaluated with 1 results within limits (up to 1 best isotopic matches for each mass)

Elements Used:

C: 0-16 H: 0-35 N: 0-1 Cl: 0-1

LM-WANG

ECUST institute of Fine Chem

WL-CHG-164 19 (0.337) Cm (18:19)

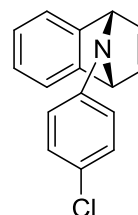11-Jul-2017  
23:11:21  
1: TOF MS ES+  
1.75e+003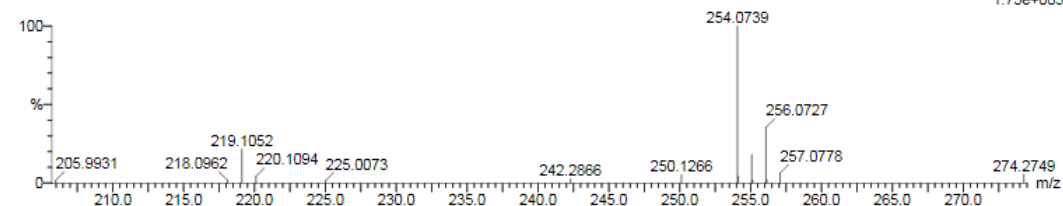

Minimum: -1.5  
Maximum: 30.0 50.0 100.0

| Mass     | Calc. Mass | mDa | PPM | DBE  | i-FIT | i-FIT (Norm) | Formula      |
|----------|------------|-----|-----|------|-------|--------------|--------------|
| 254.0739 | 254.0737   | 0.2 | 0.8 | 10.5 | 29.9  | 0.0          | C16 H13 N Cl |

## Elemental Composition Report

Page 1

### Single Mass Analysis

Tolerance = 50.0 PPM / DBE: min = -1.5, max = 100.0

Element prediction: Off

Number of isotope peaks used for i-FIT = 3

Monoisotopic Mass, Even Electron Ions

5 formula(e) evaluated with 1 results within limits (up to 1 best isotopic matches for each mass)

Elements Used:

C: 0-16 H: 0-35 N: 0-1 Br: 0-1

LM-WANG

ECUST institute of Fine Chem

WL-CHG-165 23 (0.378) Cm (23:25)

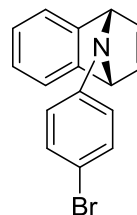

11-Jul-2017  
23:14:23  
1: TOF MS ES+  
3.91e+003

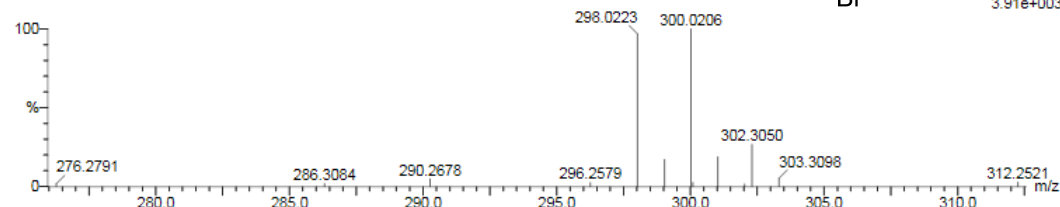

Minimum: -1.5  
Maximum: 30.0 50.0 100.0

| Mass     | Calc. Mass | mDa  | PPM  | DBE  | i-FIT | i-FIT (Norm) | Formula      |
|----------|------------|------|------|------|-------|--------------|--------------|
| 298.0223 | 298.0231   | -0.8 | -2.7 | 10.5 | 16.1  | 0.0          | C16 H13 N Br |

## Elemental Composition Report

Page 1

### Single Mass Analysis

Tolerance = 30.0 PPM / DBE: min = -1.5, max = 100.0

Element prediction: Off

Number of isotope peaks used for i-FIT = 3

Monoisotopic Mass, Even Electron Ions

6 formula(e) evaluated with 1 results within limits (up to 1 best isotopic matches for each mass)

Elements Used:

C: 0-17 H: 0-15 N: 0-1 F: 0-3

LM-WANG

ECUST institute of Fine Chem

WL-CHG-166 13 (0.496) Cm (13:15)

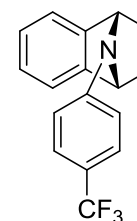

22-Jul-2017  
12:49:21  
1: TOF MS ES+  
5.30e+002

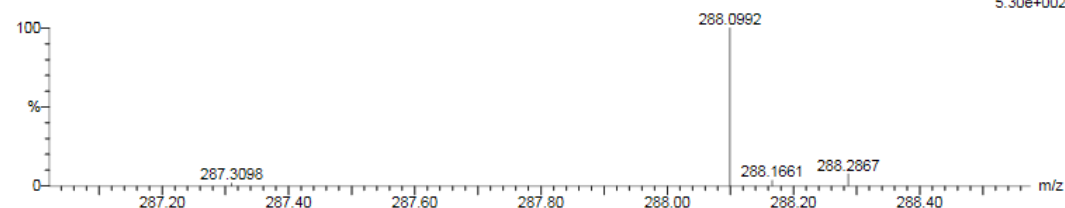

Minimum: -1.5  
Maximum: 30.0 30.0 100.0

| Mass     | Calc. Mass | mDa  | PPM  | DBE  | i-FIT | i-FIT (Norm) | Formula      |
|----------|------------|------|------|------|-------|--------------|--------------|
| 288.0992 | 288.1000   | -0.8 | -2.8 | 10.5 | 35.0  | 0.0          | C17 H13 N F3 |

## Elemental Composition Report

Page 1

## Single Mass Analysis

Tolerance = 30.0 PPM / DBE: min = -1.5, max = 100.0

Element prediction: Off

Number of isotope peaks used for i-FIT = 3

Monoisotopic Mass, Even Electron Ions

13 formula(e) evaluated with 1 results within limits (up to 1 best isotopic matches for each mass)

Elements Used:

C: 0-18 H: 0-23 N: 0-1 O: 0-1 F: 0-3

LM-WANG

ECUST institute of Fine Chem

WL-CHG-167 9 (0.374) Cm (9:10)

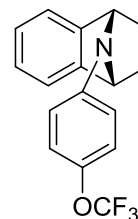22-Jul-2017  
12:54:20  
1: TOF MS ES+  
3.31e+003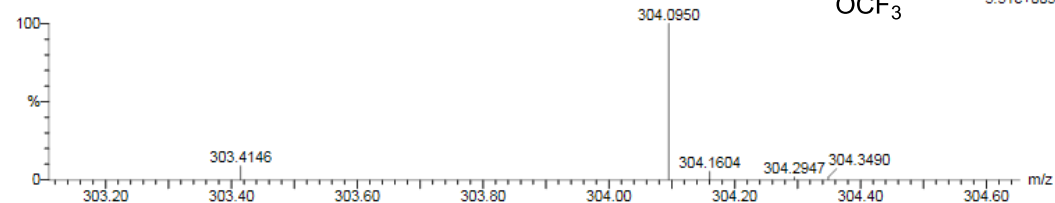

Minimum:

Maximum:

30.0

30.0

-1.5

100.0

| Mass     | Calc. Mass | mDa | PPM | DBE  | i-FIT | i-FIT (Norm) | Formula        |
|----------|------------|-----|-----|------|-------|--------------|----------------|
| 304.0950 | 304.0949   | 0.1 | 0.3 | 10.5 | 52.4  | 0.0          | C17 H13 N O F3 |

## Elemental Composition Report

Page 1

## Single Mass Analysis

Tolerance = 30.0 PPM / DBE: min = -1.5, max = 100.0

Element prediction: Off

Number of isotope peaks used for i-FIT = 3

Monoisotopic Mass, Even Electron Ions

1 formula(e) evaluated with 1 results within limits (up to 1 best isotopic matches for each mass)

Elements Used:

C: 0-17 H: 0-13 N: 0-2

LM-WANG

ECUST institute of Fine Chem

WL-CHG-1711 104 (1.366) Cm (102:107)

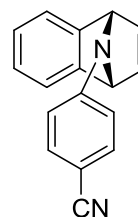13-Sep-2017  
23:08:32  
1: TOF MS ES+  
1.18e+004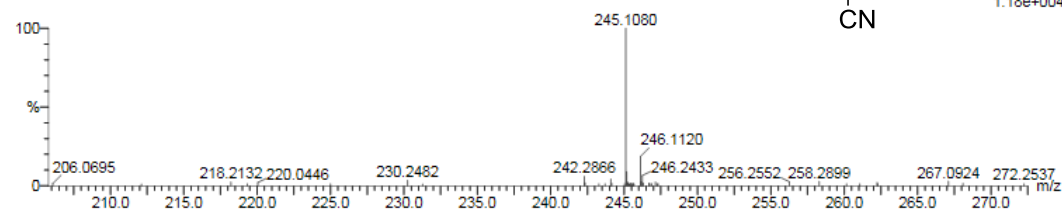

Minimum:

Maximum:

30.0

30.0

-1.5

100.0

| Mass     | Calc. Mass | mDa | PPM | DBE  | i-FIT | i-FIT (Norm) | Formula    |
|----------|------------|-----|-----|------|-------|--------------|------------|
| 245.1080 | 245.1079   | 0.1 | 0.4 | 12.5 | 197.9 | 0.0          | C17 H13 N2 |

## Elemental Composition Report

Page 1

### Single Mass Analysis

Tolerance = 30.0 PPM / DBE: min = -1.5, max = 100.0

Element prediction: Off

Number of isotope peaks used for i-FIT = 3

Monoisotopic Mass, Even Electron Ions

12 formula(e) evaluated with 1 results within limits (up to 1 best isotopic matches for each mass)

Elements Used:

C: 0-27 H: 0-81 N: 0-2

LM-WANG

ECUST institute of Fine Chem

WL-CHG-168 10 (0.227) Cm (10:12)

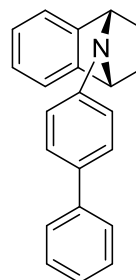

20-Jul-2017  
18:18:14  
1: TOF MS ES+  
5.14e+002

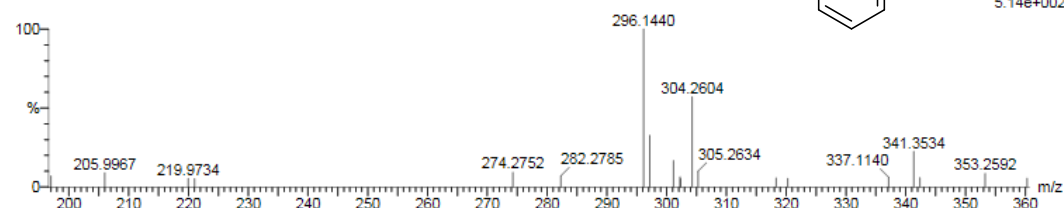

Minimum:  
Maximum:

|          |            |     |     |      |       |              |           |
|----------|------------|-----|-----|------|-------|--------------|-----------|
| Mass     | Calc. Mass | mDa | PPM | DBE  | i-FIT | i-FIT (Norm) | Formula   |
| 296.1440 | 296.1439   | 0.1 | 0.3 | 14.5 | 15.9  | 0.0          | C22 H18 N |

## Elemental Composition Report

Page 1

### Single Mass Analysis

Tolerance = 30.0 PPM / DBE: min = -1.5, max = 100.0

Element prediction: Off

Number of isotope peaks used for i-FIT = 3

Monoisotopic Mass, Even Electron Ions

73 formula(e) evaluated with 3 results within limits (up to 1 best isotopic matches for each mass)

Elements Used:

C: 0-38 H: 0-82 N: 0-4 Cl: 0-4

LM-WANG

ECUST institute of Fine Chem

WL-CHG-182 192 (2.440) Cm (188:194)

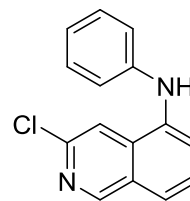

22-Sep-2017  
14:40:59  
1: TOF MS ES+  
1.88e+003

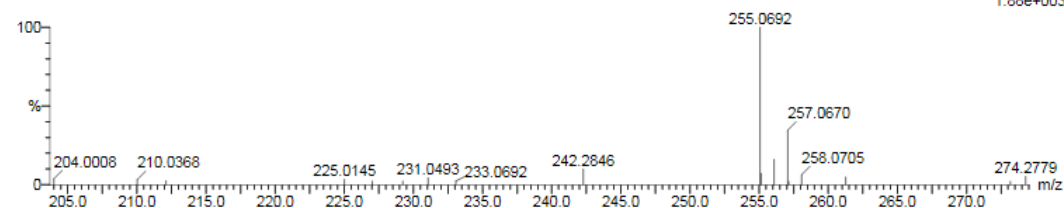

Minimum:  
Maximum:

|          |            |     |     |      |       |              |               |
|----------|------------|-----|-----|------|-------|--------------|---------------|
| Mass     | Calc. Mass | mDa | PPM | DBE  | i-FIT | i-FIT (Norm) | Formula       |
| 255.0692 | 255.0689   | 0.3 | 1.2 | 10.5 | 22.6  | 0.0          | C15 H12 N2 Cl |

# Elemental Composition Report

Page 1

## Single Mass Analysis

Tolerance = 30.0 PPM / DBE: min = -1.5, max = 100.0

Element prediction: Off

Number of isotope peaks used for i-FIT = 3

Monoisotopic Mass, Even Electron Ions

19 formula(e) evaluated with 1 results within limits (up to 1 best isotopic matches for each mass)

Elements Used:

C: 0-38 H: 0-82 N: 0-4

LM-WANG

ECUST institute of Fine Chem

WL-CHG-1861 48 (0.686) Cm (48:50)

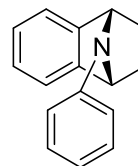

22-Sep-2017  
14:47:42  
1: TOF MS ES+  
9.67e+002

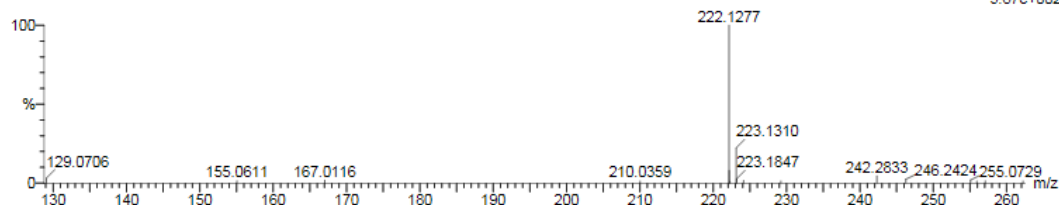

Minimum: -1.5  
Maximum: 30.0 30.0 100.0

| Mass     | Calc. Mass | mDa  | PPM  | DBE | i-FIT | i-FIT (Norm) | Formula   |
|----------|------------|------|------|-----|-------|--------------|-----------|
| 222.1277 | 222.1283   | -0.6 | -2.7 | 9.5 | 24.4  | 0.0          | C16 H16 N |
